# Supplementary material for: Sepsis-associated pathways segregate cancer groups
Source: Springer Nature journal article supplement (doi:10.1186/s12885-020-06774-9), 2020-04-15
Supplement: MOESM2 [file 17898360]

# Gene-level heatmap for 66 pathways

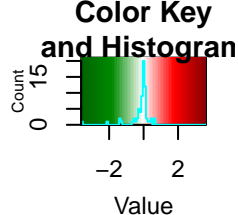

## Chemical carcinogenesis hsa05204

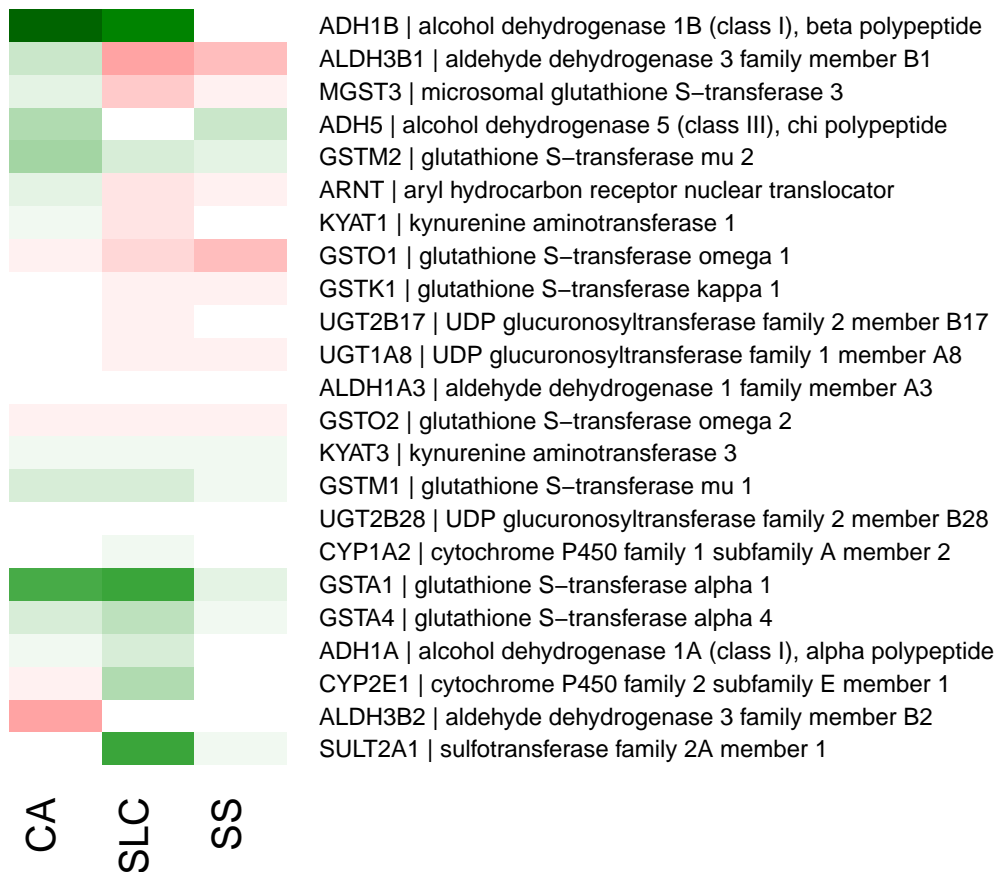

Cancer

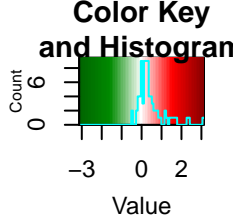

## Bladder cancer hsa05219

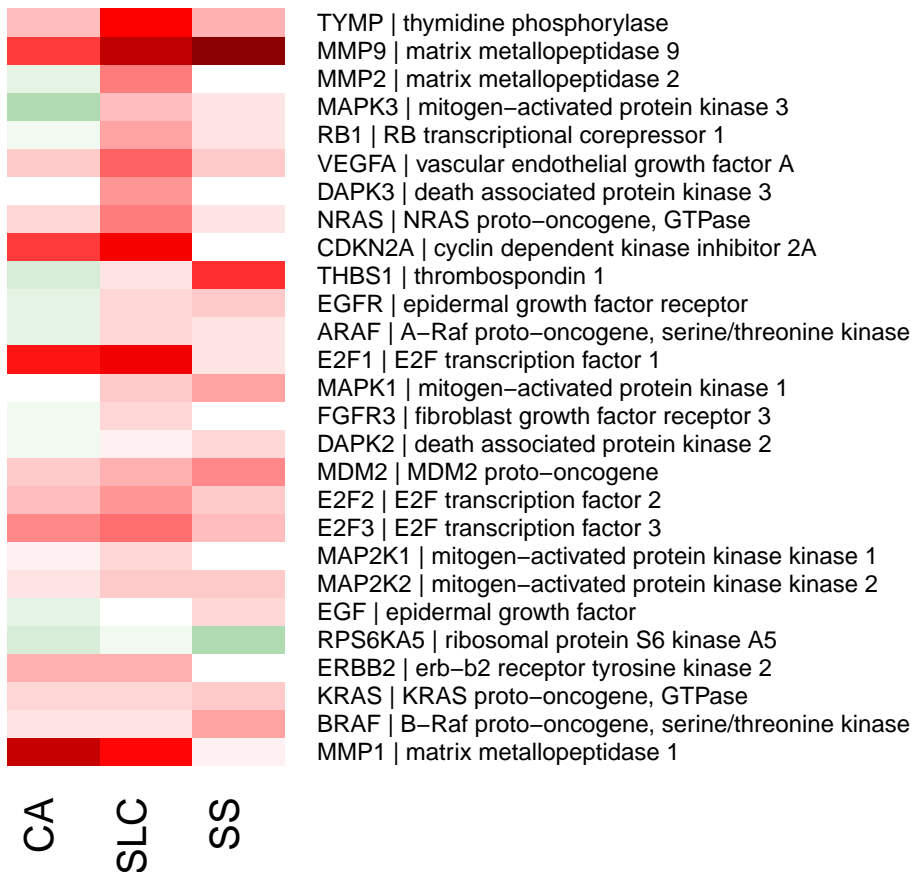

Cancer



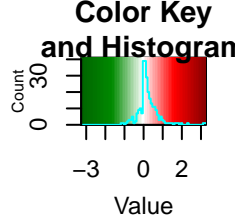

# Transcriptional misregulation in cancer

## hsa05202

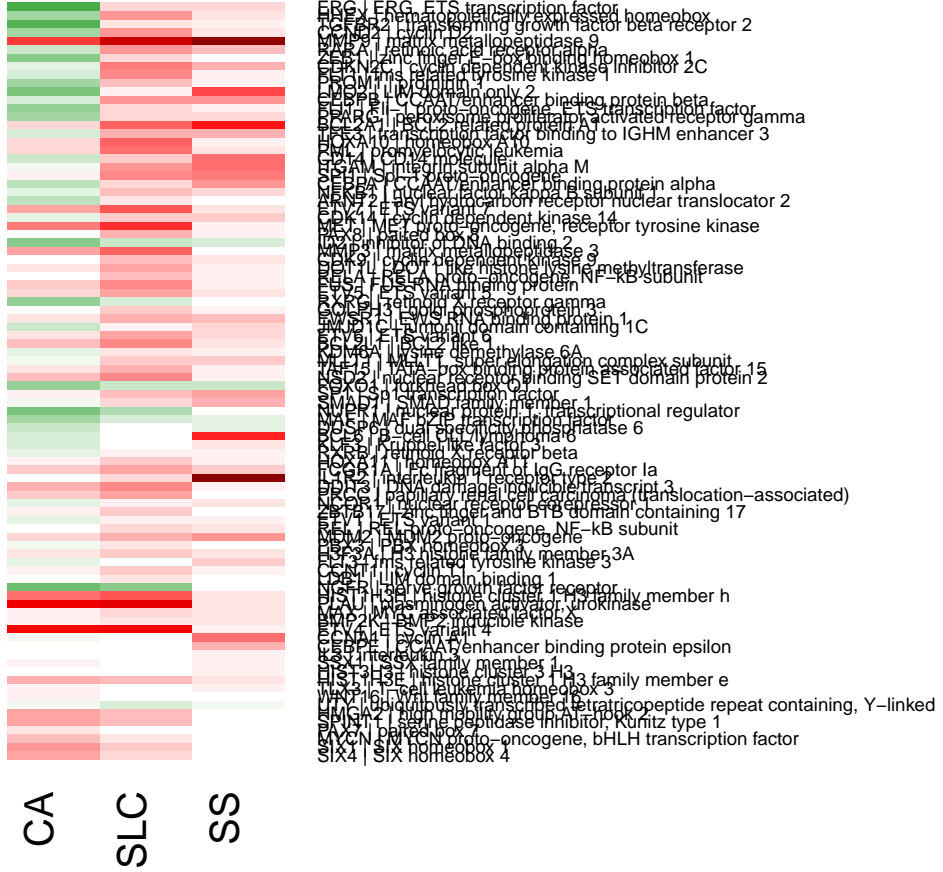

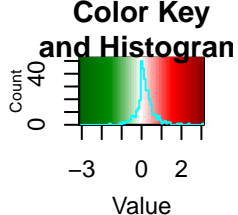

# Proteoglycans in cancer

## hsa05205

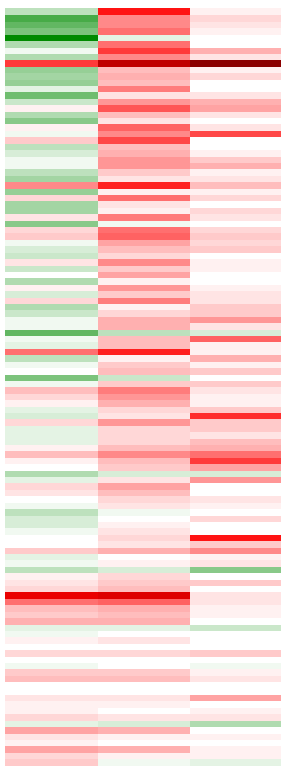

BTGA5 | integrin subunit alpha 5  
BTGA6 | integrin subunit alpha 6  
BTGA7 | integrin subunit alpha 7  
BTGA8 | transforming growth factor beta 1  
BTGA9 | mitogen-activated protein kinase 2  
BTGA10 | insulin-like growth factor receptor  
BTGA11 | protein kinase C beta  
BTGA12 | protein kinase C delta  
BTGA13 | epidermal growth factor receptor  
BTGA14 | epidermal growth factor receptor  
BTGA15 | epidermal growth factor receptor  
BTGA16 | epidermal growth factor receptor  
BTGA17 | epidermal growth factor receptor  
BTGA18 | epidermal growth factor receptor  
BTGA19 | epidermal growth factor receptor  
BTGA20 | epidermal growth factor receptor  
BTGA21 | epidermal growth factor receptor  
BTGA22 | epidermal growth factor receptor  
BTGA23 | epidermal growth factor receptor  
BTGA24 | epidermal growth factor receptor  
BTGA25 | epidermal growth factor receptor  
BTGA26 | epidermal growth factor receptor  
BTGA27 | epidermal growth factor receptor  
BTGA28 | epidermal growth factor receptor  
BTGA29 | epidermal growth factor receptor  
BTGA30 | epidermal growth factor receptor  
BTGA31 | epidermal growth factor receptor  
BTGA32 | epidermal growth factor receptor  
BTGA33 | epidermal growth factor receptor  
BTGA34 | epidermal growth factor receptor  
BTGA35 | epidermal growth factor receptor  
BTGA36 | epidermal growth factor receptor  
BTGA37 | epidermal growth factor receptor  
BTGA38 | epidermal growth factor receptor  
BTGA39 | epidermal growth factor receptor  
BTGA40 | epidermal growth factor receptor  
BTGA41 | epidermal growth factor receptor  
BTGA42 | epidermal growth factor receptor  
BTGA43 | epidermal growth factor receptor  
BTGA44 | epidermal growth factor receptor  
BTGA45 | epidermal growth factor receptor  
BTGA46 | epidermal growth factor receptor  
BTGA47 | epidermal growth factor receptor  
BTGA48 | epidermal growth factor receptor  
BTGA49 | epidermal growth factor receptor  
BTGA50 | epidermal growth factor receptor  
BTGA51 | epidermal growth factor receptor  
BTGA52 | epidermal growth factor receptor  
BTGA53 | epidermal growth factor receptor  
BTGA54 | epidermal growth factor receptor  
BTGA55 | epidermal growth factor receptor  
BTGA56 | epidermal growth factor receptor  
BTGA57 | epidermal growth factor receptor  
BTGA58 | epidermal growth factor receptor  
BTGA59 | epidermal growth factor receptor  
BTGA60 | epidermal growth factor receptor  
BTGA61 | epidermal growth factor receptor  
BTGA62 | epidermal growth factor receptor  
BTGA63 | epidermal growth factor receptor  
BTGA64 | epidermal growth factor receptor  
BTGA65 | epidermal growth factor receptor  
BTGA66 | epidermal growth factor receptor  
BTGA67 | epidermal growth factor receptor  
BTGA68 | epidermal growth factor receptor  
BTGA69 | epidermal growth factor receptor  
BTGA70 | epidermal growth factor receptor  
BTGA71 | epidermal growth factor receptor  
BTGA72 | epidermal growth factor receptor  
BTGA73 | epidermal growth factor receptor  
BTGA74 | epidermal growth factor receptor  
BTGA75 | epidermal growth factor receptor  
BTGA76 | epidermal growth factor receptor  
BTGA77 | epidermal growth factor receptor  
BTGA78 | epidermal growth factor receptor  
BTGA79 | epidermal growth factor receptor  
BTGA80 | epidermal growth factor receptor  
BTGA81 | epidermal growth factor receptor  
BTGA82 | epidermal growth factor receptor  
BTGA83 | epidermal growth factor receptor  
BTGA84 | epidermal growth factor receptor  
BTGA85 | epidermal growth factor receptor  
BTGA86 | epidermal growth factor receptor  
BTGA87 | epidermal growth factor receptor  
BTGA88 | epidermal growth factor receptor  
BTGA89 | epidermal growth factor receptor  
BTGA90 | epidermal growth factor receptor  
BTGA91 | epidermal growth factor receptor  
BTGA92 | epidermal growth factor receptor  
BTGA93 | epidermal growth factor receptor  
BTGA94 | epidermal growth factor receptor  
BTGA95 | epidermal growth factor receptor  
BTGA96 | epidermal growth factor receptor  
BTGA97 | epidermal growth factor receptor  
BTGA98 | epidermal growth factor receptor  
BTGA99 | epidermal growth factor receptor  
BTGA100 | epidermal growth factor receptor

Cancer

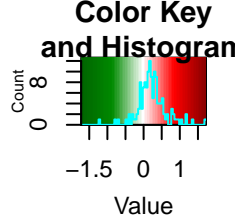

# Renal cell carcinoma hsa05211

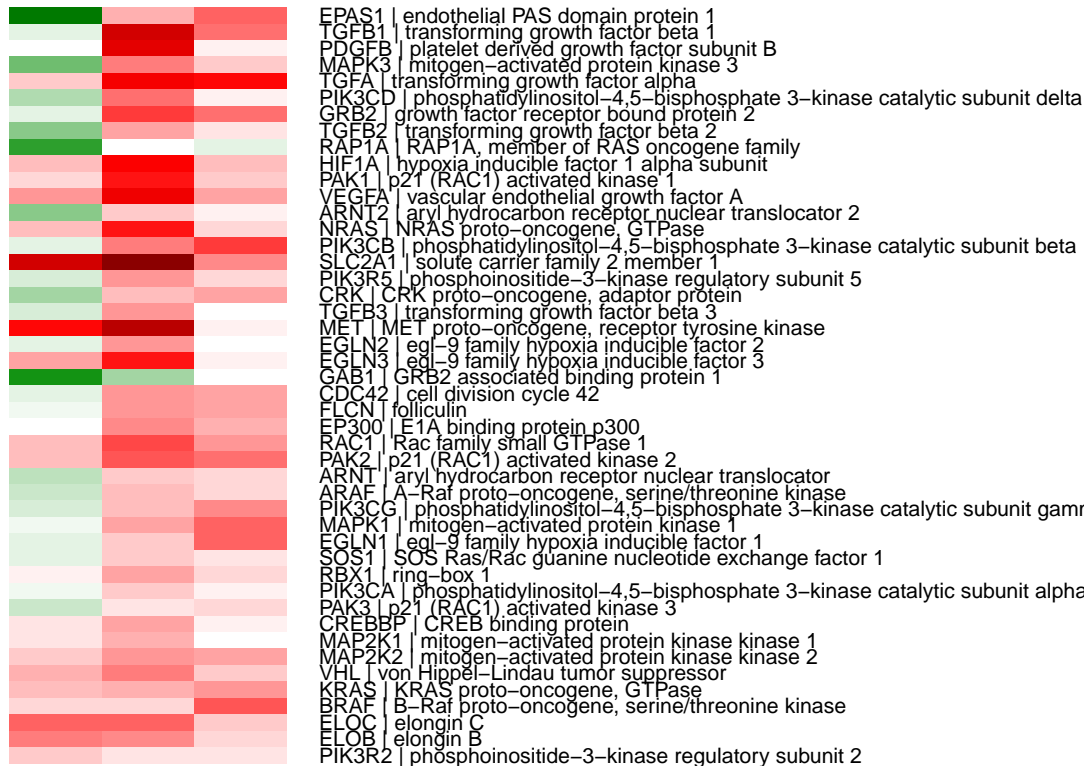

CA

SLC

SS

Cancer

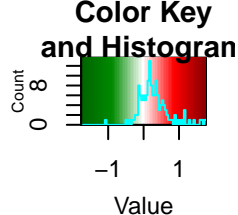

## Pancreatic cancer hsa05212

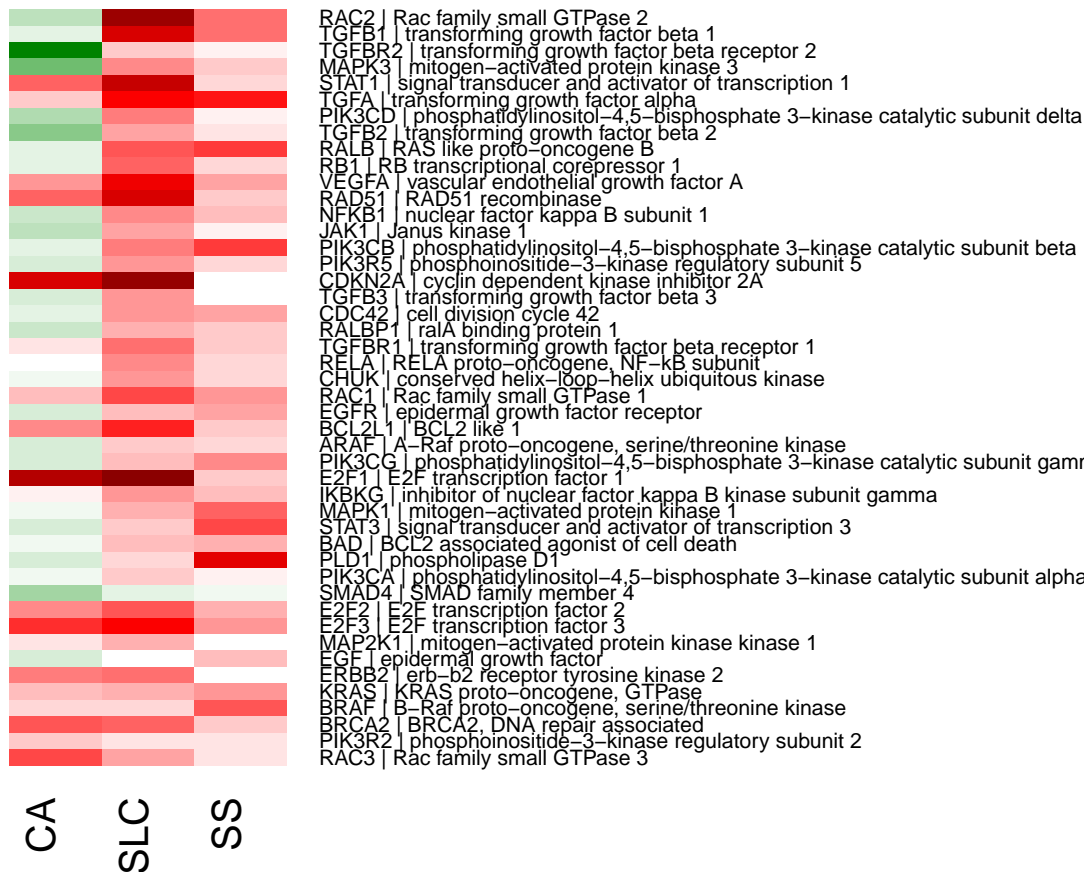

Cancer



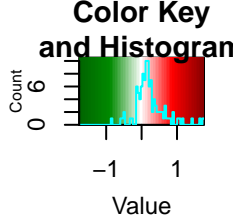

## Glioma hsa05214

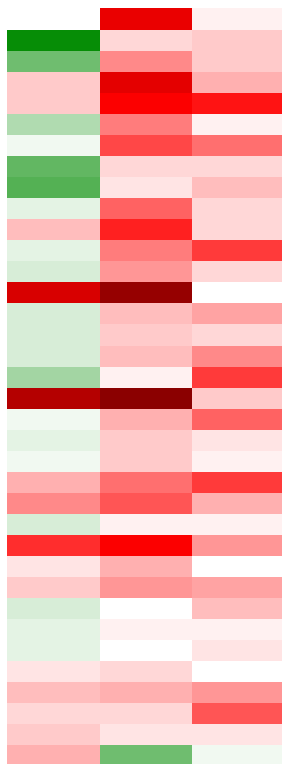

CA

SLC

SS

PDGFB | platelet derived growth factor subunit B  
 PRKCB | protein kinase C beta  
 MAPK3 | mitogen-activated protein kinase 3  
 SHC1 | SHC adaptor protein 1  
 TGFA | transforming growth factor alpha  
 PIK3CD | phosphatidylinositol-4,5-bisphosphate 3-kinase catalytic subunit delta  
 GRB2 | growth factor receptor bound protein 2  
 PLCG2 | phospholipase C gamma 2  
 CAMK2G | calcium/calmodulin dependent protein kinase II gamma  
 RB1 | RB transcriptional corepressor 1  
 NRAS | NRAS proto-oncogene, GTPase  
 PIK3CB | phosphatidylinositol-4,5-bisphosphate 3-kinase catalytic subunit beta  
 PIK3R5 | phosphoinositide-3-kinase regulatory subunit 5  
 CDKN2A | cyclin dependent kinase inhibitor 2A  
 EGFR | epidermal growth factor receptor  
 ARAF | A-Raf proto-oncogene, serine/threonine kinase  
 PIK3CG | phosphatidylinositol-4,5-bisphosphate 3-kinase catalytic subunit gamma  
 PTEN | phosphatase and tensin homolog  
 E2F1 | E2F transcription factor 1  
 MAPK1 | mitogen-activated protein kinase 1  
 SOS1 | SOS Ras/Rac guanine nucleotide exchange factor 1  
 PIK3CA | phosphatidylinositol-4,5-bisphosphate 3-kinase catalytic subunit alpha  
 MDM2 | MDM2 proto-oncogene  
 E2F2 | E2F transcription factor 2  
 SHC3 | SHC adaptor protein 3  
 E2F3 | E2F transcription factor 3  
 MAP2K1 | mitogen-activated protein kinase kinase 1  
 MAP2K2 | mitogen-activated protein kinase kinase 2  
 EGF | epidermal growth factor  
 SHC2 | SHC adaptor protein 2  
 SHC4 | SHC adaptor protein 4  
 PRKCG | protein kinase C gamma  
 KRAS | KRAS proto-oncogene, GTPase  
 BRAF | B-Raf proto-oncogene, serine/threonine kinase  
 PIK3R2 | phosphoinositide-3-kinase regulatory subunit 2  
 CALML3 | calmodulin like 3

Cancer

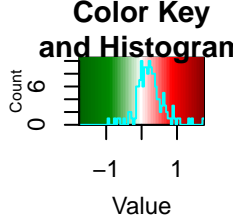

## Prostate cancer hsa05215

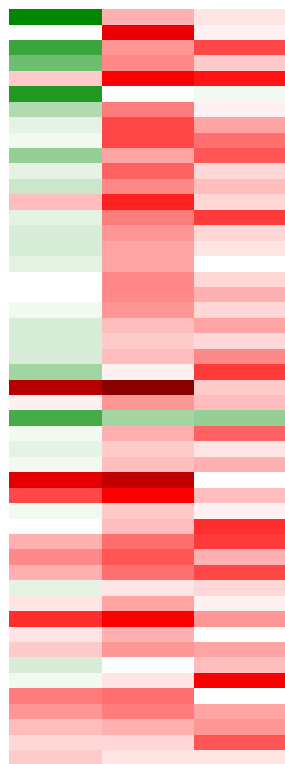

CA

SLC

SS

TCF7L1 | transcription factor 7 like 1  
 PDGFB | platelet derived growth factor subunit B  
 NFKB1A | NF-kB inhibitor alpha  
 MAPK3 | mitogen-activated protein kinase 3  
 TGF- $\alpha$  | transforming growth factor alpha  
 BCL2 | BCL2, apoptosis regulator  
 PIK3CD | phosphatidylinositol-4,5-bisphosphate 3-kinase catalytic subunit delta  
 CTNNB1 | catenin beta 1  
 GRB2 | growth factor receptor bound protein 2  
 TCF7L2 | transcription factor 7 like 2  
 POU1F1 | transcriptional corepressor 1  
 NFKB1 | nuclear factor kappa B subunit 1  
 NRAS | NRAS proto-oncogene, GTPase  
 PIK3CB | phosphatidylinositol-4,5-bisphosphate 3-kinase catalytic subunit beta  
 PIK3R5 | phosphoinositide-3-kinase regulatory subunit 5  
 CREB3 | cAMP responsive element binding protein 3  
 CREB3L2 | cAMP responsive element binding protein 3 like 2  
 RELA | RELA proto-oncogene, NF-kB subunit  
 E2F1 | E2F transcription factor 1  
 E1A | E1A binding protein p300  
 CHUK | conserved helix-loop-helix ubiquitous kinase  
 EGFR | epidermal growth factor receptor  
 ARAF | A-Raf proto-oncogene, serine/threonine kinase  
 PIK3CG | phosphatidylinositol-4,5-bisphosphate 3-kinase catalytic subunit gamma  
 PTEN | phosphatase and tensin homolog  
 E2F1 | E2F transcription factor 1  
 IKKKG | inhibitor of nuclear factor kappa B kinase subunit gamma  
 FOXO1 | forkhead box O1  
 MAPK1 | mitogen-activated protein kinase 1  
 SOS1 | SOS Ras/Rac guanine nucleotide exchange factor 1  
 BAD | BCL2 associated agonist of cell death  
 CCNE1 | cyclin E1  
 CDK2 | cyclin dependent kinase 2  
 PIK3CA | phosphatidylinositol-4,5-bisphosphate 3-kinase catalytic subunit alpha  
 CREB5 | cAMP responsive element binding protein 5  
 MDM2 | MDM2 proto-oncogene  
 E2F1 | E2F transcription factor 1  
 E2F2 | E2F transcription factor 2  
 GSK3B | glycogen synthase kinase 3 beta  
 PIK3R4 | phosphoinositide dependent protein kinase 1  
 OREBP | CREB binding protein  
 E2F3 | E2F transcription factor 3  
 MAP2K1 | mitogen-activated protein kinase kinase 1  
 MAP2K2 | mitogen-activated protein kinase kinase 2  
 EGF | epidermal growth factor  
 PDGFC | platelet derived growth factor C  
 ERBB2 | erb-b2 receptor tyrosine kinase 2  
 CCNE2 | cyclin E2  
 KRAS | KRAS proto-oncogene, GTPase  
 BRAF | B-Raf proto-oncogene, serine/threonine kinase  
 PIK3R2 | phosphoinositide-3-kinase regulatory subunit 2

Cancer

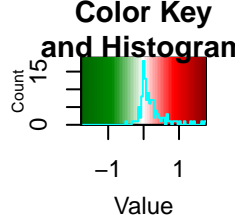

## Melanoma hsa05218

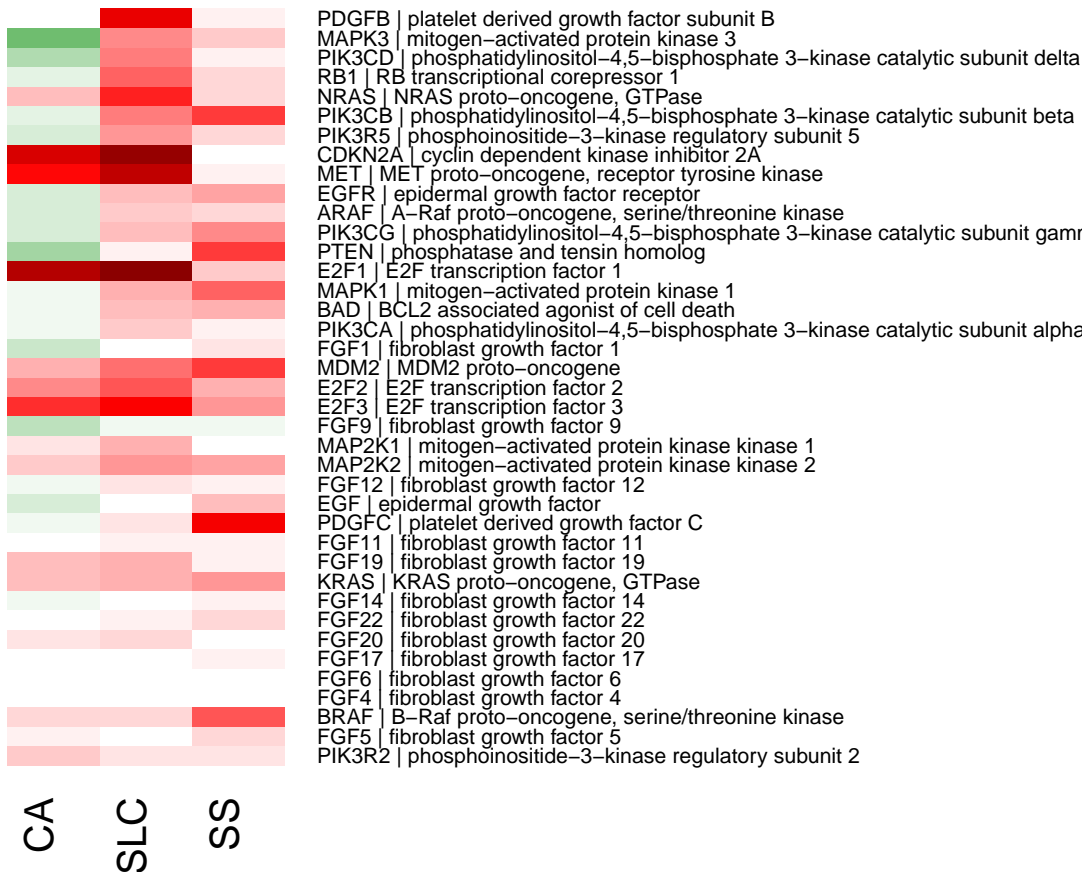

Cancer

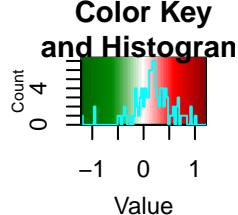

# Acute myeloid leukemia hsa05221

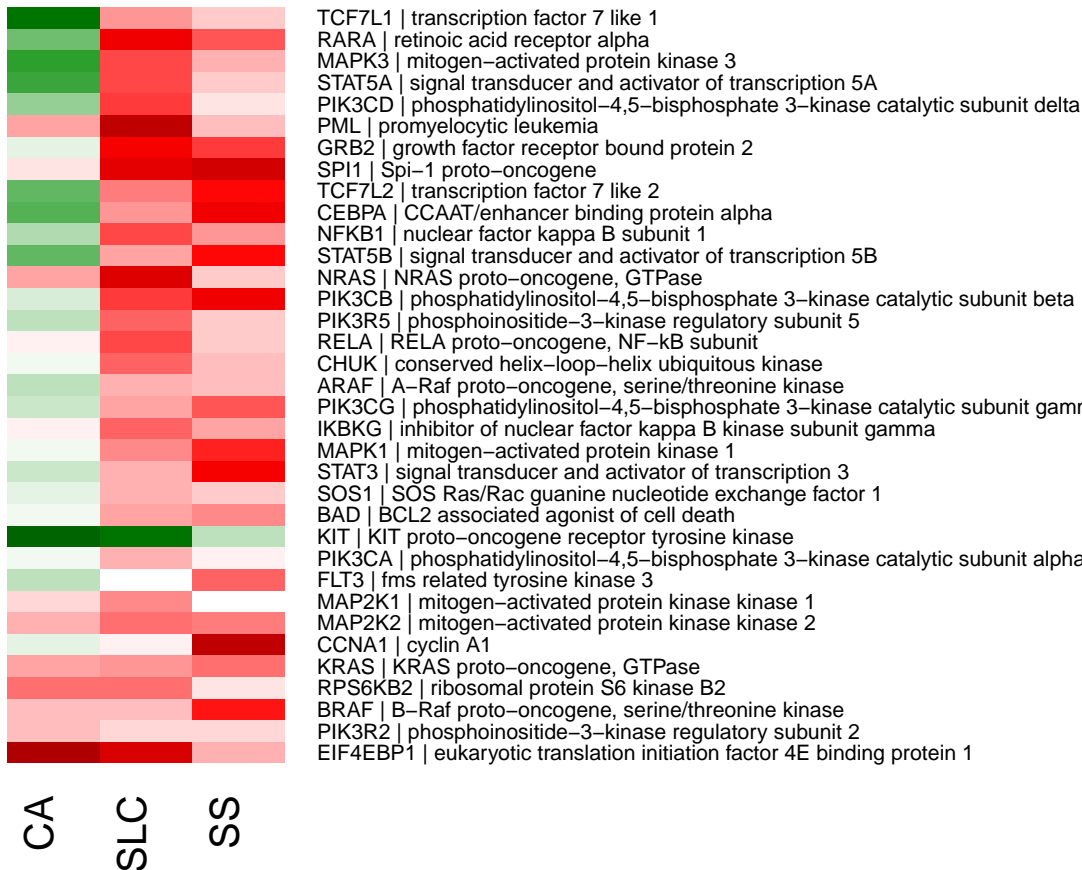

Cancer

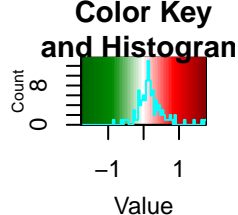

# Non-small cell lung cancer hsa05223

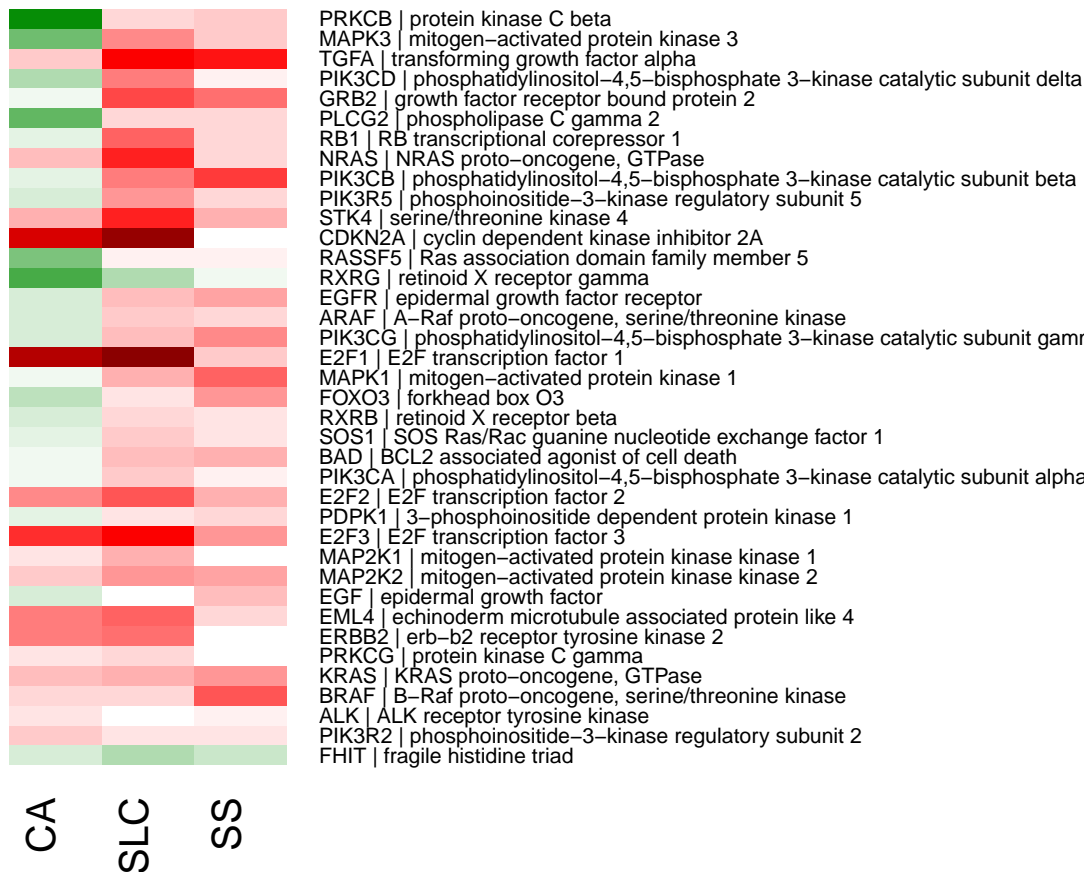

Cancer

# Central carbon metabolism in cancer

## hsa05230

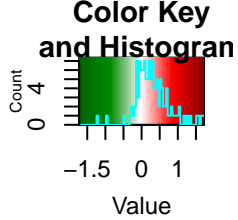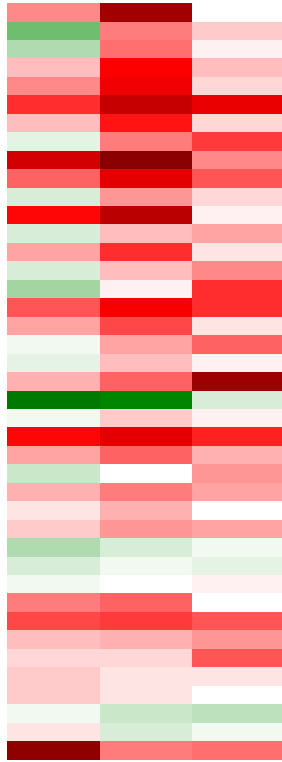

CA

SLC

SS

HKDC1 | hexokinase domain containing 1  
 MAPK3 | mitogen-activated protein kinase 3  
 PIK3CD | phosphatidylinositol-4,5-bisphosphate 3-kinase catalytic subunit delta  
 HIF1A | hypoxia inducible factor 1 alpha subunit  
 SLC1A5 | solute carrier family 1 member 5  
 SLC16A3 | solute carrier family 16 member 3  
 NRAS | NRAS proto-oncogene, GTPase  
 PIK3CB | phosphatidylinositol-4,5-bisphosphate 3-kinase catalytic subunit beta  
 SLC2A1 | solute carrier family 2 member 1  
 HK2 | hexokinase 2  
 PIK3R5 | phosphoinositide-3-kinase regulatory subunit 5  
 MET | MET proto-oncogene, receptor tyrosine kinase  
 EGFR | epidermal growth factor receptor  
 SIRT6 | sirtuin 6  
 PIK3CG | phosphatidylinositol-4,5-bisphosphate 3-kinase catalytic subunit gamma  
 PTEN | phosphatase and tensin homolog  
 G6PD | glucose-6-phosphate dehydrogenase  
 TIGAR | TP53 induced glycolysis regulatory phosphatase  
 MAPK1 | mitogen-activated protein kinase 1  
 FGFR3 | fibroblast growth factor receptor 3  
 HK3 | hexokinase 3  
 KIT | KIT proto-oncogene receptor tyrosine kinase  
 PIK3CA | phosphatidylinositol-4,5-bisphosphate 3-kinase catalytic subunit alpha  
 PKM | pyruvate kinase M1/2  
 SCO2 | SCO2, cytochrome c oxidase assembly protein  
 FLT3 | fms related tyrosine kinase 3  
 PGAM1 | phosphoglycerate mutase 1  
 MAP2K1 | mitogen-activated protein kinase kinase 1  
 MAP2K2 | mitogen-activated protein kinase kinase 2  
 NTRK3 | neurotrophic receptor tyrosine kinase 3  
 PFKM | phosphofructokinase, muscle  
 SIRT3 | sirtuin 3  
 ERBB2 | erb-b2 receptor tyrosine kinase 2  
 LDHA | lactate dehydrogenase A  
 KRAS | KRAS proto-oncogene, GTPase  
 IDH1 | isocitrate dehydrogenase (NADP(+)) 1, cytosolic  
 PIK3R2 | phosphoinositide-3-kinase regulatory subunit 2  
 PDHA1 | pyruvate dehydrogenase E1 alpha 1 subunit  
 PDHB | pyruvate dehydrogenase E1 beta subunit  
 GLS2 | glutaminase 2  
 SLC7A5 | solute carrier family 7 member 5

Cancer

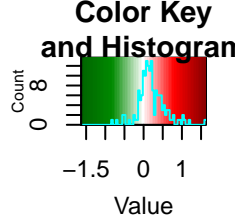

# Choline metabolism in cancer

## hsa05231

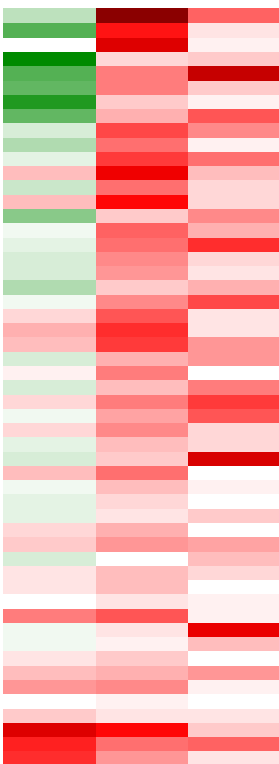

CA

SLC

SS

RAC2 | Rac family small GTPase 2  
 DC2A4 | solute carrier family 44 member 4  
 RGCB | protein kinase C beta  
 SLC22A4 | solute carrier family 22 member 4  
 MAPK3 | mitogen-activated protein kinase 3  
 PIP5K1B | phosphatidylinositol-4-phosphate 5-kinase type 1 beta  
 A2G4A | phospholipase A2 group IVA  
 SLC44A1 | solute carrier family 44 member 1  
 GRK3CD | phosphatidylinositol-4,5-bisphosphate 3-kinase catalytic subunit delta  
 GRB2 | growth factor receptor bound protein 2  
 HIF1A | hypoxia inducible factor 1 alpha subunit  
 KIF5A | kinesin family class I member 5A  
 WASF2 | WAS protein family member 2  
 WAS | Wiskott-Aldrich syndrome  
 PI3K3CB | phosphatidylinositol-4,5-bisphosphate 3-kinase catalytic subunit beta  
 PI3K3R5 | phosphoinositide-3-kinase regulatory subunit 5  
 SLC44A3 | solute carrier family 44 member 3  
 GPCPD1 | glycerophosphocholine phosphodiesterase 1  
 SLC44A5 | solute carrier family 44 member 5  
 HEB | Ras homolog m QRC1 binding  
 RAC1 | Rac family small GTPase 1  
 EGFR | epidermal growth factor receptor  
 DGKH | diacylglycerol kinase eta  
 PI3K3CG | phosphatidylinositol-4,5-bisphosphate 3-kinase catalytic subunit gamma  
 SP1 | transcription factor  
 MAPK1 | mitogen-activated protein kinase 1  
 PI3K3D | phosphoinositide 3-kinase  
 SOS1 | SOS Ras/Rac guanine nucleotide exchange factor 1  
 PI3K3A | phosphatidylinositol-4-phosphate 5-kinase type 1 alpha  
 PI3K3CA | phosphatidylinositol-4,5-bisphosphate 3-kinase catalytic subunit alpha  
 DGKG | diacylglycerol kinase gamma  
 PDK1 | 3-phosphoinositide dependent protein kinase 1  
 MAP2K1 | mitogen-activated protein kinase kinase 1  
 MAP2K2 | mitogen-activated protein kinase kinase 2  
 EGF | epidermal growth factor  
 WASL | Wiskott-Aldrich syndrome like  
 SLC22A5 | solute carrier family 22 member 5  
 DGKI | diacylglycerol kinase iota  
 WASE1 | WAS protein family member 1  
 PDGEC | platelet derived growth factor C  
 PCYT1B | phosphate cytidylyltransferase 1, choline, beta  
 PRKCG | protein kinase C gamma  
 KRAS | KRAS proto-oncogene, GTPase  
 RPS6KB2 | ribosomal protein S6 kinase B2  
 ESCR2 | ESC complex subunit 2  
 PI3K3R2 | phosphoinositide-3-kinase regulatory subunit 2  
 EIF4EBP1 | eukaryotic translation initiation factor 4E binding protein 1  
 LYPLA1 | lysophospholipase I  
 RAC3 | Rac family small GTPase 3

Cancer

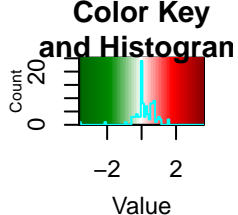

# Glycolysis / Gluconeogenesis

## hsa00010

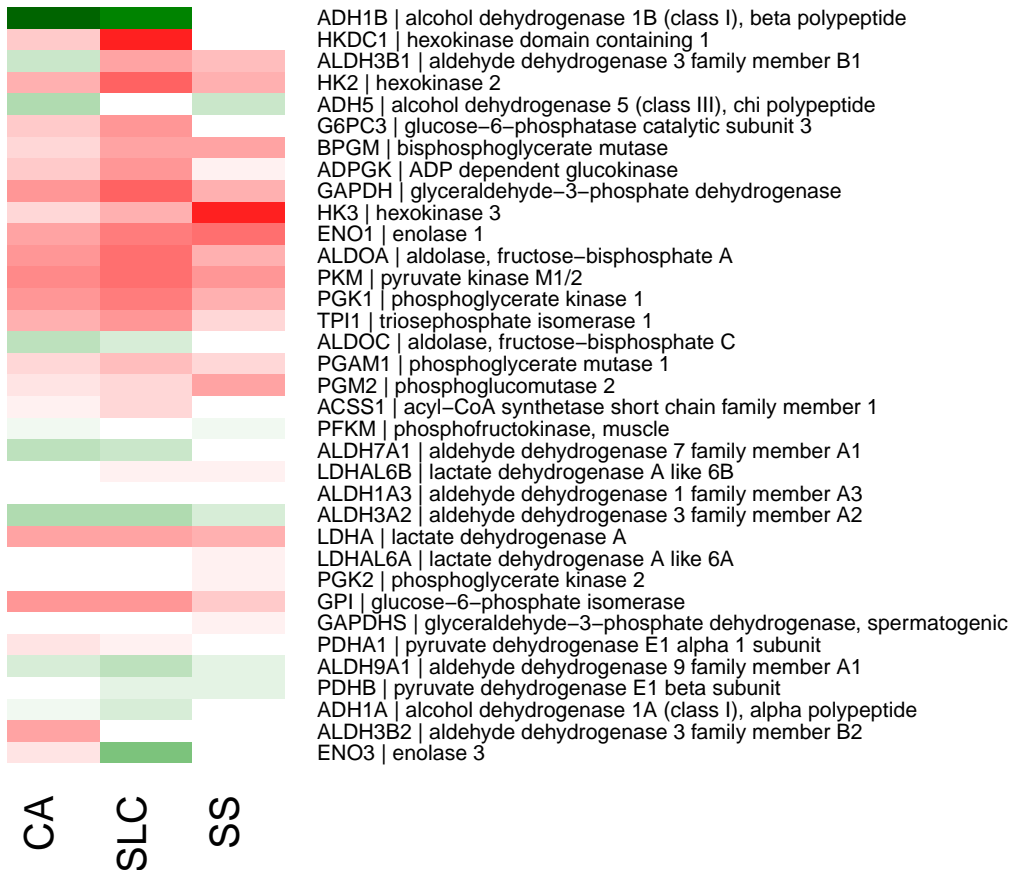

Carbohydrate metabolism



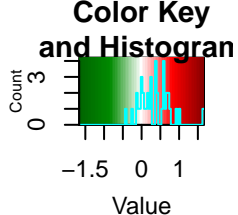

## Pentose phosphate pathway hsa00030

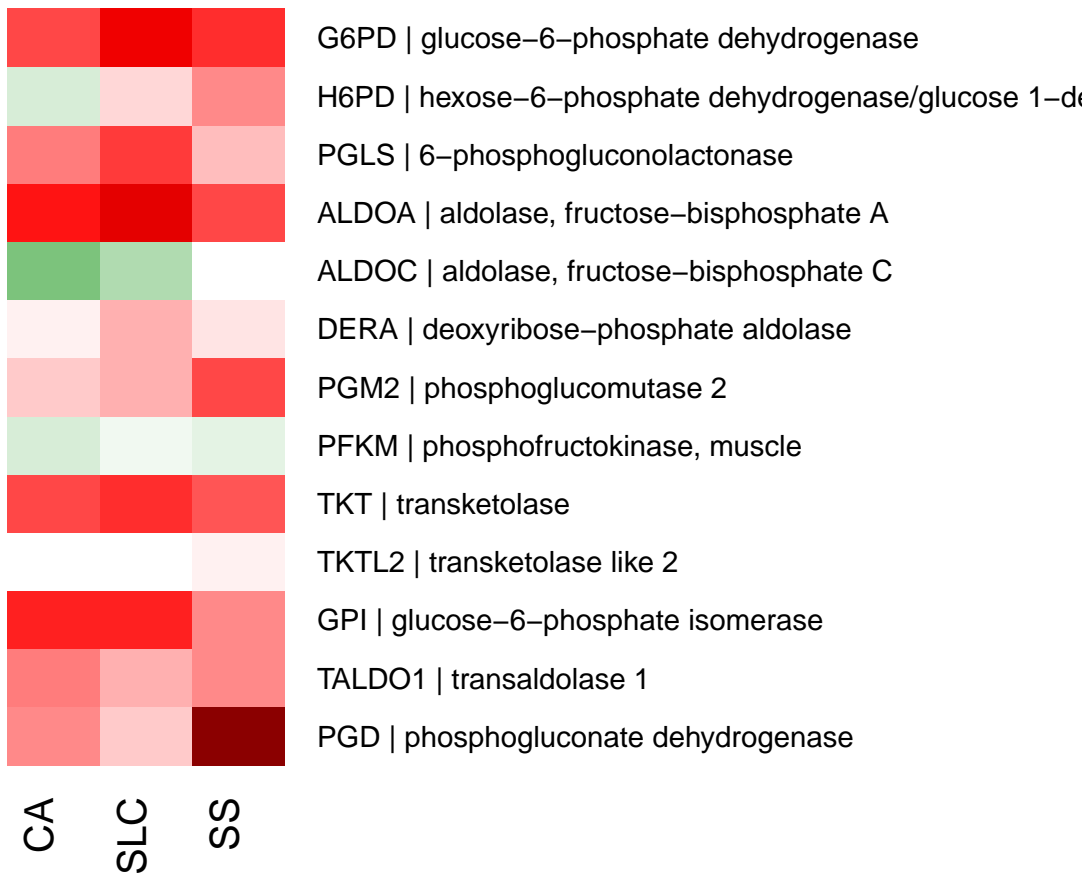

Carbohydrate metabolism

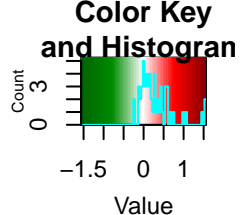

## Galactose metabolism hsa00052

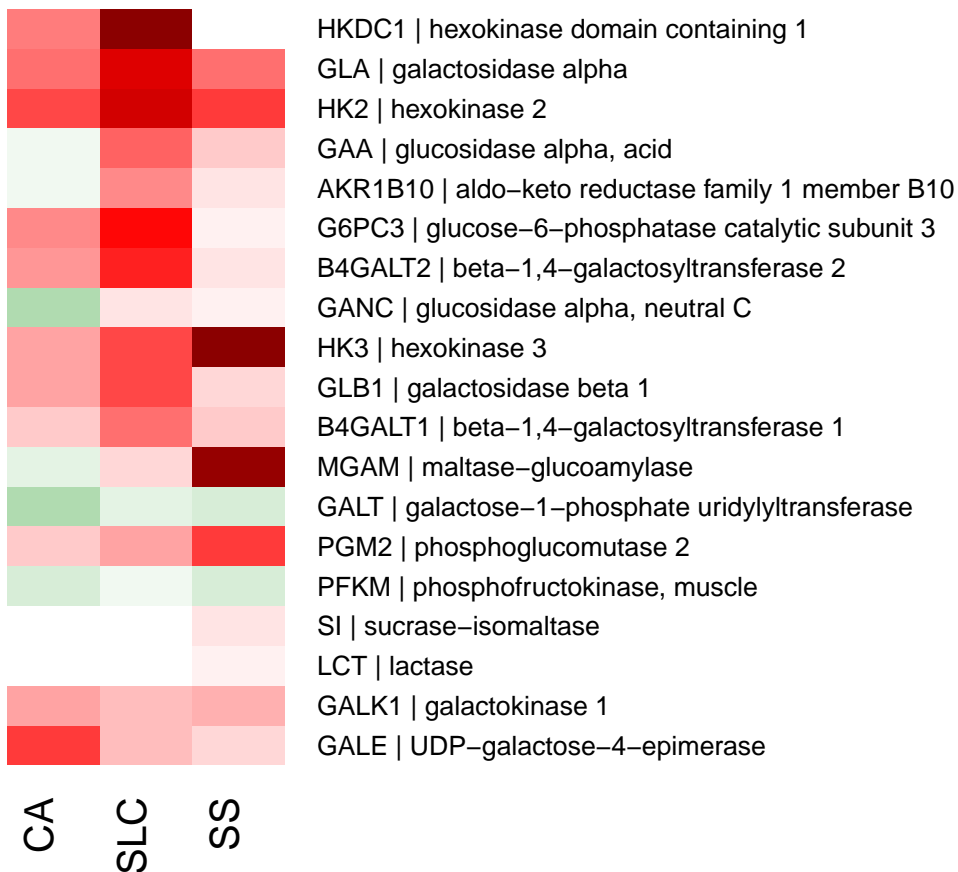

Carbohydrate metabolism

# Ovarian steroidogenesis hsa04913

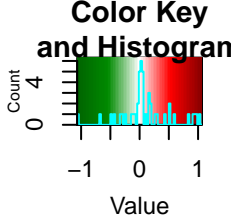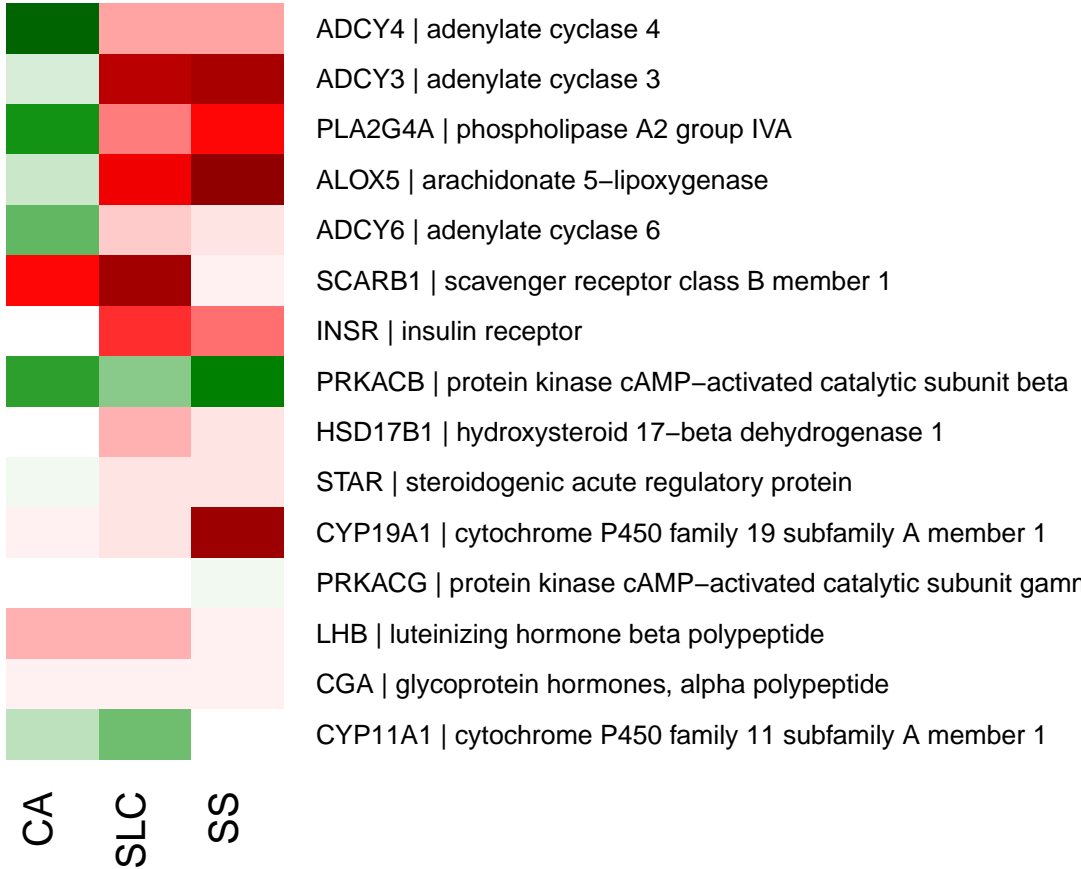

Endocrine system

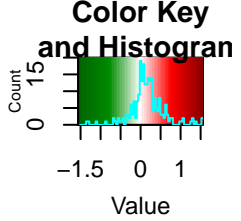

# Insulin signaling pathway

## hsa04910

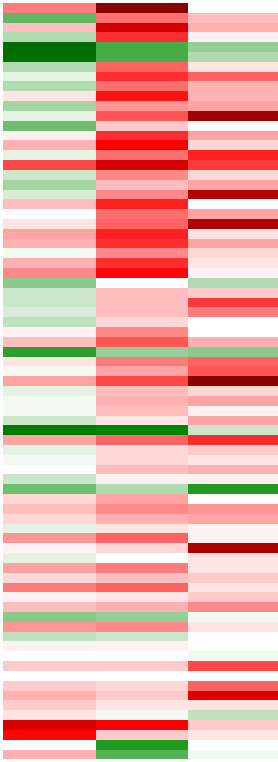

CA

SLC

SS

- HKDC1 | hexokinase domain containing 1
- MAPK3 | mitogen-activated protein kinase 3
- SH2B1 | SH2 domain containing protein 1
- SH2B2 | SH2 domain containing protein 2
- SH2B3 | SH2 domain containing protein 3
- SH2B4 | SH2 domain containing protein 4
- SH2B5 | SH2 domain containing protein 5
- SH2B6 | SH2 domain containing protein 6
- SH2B7 | SH2 domain containing protein 7
- SH2B8 | SH2 domain containing protein 8
- SH2B9 | SH2 domain containing protein 9
- SH2B10 | SH2 domain containing protein 10
- SH2B11 | SH2 domain containing protein 11
- SH2B12 | SH2 domain containing protein 12
- SH2B13 | SH2 domain containing protein 13
- SH2B14 | SH2 domain containing protein 14
- SH2B15 | SH2 domain containing protein 15
- SH2B16 | SH2 domain containing protein 16
- SH2B17 | SH2 domain containing protein 17
- SH2B18 | SH2 domain containing protein 18
- SH2B19 | SH2 domain containing protein 19
- SH2B20 | SH2 domain containing protein 20
- SH2B21 | SH2 domain containing protein 21
- SH2B22 | SH2 domain containing protein 22
- SH2B23 | SH2 domain containing protein 23
- SH2B24 | SH2 domain containing protein 24
- SH2B25 | SH2 domain containing protein 25
- SH2B26 | SH2 domain containing protein 26
- SH2B27 | SH2 domain containing protein 27
- SH2B28 | SH2 domain containing protein 28
- SH2B29 | SH2 domain containing protein 29
- SH2B30 | SH2 domain containing protein 30
- SH2B31 | SH2 domain containing protein 31
- SH2B32 | SH2 domain containing protein 32
- SH2B33 | SH2 domain containing protein 33
- SH2B34 | SH2 domain containing protein 34
- SH2B35 | SH2 domain containing protein 35
- SH2B36 | SH2 domain containing protein 36
- SH2B37 | SH2 domain containing protein 37
- SH2B38 | SH2 domain containing protein 38
- SH2B39 | SH2 domain containing protein 39
- SH2B40 | SH2 domain containing protein 40
- SH2B41 | SH2 domain containing protein 41
- SH2B42 | SH2 domain containing protein 42
- SH2B43 | SH2 domain containing protein 43
- SH2B44 | SH2 domain containing protein 44
- SH2B45 | SH2 domain containing protein 45
- SH2B46 | SH2 domain containing protein 46
- SH2B47 | SH2 domain containing protein 47
- SH2B48 | SH2 domain containing protein 48
- SH2B49 | SH2 domain containing protein 49
- SH2B50 | SH2 domain containing protein 50
- SH2B51 | SH2 domain containing protein 51
- SH2B52 | SH2 domain containing protein 52
- SH2B53 | SH2 domain containing protein 53
- SH2B54 | SH2 domain containing protein 54
- SH2B55 | SH2 domain containing protein 55
- SH2B56 | SH2 domain containing protein 56
- SH2B57 | SH2 domain containing protein 57
- SH2B58 | SH2 domain containing protein 58
- SH2B59 | SH2 domain containing protein 59
- SH2B60 | SH2 domain containing protein 60
- SH2B61 | SH2 domain containing protein 61
- SH2B62 | SH2 domain containing protein 62
- SH2B63 | SH2 domain containing protein 63
- SH2B64 | SH2 domain containing protein 64
- SH2B65 | SH2 domain containing protein 65
- SH2B66 | SH2 domain containing protein 66
- SH2B67 | SH2 domain containing protein 67
- SH2B68 | SH2 domain containing protein 68
- SH2B69 | SH2 domain containing protein 69
- SH2B70 | SH2 domain containing protein 70
- SH2B71 | SH2 domain containing protein 71
- SH2B72 | SH2 domain containing protein 72
- SH2B73 | SH2 domain containing protein 73
- SH2B74 | SH2 domain containing protein 74
- SH2B75 | SH2 domain containing protein 75
- SH2B76 | SH2 domain containing protein 76
- SH2B77 | SH2 domain containing protein 77
- SH2B78 | SH2 domain containing protein 78
- SH2B79 | SH2 domain containing protein 79
- SH2B80 | SH2 domain containing protein 80
- SH2B81 | SH2 domain containing protein 81
- SH2B82 | SH2 domain containing protein 82
- SH2B83 | SH2 domain containing protein 83
- SH2B84 | SH2 domain containing protein 84
- SH2B85 | SH2 domain containing protein 85
- SH2B86 | SH2 domain containing protein 86
- SH2B87 | SH2 domain containing protein 87
- SH2B88 | SH2 domain containing protein 88
- SH2B89 | SH2 domain containing protein 89
- SH2B90 | SH2 domain containing protein 90
- SH2B91 | SH2 domain containing protein 91
- SH2B92 | SH2 domain containing protein 92
- SH2B93 | SH2 domain containing protein 93
- SH2B94 | SH2 domain containing protein 94
- SH2B95 | SH2 domain containing protein 95
- SH2B96 | SH2 domain containing protein 96
- SH2B97 | SH2 domain containing protein 97
- SH2B98 | SH2 domain containing protein 98
- SH2B99 | SH2 domain containing protein 99
- SH2B100 | SH2 domain containing protein 100

Endocrine system

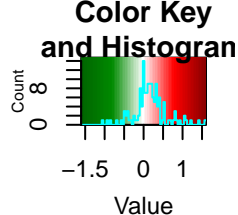

# GnRH signaling pathway

## hsa04912

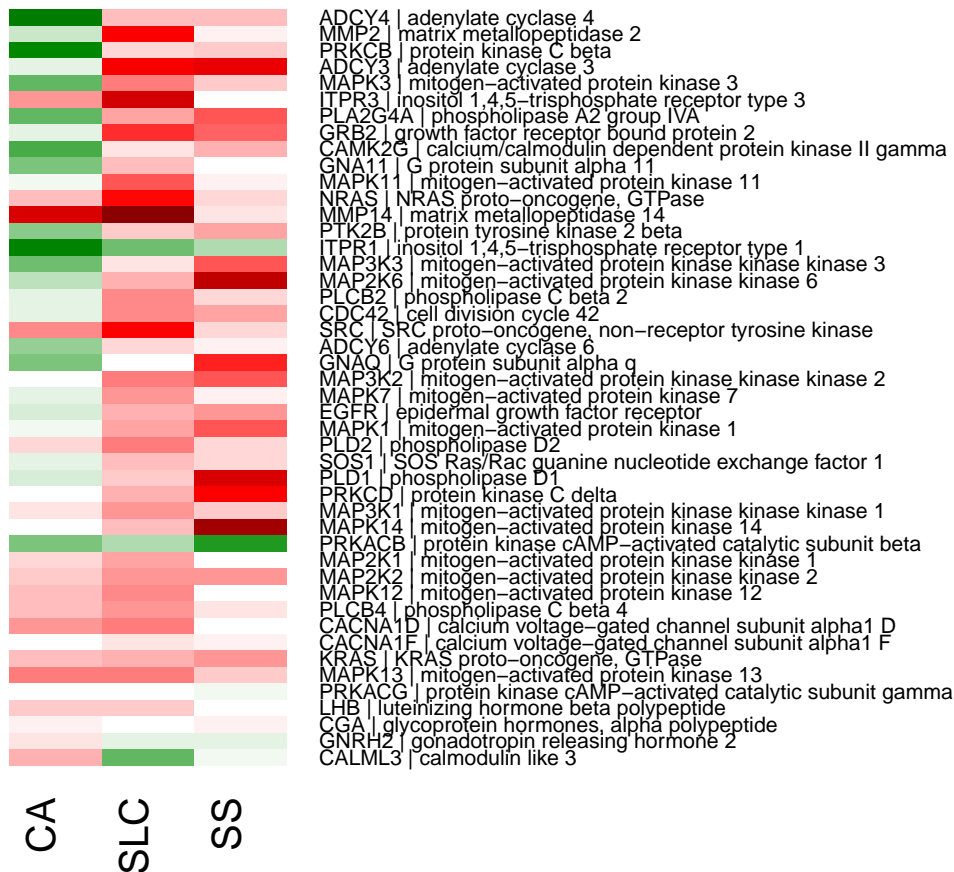

Endocrine system

# Progesterone-mediated oocyte maturation

hsa04914

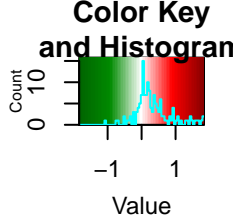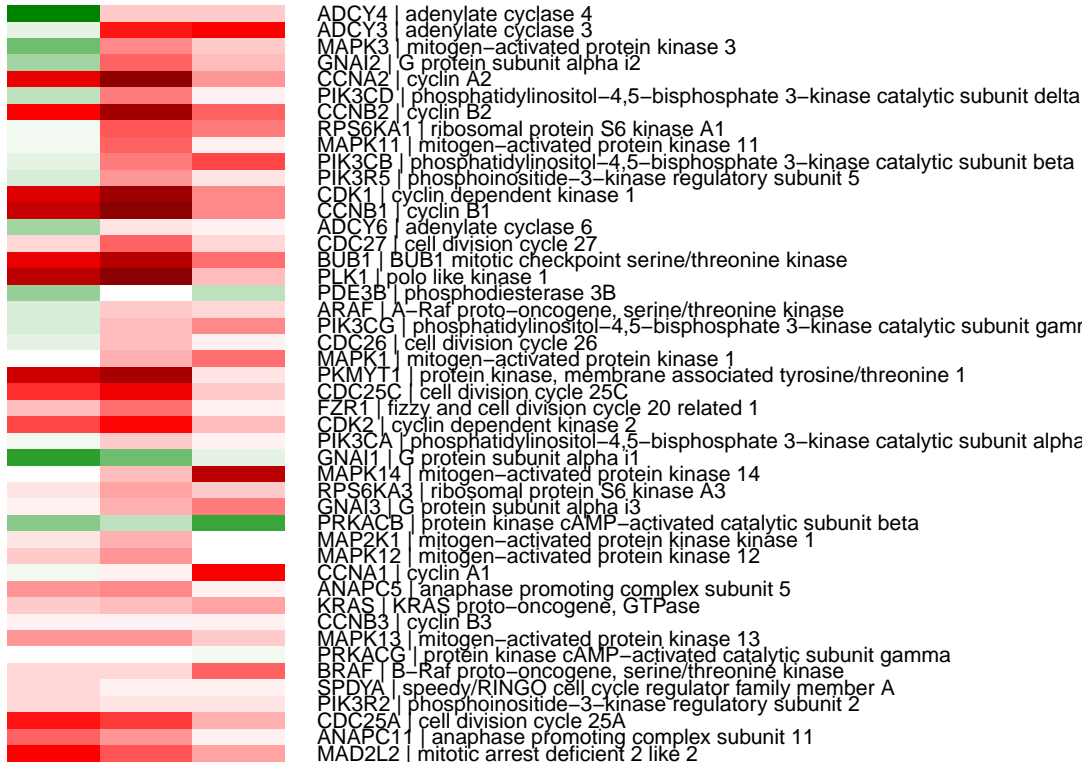

CA

SLC

SS

Endocrine system

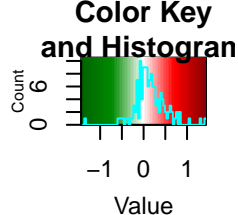

# Prolactin signaling pathway

## hsa04917

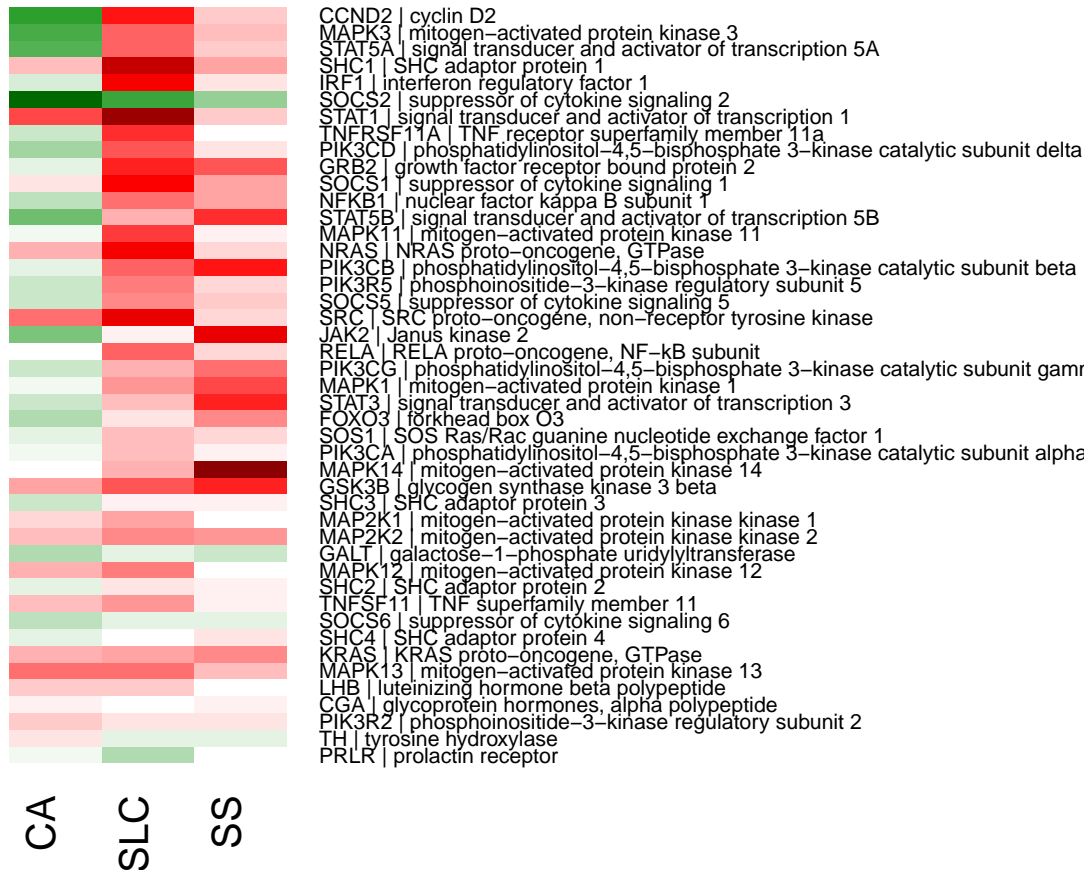

Endocrine system

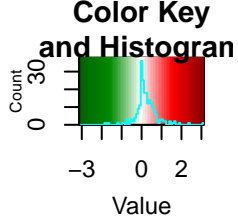

# Leukocyte transendothelial migration

## hsa04670

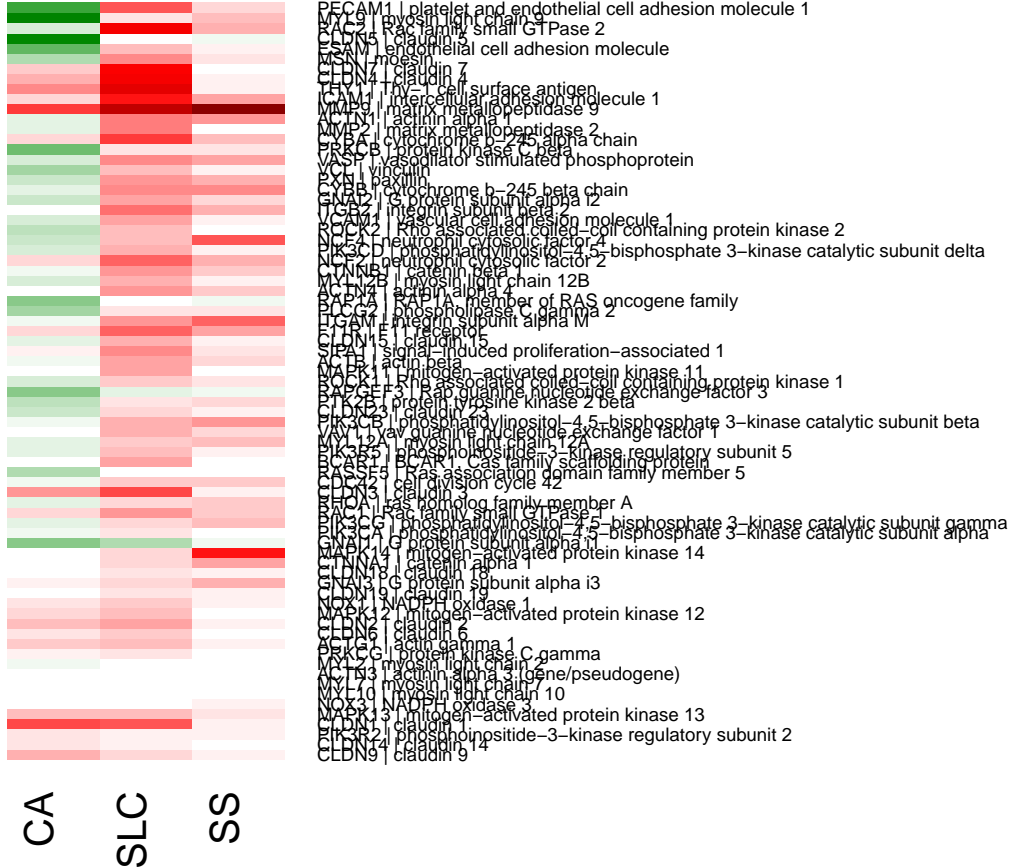

Immune system



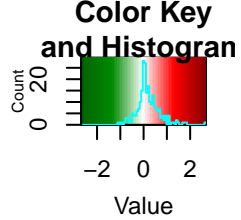

# Platelet activation hsa04611

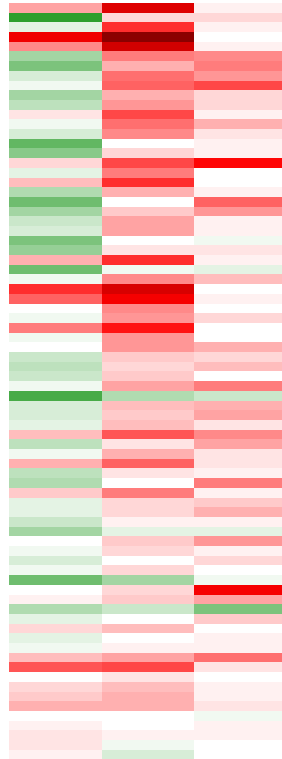

CA

SLC

SS

COL1A2 | collagen type I alpha 2 chain  
ADP1A1 | adenosine diphosphate  
ADP1A2 | adenosine diphosphate  
ADP1A3 | adenosine diphosphate  
ADP1A4 | adenosine diphosphate  
ADP1A5 | adenosine diphosphate  
ADP1A6 | adenosine diphosphate  
ADP1A7 | adenosine diphosphate  
ADP1A8 | adenosine diphosphate  
ADP1A9 | adenosine diphosphate  
ADP1A10 | adenosine diphosphate  
ADP1A11 | adenosine diphosphate  
ADP1A12 | adenosine diphosphate  
ADP1A13 | adenosine diphosphate  
ADP1A14 | adenosine diphosphate  
ADP1A15 | adenosine diphosphate  
ADP1A16 | adenosine diphosphate  
ADP1A17 | adenosine diphosphate  
ADP1A18 | adenosine diphosphate  
ADP1A19 | adenosine diphosphate  
ADP1A20 | adenosine diphosphate  
ADP1A21 | adenosine diphosphate  
ADP1A22 | adenosine diphosphate  
ADP1A23 | adenosine diphosphate  
ADP1A24 | adenosine diphosphate  
ADP1A25 | adenosine diphosphate  
ADP1A26 | adenosine diphosphate  
ADP1A27 | adenosine diphosphate  
ADP1A28 | adenosine diphosphate  
ADP1A29 | adenosine diphosphate  
ADP1A30 | adenosine diphosphate  
ADP1A31 | adenosine diphosphate  
ADP1A32 | adenosine diphosphate  
ADP1A33 | adenosine diphosphate  
ADP1A34 | adenosine diphosphate  
ADP1A35 | adenosine diphosphate  
ADP1A36 | adenosine diphosphate  
ADP1A37 | adenosine diphosphate  
ADP1A38 | adenosine diphosphate  
ADP1A39 | adenosine diphosphate  
ADP1A40 | adenosine diphosphate  
ADP1A41 | adenosine diphosphate  
ADP1A42 | adenosine diphosphate  
ADP1A43 | adenosine diphosphate  
ADP1A44 | adenosine diphosphate  
ADP1A45 | adenosine diphosphate  
ADP1A46 | adenosine diphosphate  
ADP1A47 | adenosine diphosphate  
ADP1A48 | adenosine diphosphate  
ADP1A49 | adenosine diphosphate  
ADP1A50 | adenosine diphosphate  
ADP1A51 | adenosine diphosphate  
ADP1A52 | adenosine diphosphate  
ADP1A53 | adenosine diphosphate  
ADP1A54 | adenosine diphosphate  
ADP1A55 | adenosine diphosphate  
ADP1A56 | adenosine diphosphate  
ADP1A57 | adenosine diphosphate  
ADP1A58 | adenosine diphosphate  
ADP1A59 | adenosine diphosphate  
ADP1A60 | adenosine diphosphate  
ADP1A61 | adenosine diphosphate  
ADP1A62 | adenosine diphosphate  
ADP1A63 | adenosine diphosphate  
ADP1A64 | adenosine diphosphate  
ADP1A65 | adenosine diphosphate  
ADP1A66 | adenosine diphosphate  
ADP1A67 | adenosine diphosphate  
ADP1A68 | adenosine diphosphate  
ADP1A69 | adenosine diphosphate  
ADP1A70 | adenosine diphosphate  
ADP1A71 | adenosine diphosphate  
ADP1A72 | adenosine diphosphate  
ADP1A73 | adenosine diphosphate  
ADP1A74 | adenosine diphosphate  
ADP1A75 | adenosine diphosphate  
ADP1A76 | adenosine diphosphate  
ADP1A77 | adenosine diphosphate  
ADP1A78 | adenosine diphosphate  
ADP1A79 | adenosine diphosphate  
ADP1A80 | adenosine diphosphate  
ADP1A81 | adenosine diphosphate  
ADP1A82 | adenosine diphosphate  
ADP1A83 | adenosine diphosphate  
ADP1A84 | adenosine diphosphate  
ADP1A85 | adenosine diphosphate  
ADP1A86 | adenosine diphosphate  
ADP1A87 | adenosine diphosphate  
ADP1A88 | adenosine diphosphate  
ADP1A89 | adenosine diphosphate  
ADP1A90 | adenosine diphosphate  
ADP1A91 | adenosine diphosphate  
ADP1A92 | adenosine diphosphate  
ADP1A93 | adenosine diphosphate  
ADP1A94 | adenosine diphosphate  
ADP1A95 | adenosine diphosphate  
ADP1A96 | adenosine diphosphate  
ADP1A97 | adenosine diphosphate  
ADP1A98 | adenosine diphosphate  
ADP1A99 | adenosine diphosphate  
ADP1A100 | adenosine diphosphate

Immune system

# Antigen processing and presentation

## hsa04612

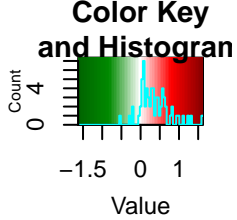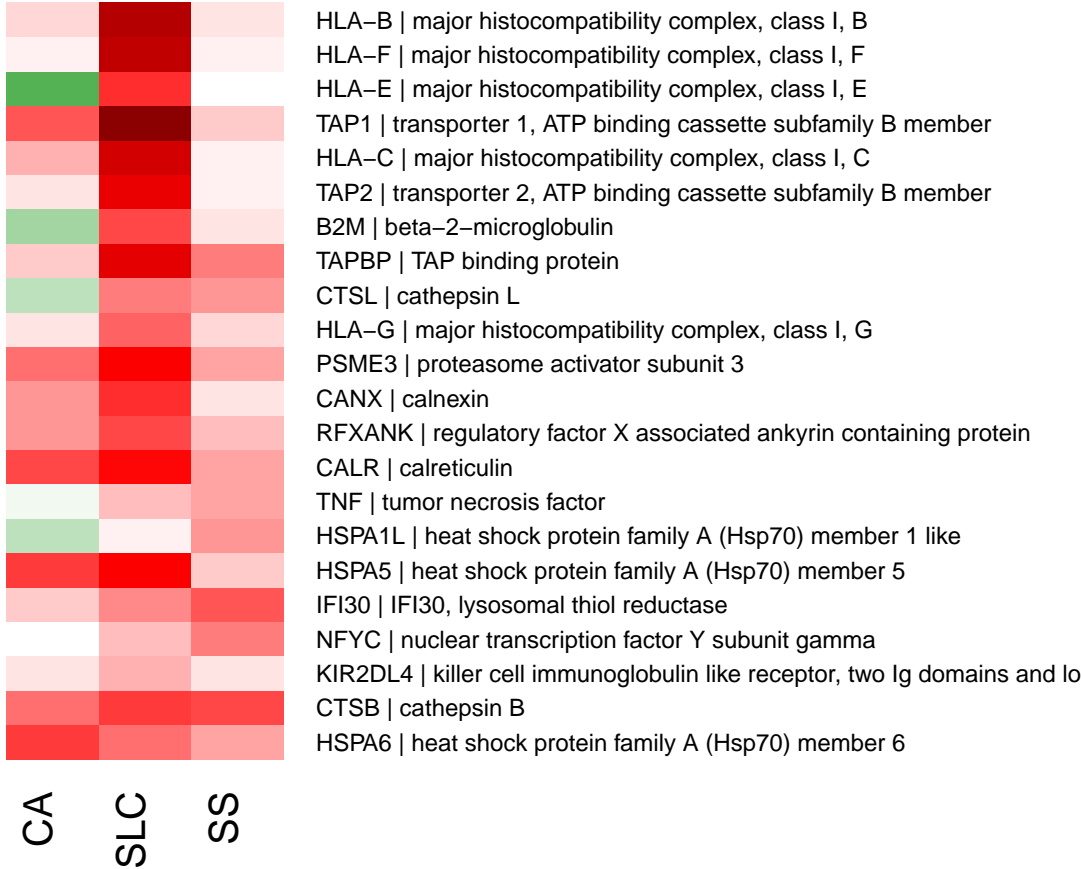

Immune system

# Toll-like receptor signaling pathway

## hsa04620

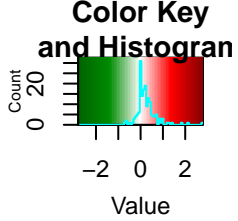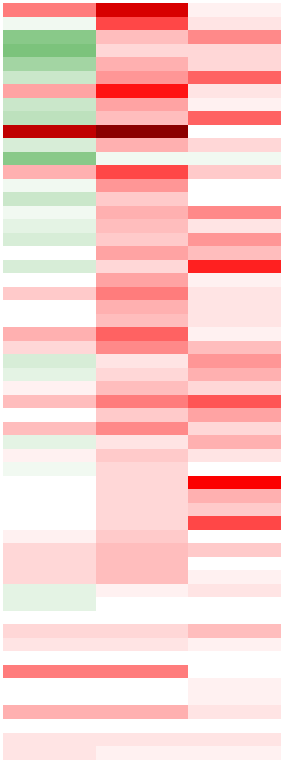

CA

SLC

SS

- CXCL9 | C-X-C motif chemokine ligand 9
- NF-κB1 | nuclear factor kappa B
- NF-κB1 | NF-κB inhibitor alpha
- MAP3K8 | mitogen-activated protein kinase kinase kinase 8
- MAP3K3 | mitogen-activated protein kinase 3
- LY96 | lymphocyte antigen 96
- STAT1 | signal transducer and activator of transcription 1
- PIK3CD | phosphatidylinositol-4,5-bisphosphate 3-kinase catalytic subunit delta
- SPP1 | secreted phosphoprotein 1
- NFκB1 | nuclear factor kappa B subunit 1
- TLR3 | toll like receptor 3
- IRF7 | interferon regulatory factor 7
- MAPK11 | mitogen-activated protein kinase 11
- PIK3CB | phosphatidylinositol-4,5-bisphosphate 3-kinase catalytic subunit beta
- PIK3R5 | phosphoinositide-3-kinase regulatory subunit 5
- IL1B | interleukin 1 beta
- FNAR2 | interferon alpha and beta receptor subunit 2
- MAP2K6 | mitogen-activated protein kinase kinase 6
- CICAP1 | toll like receptor adaptor molecule 1
- CASP8 | caspase 8
- RELA | RELA proto-oncogene, NF-κB subunit
- CBLIK1 | conserved helix-loop-helix ubiquitous kinase
- IRF3 | interferon regulatory factor 3
- RAC1 | Rac family small GTPase 1
- TLR1 | toll like receptor 1
- PIK3CG | phosphatidylinositol-4,5-bisphosphate 3-kinase catalytic subunit gamma
- IKKγ | inhibitor of nuclear factor kappa B kinase subunit gamma
- TLR2 | toll like receptor 2
- MAPK1 | mitogen-activated protein kinase 1
- FADD | Fas associated via death domain
- FNAR1 | interferon alpha and beta receptor subunit 1
- CD80 | CD80 molecule
- MAP3CA | phosphatidylinositol-4,5-bisphosphate 3-kinase catalytic subunit alpha
- MAPK14 | mitogen-activated protein kinase 14
- TLR6 | toll like receptor 6
- TNF | tumor necrosis factor
- TLR8 | toll like receptor 8
- MAP2K2 | mitogen-activated protein kinase kinase 2
- MAPK12 | mitogen-activated protein kinase 12
- TAK1 | TAK1 binding kinase 1
- TIRAP | TIR domain-containing adaptor protein
- IL12A | interleukin 12A
- IL12B | interleukin 12B
- MYD88 | myeloid differentiation primary response 88
- IRAK4 | interleukin 1 receptor associated kinase 4
- TLR9 | toll like receptor 9
- IKKε | inhibitor of nuclear factor kappa B kinase subunit epsilon
- IFNA5 | interferon alpha 5
- IFNA21 | interferon alpha 21
- MAPK13 | mitogen-activated protein kinase 13
- IFNB1 | interferon beta
- CD14 | CD14 molecule
- PIK3R2 | phosphoinositide-3-kinase regulatory subunit 2

Immune system

# RIG-I-like receptor signaling pathway

## hsa04622

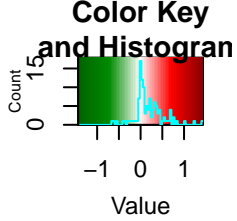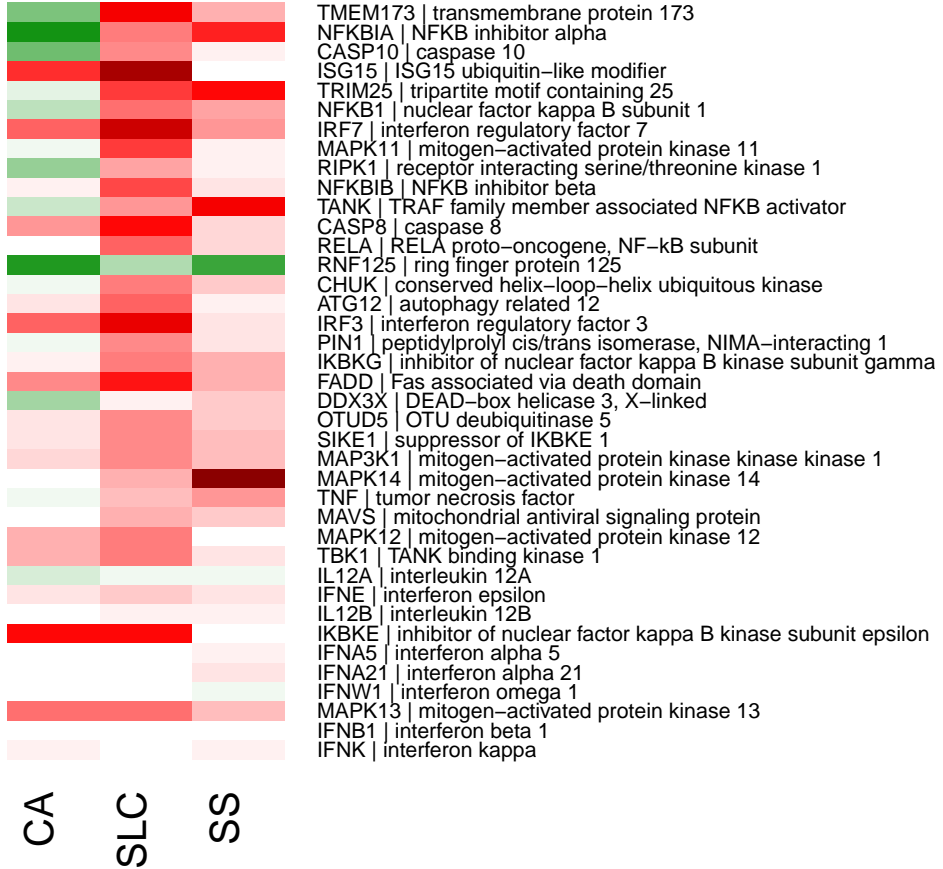

Immune system

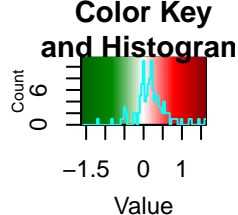

# Fc epsilon RI signaling pathway

## hsa04664

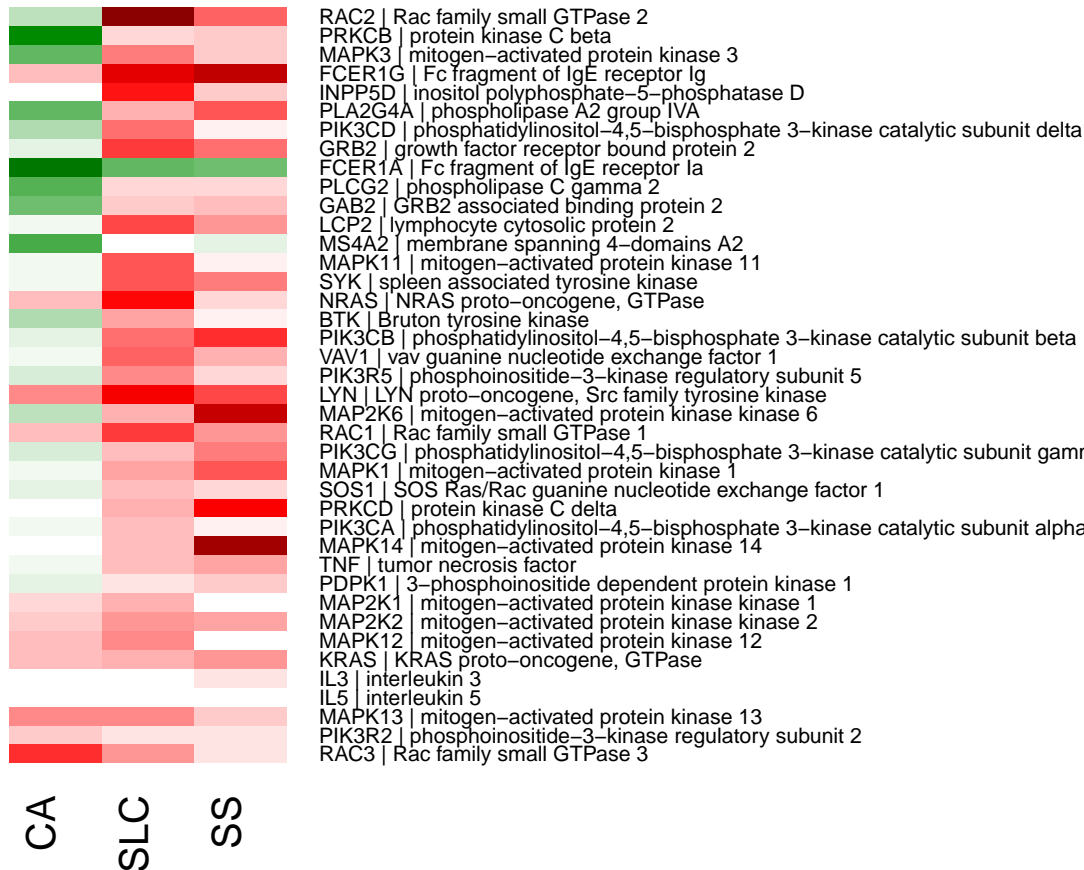

Immune system

# Fc gamma R-mediated phagocytosis hsa04666

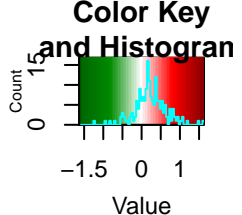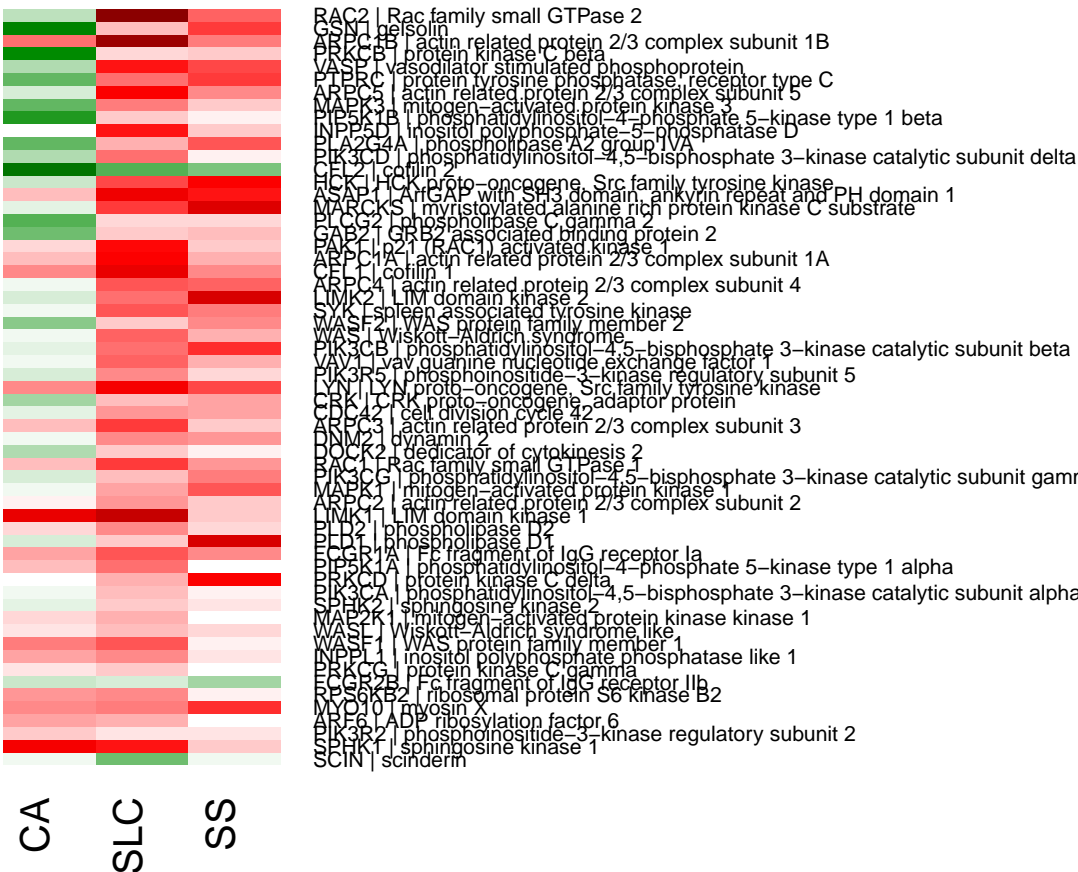

Immune system

# Bacterial invasion of epithelial cells

## hsa05100

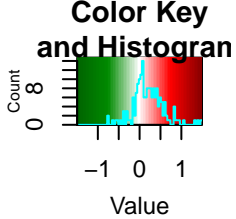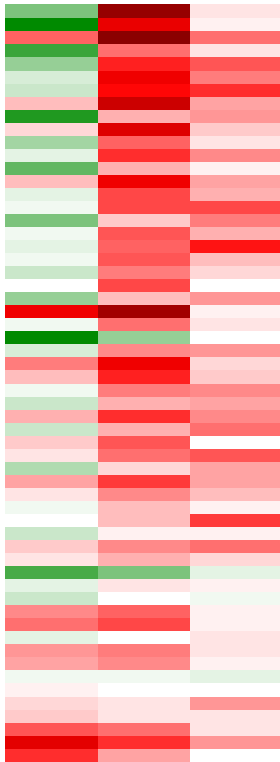

CA

SLC

SS

ITGA5 | integrin subunit alpha 5  
 PAV1 | pavelin  
 ARPC1B | actin related protein 2/3 complex subunit 1B  
 VCL | vinculin  
 PXN | paxillin  
 ARPC5 | actin related protein 2/3 complex subunit 5  
 SHC1 | SHC adaptor protein 1  
 LK1 | integrin linked kinase  
 EN1 | fibronectin 1  
 PIK3CD | phosphatidylinositol-4,5-bisphosphate 3-kinase catalytic subunit delta  
 CENPB | catenin beta 1  
 DOCK1 | mediator of cytokinesis 1  
 ARPC1A | actin related protein 2/3 complex subunit 1A  
 ACTB | actin beta  
 ARPC4 | actin related protein 2/3 complex subunit 4  
 WASF2 | WAS protein family member 2  
 WASL | Wiskott-Aldrich syndrome  
 PIK3CB | phosphatidylinositol-4,5-bisphosphate 3-kinase catalytic subunit beta  
 LIC3B | hematopoietic cell-specific Lyn substrate 1  
 PIK3B5 | phosphoinositide-3-kinase regulatory subunit 5  
 BCAR1 | BCAR1, Cas family scaffolding protein  
 CEK1 | CEK proto-oncogene, adaptor protein  
 MEK1 | MEK1 proto-oncogene, receptor tyrosine kinase  
 SEPT2 | septin 2  
 GAB1 | GRB2 associated binding protein 1  
 CDC42 | cell division cycle 42  
 SRC | SRC proto-oncogene, non-receptor tyrosine kinase  
 ARPC3 | actin related protein 2/3 complex subunit 3  
 DNMC3 | dynamin 2  
 HOA1 | ras homolog family member A  
 BACT1 | Rac family small GTPase 1  
 PIK3CG | phosphatidylinositol-4,5-bisphosphate 3-kinase catalytic subunit gamma  
 CNM1 | dynamin 1  
 CLIP1 | clathrin light chain B  
 CLTB | clathrin light chain B  
 CLTC | clathrin heavy chain  
 ARPC2 | actin related protein 2/3 complex subunit 2  
 PIK3CA | phosphatidylinositol-4,5-bisphosphate 3-kinase catalytic subunit alpha  
 SHCN1 | catenin alpha  
 SHC3 | SHC adaptor protein 3  
 LMO2 | engulfment and cell motility 2  
 WASL | Wiskott-Aldrich syndrome like  
 ARHGAP10 | Rho GTPase activating protein 10  
 DNMC3 | SHC adaptor protein 2  
 CNM3 | dynamin 3  
 CLTA | clathrin light chain A  
 WASF1 | WAS protein family member 1  
 SHC4 | SHC adaptor protein 4  
 ALPG3 | actin gamma 1  
 CEV3 | septin 3  
 SEPT12 | septin 12  
 CLTCL1 | clathrin heavy chain like 1  
 PIK3R2 | phosphoinositide-3-kinase regulatory subunit 2  
 LMO3 | engulfment and cell motility 3  
 MAO3 | mitotic arrest deficient 2 like 2  
 SEPT3 | septin 3

Infectious disease

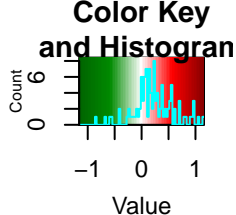

# Vibrio cholerae infection hsa05110

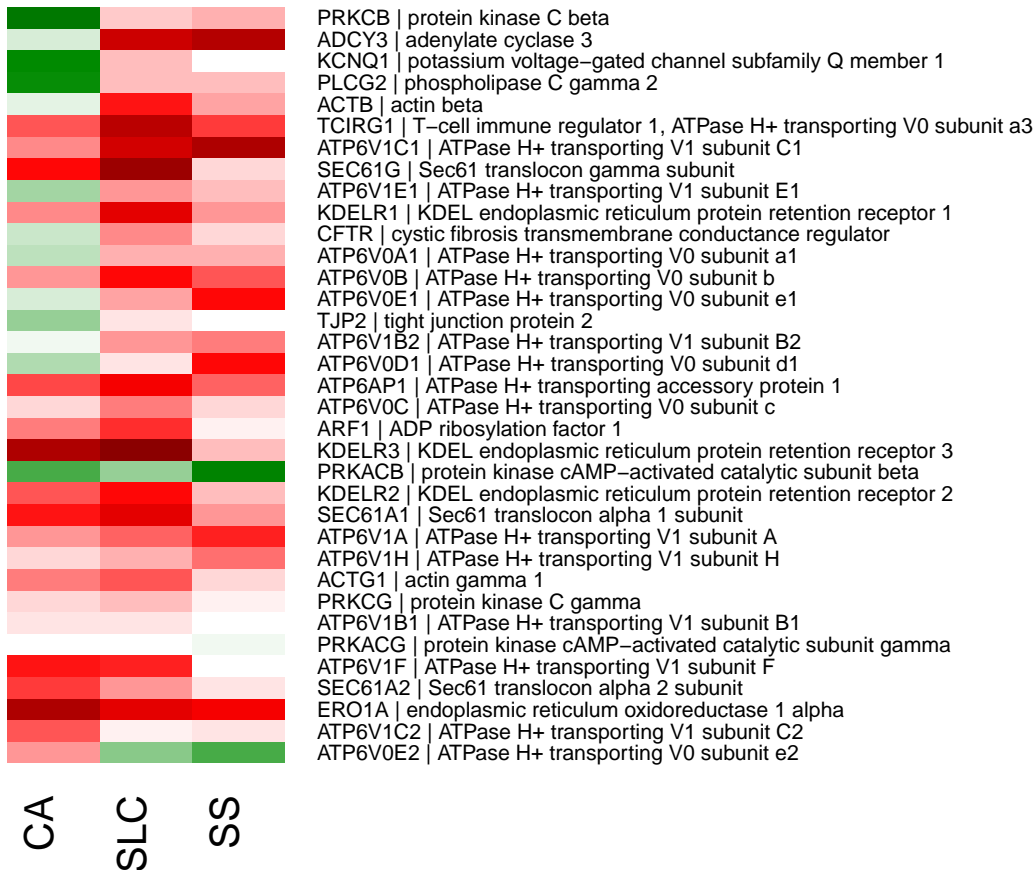

Infectious disease



# Color Key and Histogram

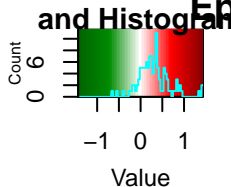

# Epithelial cell signaling in *Helicobacter pylori* infection

## hsa05120

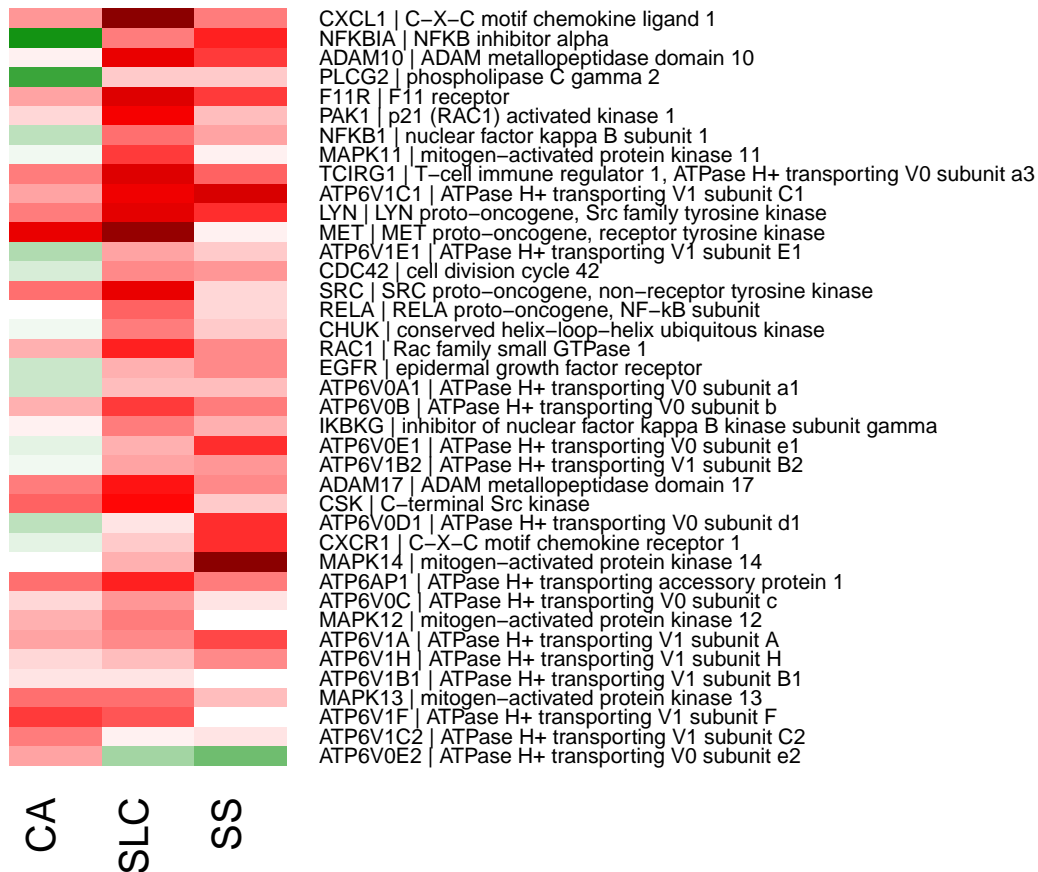

Infectious disease

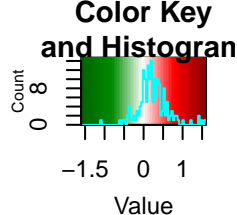

# Salmonella infection hsa05132

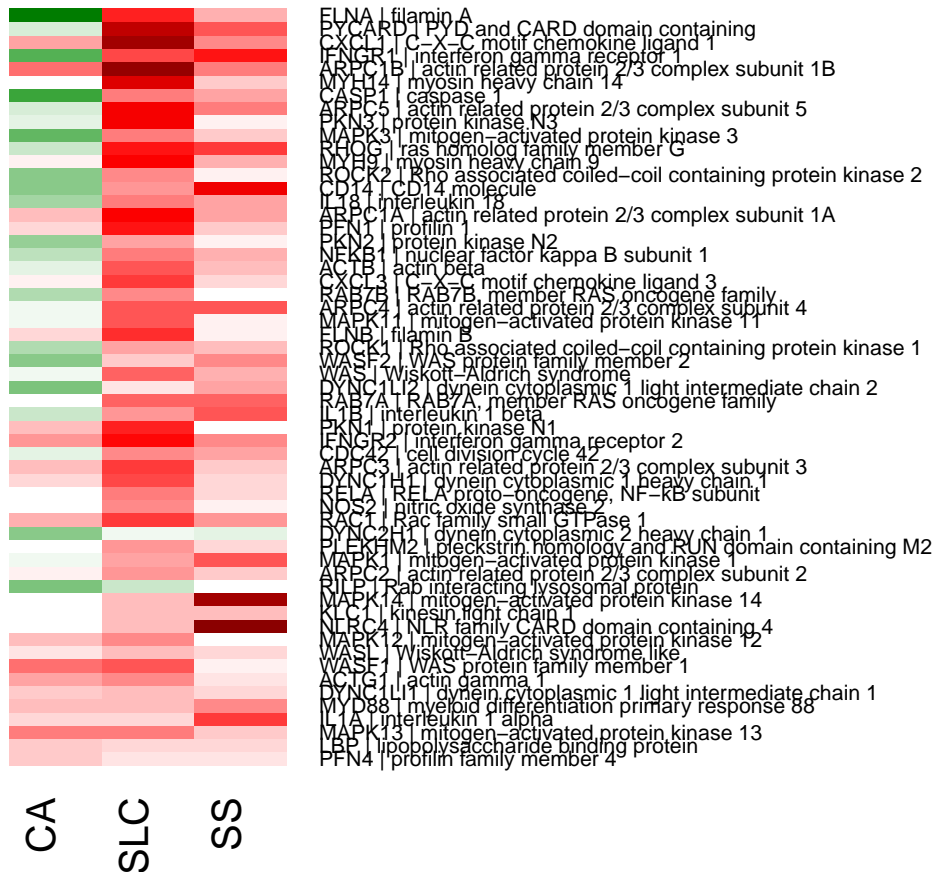

Infectious disease

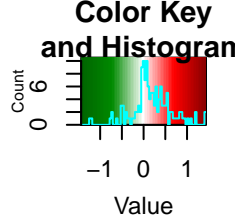

## Pertussis hsa05133

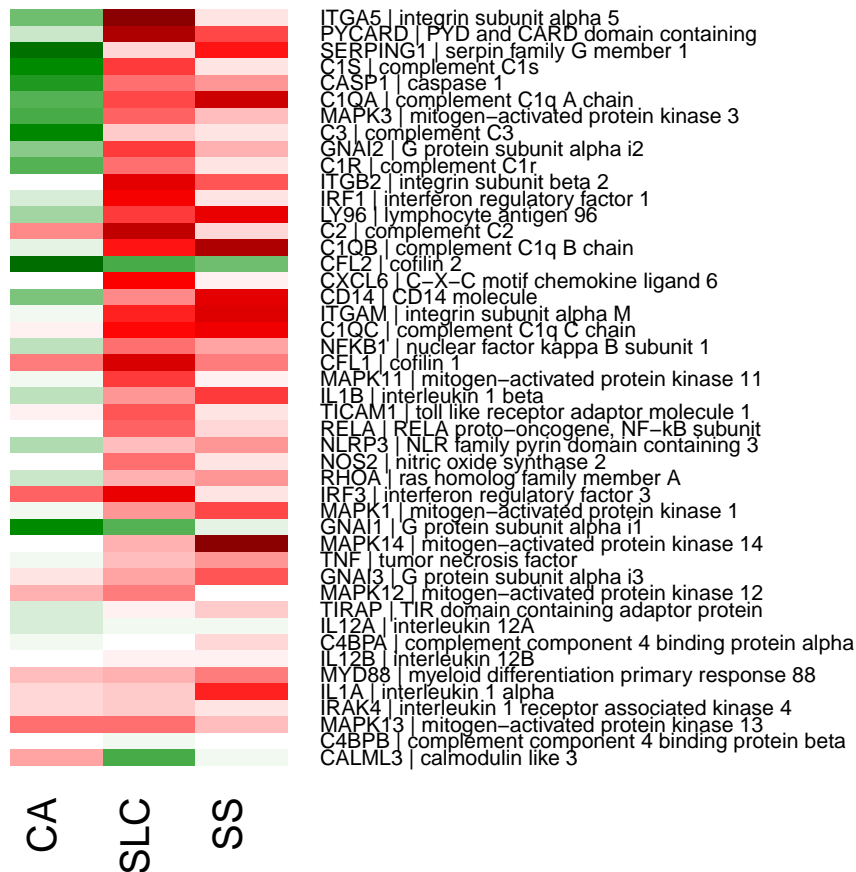

Infectious disease

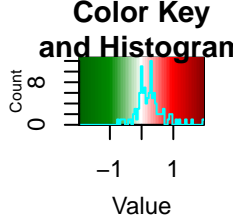

# Legionellosis hsa05134

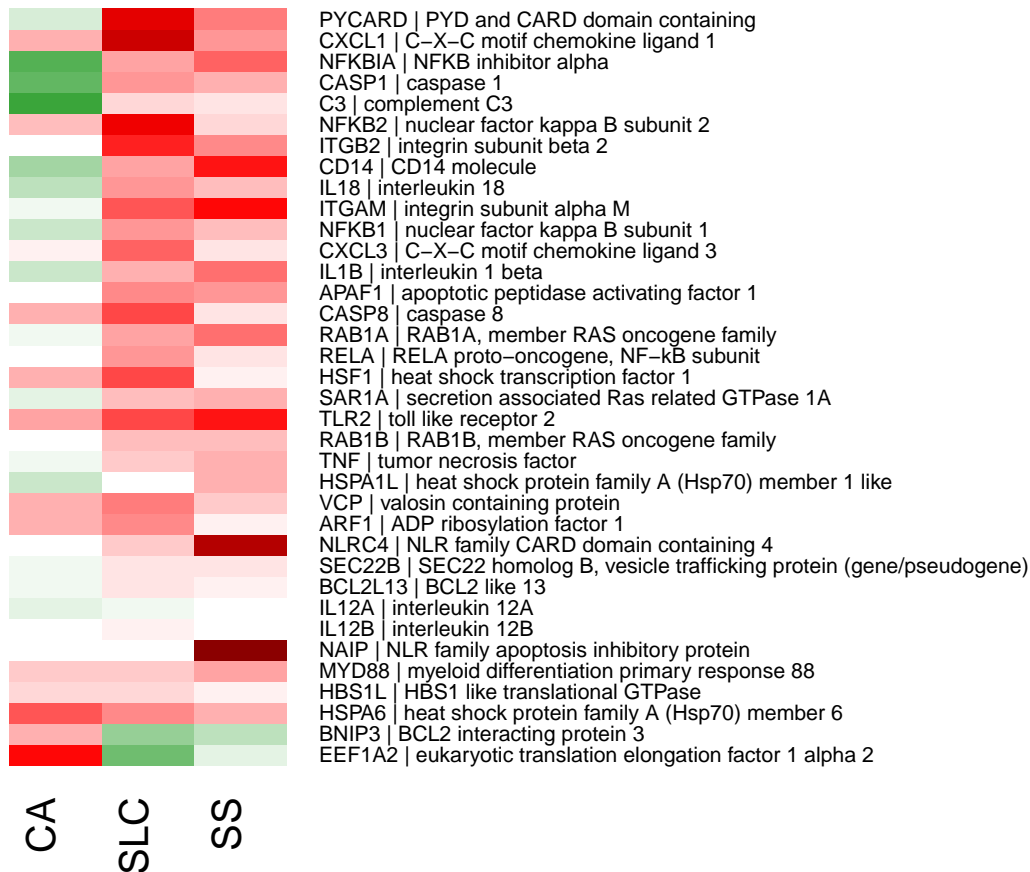

Infectious disease

# Chagas disease (American trypanosomiasis)

## hsa05142

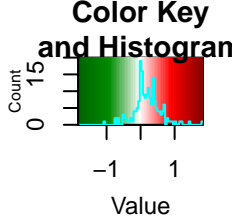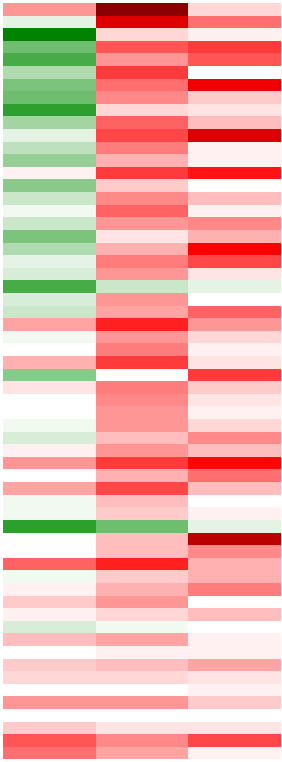

CA  
SLC  
SS

- SERPINE1 | serpin family E member 1
- IGFBP3 | transforming growth factor beta receptor 2
- IFNGR1 | interferon gamma receptor 1
- NFKBIA | NF-kB inhibitor alpha
- ACE1 | angiotensin I converting enzyme
- MAPK3 | mitogen-activated protein kinase 3
- C3 | complement C3
- GNAI2 | G protein subunit alpha i2
- CD35 | complement C3b receptor
- IGFBP2 | transforming growth factor beta 2
- CTOC1 | complement C3d, C chain
- GNAI1 | G protein subunit alpha i1
- MAPK11 | nuclear factor kappa B subunit 11
- INERSE1A | TNF receptor subfamily member 1A
- FAS | Fas cell surface death receptor
- CASP8 | CASP8 and FADD like apoptosis regulator
- ULK3 | phosphatidylinositol-3-kinase catalytic subunit beta
- PPP2CB | protein phosphatase 2 catalytic subunit beta
- IGFBP1 | transforming growth factor beta 3
- IL12B | interleukin 12 beta
- PLCB2 | phospholipase beta
- TICAM1 | toll like receptor adaptor molecule 1
- CASP8 | caspase 8
- GNAI3 | G protein subunit alpha i3
- IGFBP1 | transforming growth factor beta receptor 1
- REL A | REL A proto-oncogene, NF-kB subunit
- NOS2 | nitric oxide synthase 2
- ULK1 | conserved helix-loop-helix ubiquitous kinase
- ULK3 | phosphatidylinositol-3-kinase catalytic subunit gamma
- IKKGB | inhibitor of nuclear factor kappa B kinase subunit gamma
- TLR2 | toll like receptor
- MAPK1 | mitogen-activated protein kinase 1
- FADD | Fas associated via death
- ULK3 | phosphatidylinositol-3-kinase catalytic subunit alpha
- GNAI1 | G protein subunit alpha i1
- MAPK14 | mitogen-activated protein kinase 14
- CAR1 | calreticulin
- INF1 | interferon inducible factor
- GNAI3 | G protein subunit alpha i3
- MAPK12 | mitogen-activated protein kinase 12
- PPP2R2A | protein phosphatase 2 regulatory subunit Balpha
- PLCB4 | phospholipase C beta 4
- IL12B | interleukin 12 beta
- MYD88 | myeloid differentiation primary response, 88
- IKKAP1 | interleukin 1 receptor associated kinase 4
- MAPK13 | mitogen-activated protein kinase 13
- IFNG | interferon gamma
- ULK2 | phosphatidylinositol-3-kinase regulatory subunit 2
- GNAI2 | G protein subunit alpha i2
- PPP2R2C | protein phosphatase 2 regulatory subunit Bgamma

Infectious disease

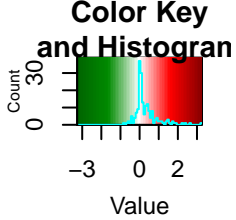

# Amoebiasis hsa05146

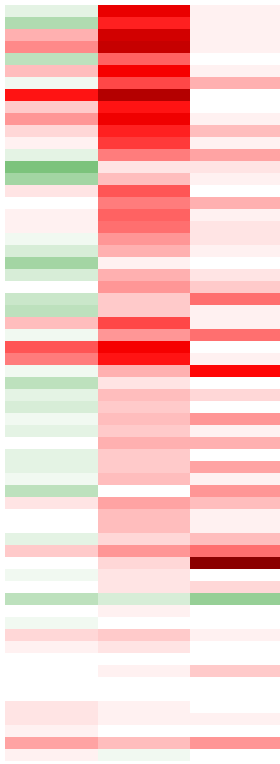

|          |                                                |
|----------|------------------------------------------------|
| COL4A2   | collagen type IV alpha 2 chain                 |
| LAMC1    | laminin subunit gamma 1                        |
| COL4A1   | collagen type IV alpha 1 chain                 |
| LAMC2    | laminin subunit gamma 2                        |
| COL4A2   | collagen type IV alpha 2 chain                 |
| GFBR4    | transforming growth factor beta 1              |
| COL1A1   | collagen type I alpha 1 chain                  |
| AVB3     | laminin subunit beta 3                         |
| COL1A1   | collagen type I alpha 1 chain                  |
| CCDC1    | C-C motif chemokine ligand 1                   |
| LAMC1    | laminin subunit gamma 1                        |
| ACTA1    | actinin alpha 1                                |
| VCKCB    | vinculin protein kinase C beta                 |
| LAMB1    | laminin subunit beta 1                         |
| IGFBP1   | insulin-like growth factor binding protein 1   |
| IGFBP2   | insulin-like growth factor binding protein 2   |
| IGFBP3   | insulin-like growth factor binding protein 3   |
| IGFBP4   | insulin-like growth factor binding protein 4   |
| IGFBP5   | insulin-like growth factor binding protein 5   |
| IGFBP6   | insulin-like growth factor binding protein 6   |
| IGFBP7   | insulin-like growth factor binding protein 7   |
| IGFBP8   | insulin-like growth factor binding protein 8   |
| IGFBP9   | insulin-like growth factor binding protein 9   |
| IGFBP10  | insulin-like growth factor binding protein 10  |
| IGFBP11  | insulin-like growth factor binding protein 11  |
| IGFBP12  | insulin-like growth factor binding protein 12  |
| IGFBP13  | insulin-like growth factor binding protein 13  |
| IGFBP14  | insulin-like growth factor binding protein 14  |
| IGFBP15  | insulin-like growth factor binding protein 15  |
| IGFBP16  | insulin-like growth factor binding protein 16  |
| IGFBP17  | insulin-like growth factor binding protein 17  |
| IGFBP18  | insulin-like growth factor binding protein 18  |
| IGFBP19  | insulin-like growth factor binding protein 19  |
| IGFBP20  | insulin-like growth factor binding protein 20  |
| IGFBP21  | insulin-like growth factor binding protein 21  |
| IGFBP22  | insulin-like growth factor binding protein 22  |
| IGFBP23  | insulin-like growth factor binding protein 23  |
| IGFBP24  | insulin-like growth factor binding protein 24  |
| IGFBP25  | insulin-like growth factor binding protein 25  |
| IGFBP26  | insulin-like growth factor binding protein 26  |
| IGFBP27  | insulin-like growth factor binding protein 27  |
| IGFBP28  | insulin-like growth factor binding protein 28  |
| IGFBP29  | insulin-like growth factor binding protein 29  |
| IGFBP30  | insulin-like growth factor binding protein 30  |
| IGFBP31  | insulin-like growth factor binding protein 31  |
| IGFBP32  | insulin-like growth factor binding protein 32  |
| IGFBP33  | insulin-like growth factor binding protein 33  |
| IGFBP34  | insulin-like growth factor binding protein 34  |
| IGFBP35  | insulin-like growth factor binding protein 35  |
| IGFBP36  | insulin-like growth factor binding protein 36  |
| IGFBP37  | insulin-like growth factor binding protein 37  |
| IGFBP38  | insulin-like growth factor binding protein 38  |
| IGFBP39  | insulin-like growth factor binding protein 39  |
| IGFBP40  | insulin-like growth factor binding protein 40  |
| IGFBP41  | insulin-like growth factor binding protein 41  |
| IGFBP42  | insulin-like growth factor binding protein 42  |
| IGFBP43  | insulin-like growth factor binding protein 43  |
| IGFBP44  | insulin-like growth factor binding protein 44  |
| IGFBP45  | insulin-like growth factor binding protein 45  |
| IGFBP46  | insulin-like growth factor binding protein 46  |
| IGFBP47  | insulin-like growth factor binding protein 47  |
| IGFBP48  | insulin-like growth factor binding protein 48  |
| IGFBP49  | insulin-like growth factor binding protein 49  |
| IGFBP50  | insulin-like growth factor binding protein 50  |
| IGFBP51  | insulin-like growth factor binding protein 51  |
| IGFBP52  | insulin-like growth factor binding protein 52  |
| IGFBP53  | insulin-like growth factor binding protein 53  |
| IGFBP54  | insulin-like growth factor binding protein 54  |
| IGFBP55  | insulin-like growth factor binding protein 55  |
| IGFBP56  | insulin-like growth factor binding protein 56  |
| IGFBP57  | insulin-like growth factor binding protein 57  |
| IGFBP58  | insulin-like growth factor binding protein 58  |
| IGFBP59  | insulin-like growth factor binding protein 59  |
| IGFBP60  | insulin-like growth factor binding protein 60  |
| IGFBP61  | insulin-like growth factor binding protein 61  |
| IGFBP62  | insulin-like growth factor binding protein 62  |
| IGFBP63  | insulin-like growth factor binding protein 63  |
| IGFBP64  | insulin-like growth factor binding protein 64  |
| IGFBP65  | insulin-like growth factor binding protein 65  |
| IGFBP66  | insulin-like growth factor binding protein 66  |
| IGFBP67  | insulin-like growth factor binding protein 67  |
| IGFBP68  | insulin-like growth factor binding protein 68  |
| IGFBP69  | insulin-like growth factor binding protein 69  |
| IGFBP70  | insulin-like growth factor binding protein 70  |
| IGFBP71  | insulin-like growth factor binding protein 71  |
| IGFBP72  | insulin-like growth factor binding protein 72  |
| IGFBP73  | insulin-like growth factor binding protein 73  |
| IGFBP74  | insulin-like growth factor binding protein 74  |
| IGFBP75  | insulin-like growth factor binding protein 75  |
| IGFBP76  | insulin-like growth factor binding protein 76  |
| IGFBP77  | insulin-like growth factor binding protein 77  |
| IGFBP78  | insulin-like growth factor binding protein 78  |
| IGFBP79  | insulin-like growth factor binding protein 79  |
| IGFBP80  | insulin-like growth factor binding protein 80  |
| IGFBP81  | insulin-like growth factor binding protein 81  |
| IGFBP82  | insulin-like growth factor binding protein 82  |
| IGFBP83  | insulin-like growth factor binding protein 83  |
| IGFBP84  | insulin-like growth factor binding protein 84  |
| IGFBP85  | insulin-like growth factor binding protein 85  |
| IGFBP86  | insulin-like growth factor binding protein 86  |
| IGFBP87  | insulin-like growth factor binding protein 87  |
| IGFBP88  | insulin-like growth factor binding protein 88  |
| IGFBP89  | insulin-like growth factor binding protein 89  |
| IGFBP90  | insulin-like growth factor binding protein 90  |
| IGFBP91  | insulin-like growth factor binding protein 91  |
| IGFBP92  | insulin-like growth factor binding protein 92  |
| IGFBP93  | insulin-like growth factor binding protein 93  |
| IGFBP94  | insulin-like growth factor binding protein 94  |
| IGFBP95  | insulin-like growth factor binding protein 95  |
| IGFBP96  | insulin-like growth factor binding protein 96  |
| IGFBP97  | insulin-like growth factor binding protein 97  |
| IGFBP98  | insulin-like growth factor binding protein 98  |
| IGFBP99  | insulin-like growth factor binding protein 99  |
| IGFBP100 | insulin-like growth factor binding protein 100 |

Infectious disease



# Color Key

## and Histogram

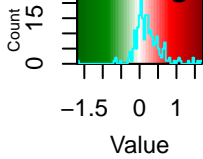

# Hepatitis C hsa05160

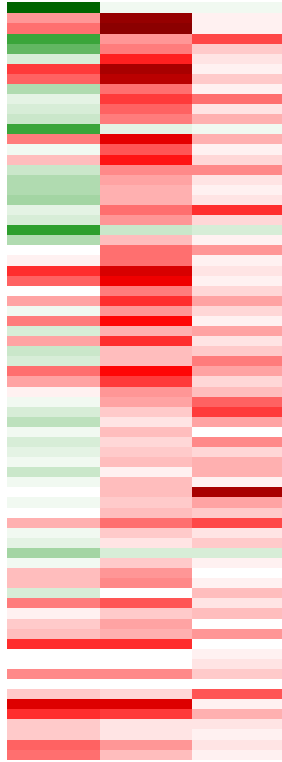

- CLDN5 | claudin 5
- CLDN9 | claudin 9
- MMP9 | matrix metalloproteinase 9
- MMP13 | matrix metalloproteinase 13
- OSY1 | osteonectin
- OSY2 | osteonectin
- OSY3 | osteonectin
- OSY4 | osteonectin
- OSY5 | osteonectin
- OSY6 | osteonectin
- OSY7 | osteonectin
- OSY8 | osteonectin
- OSY9 | osteonectin
- OSY10 | osteonectin
- OSY11 | osteonectin
- OSY12 | osteonectin
- OSY13 | osteonectin
- OSY14 | osteonectin
- OSY15 | osteonectin
- OSY16 | osteonectin
- OSY17 | osteonectin
- OSY18 | osteonectin
- OSY19 | osteonectin
- OSY20 | osteonectin
- OSY21 | osteonectin
- OSY22 | osteonectin
- OSY23 | osteonectin
- OSY24 | osteonectin
- OSY25 | osteonectin
- OSY26 | osteonectin
- OSY27 | osteonectin
- OSY28 | osteonectin
- OSY29 | osteonectin
- OSY30 | osteonectin
- OSY31 | osteonectin
- OSY32 | osteonectin
- OSY33 | osteonectin
- OSY34 | osteonectin
- OSY35 | osteonectin
- OSY36 | osteonectin
- OSY37 | osteonectin
- OSY38 | osteonectin
- OSY39 | osteonectin
- OSY40 | osteonectin
- OSY41 | osteonectin
- OSY42 | osteonectin
- OSY43 | osteonectin
- OSY44 | osteonectin
- OSY45 | osteonectin
- OSY46 | osteonectin
- OSY47 | osteonectin
- OSY48 | osteonectin
- OSY49 | osteonectin
- OSY50 | osteonectin
- OSY51 | osteonectin
- OSY52 | osteonectin
- OSY53 | osteonectin
- OSY54 | osteonectin
- OSY55 | osteonectin
- OSY56 | osteonectin
- OSY57 | osteonectin
- OSY58 | osteonectin
- OSY59 | osteonectin
- OSY60 | osteonectin
- OSY61 | osteonectin
- OSY62 | osteonectin
- OSY63 | osteonectin
- OSY64 | osteonectin
- OSY65 | osteonectin
- OSY66 | osteonectin
- OSY67 | osteonectin
- OSY68 | osteonectin
- OSY69 | osteonectin
- OSY70 | osteonectin
- OSY71 | osteonectin
- OSY72 | osteonectin
- OSY73 | osteonectin
- OSY74 | osteonectin
- OSY75 | osteonectin
- OSY76 | osteonectin
- OSY77 | osteonectin
- OSY78 | osteonectin
- OSY79 | osteonectin
- OSY80 | osteonectin
- OSY81 | osteonectin
- OSY82 | osteonectin
- OSY83 | osteonectin
- OSY84 | osteonectin
- OSY85 | osteonectin
- OSY86 | osteonectin
- OSY87 | osteonectin
- OSY88 | osteonectin
- OSY89 | osteonectin
- OSY90 | osteonectin
- OSY91 | osteonectin
- OSY92 | osteonectin
- OSY93 | osteonectin
- OSY94 | osteonectin
- OSY95 | osteonectin
- OSY96 | osteonectin
- OSY97 | osteonectin
- OSY98 | osteonectin
- OSY99 | osteonectin
- OSY100 | osteonectin

CA  
SLC  
SS

Infectious disease



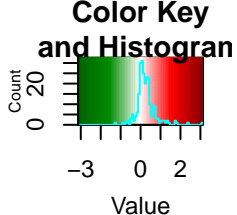

# Hepatitis B hsa05161

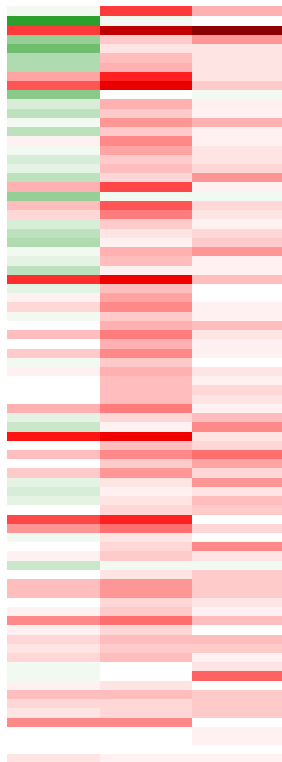

CA

SLC

SS

|          |                                                     |
|----------|-----------------------------------------------------|
| TGFB1    | transforming growth factor beta 1                   |
| MAP3B    | matrix metalloproteinase 9                          |
| KIF14    | protein kinase 4 beta                               |
| MAP3A1   | protein kinase 3                                    |
| MAP3K1   | signal transducer and activator of transcription 5A |
| MAP3K2   | signal transducer and activator of transcription 1  |
| MAP3K3   | transforming growth factor alpha                    |
| MAP3K4   | transforming growth factor beta 1                   |
| MAP3K5   | transforming growth factor beta 2                   |
| MAP3K6   | transforming growth factor beta 3                   |
| MAP3K7   | transforming growth factor beta 4                   |
| MAP3K8   | transforming growth factor beta 5                   |
| MAP3K9   | transforming growth factor beta 6                   |
| MAP3K10  | transforming growth factor beta 7                   |
| MAP3K11  | transforming growth factor beta 8                   |
| MAP3K12  | transforming growth factor beta 9                   |
| MAP3K13  | transforming growth factor beta 10                  |
| MAP3K14  | transforming growth factor beta 11                  |
| MAP3K15  | transforming growth factor beta 12                  |
| MAP3K16  | transforming growth factor beta 13                  |
| MAP3K17  | transforming growth factor beta 14                  |
| MAP3K18  | transforming growth factor beta 15                  |
| MAP3K19  | transforming growth factor beta 16                  |
| MAP3K20  | transforming growth factor beta 17                  |
| MAP3K21  | transforming growth factor beta 18                  |
| MAP3K22  | transforming growth factor beta 19                  |
| MAP3K23  | transforming growth factor beta 20                  |
| MAP3K24  | transforming growth factor beta 21                  |
| MAP3K25  | transforming growth factor beta 22                  |
| MAP3K26  | transforming growth factor beta 23                  |
| MAP3K27  | transforming growth factor beta 24                  |
| MAP3K28  | transforming growth factor beta 25                  |
| MAP3K29  | transforming growth factor beta 26                  |
| MAP3K30  | transforming growth factor beta 27                  |
| MAP3K31  | transforming growth factor beta 28                  |
| MAP3K32  | transforming growth factor beta 29                  |
| MAP3K33  | transforming growth factor beta 30                  |
| MAP3K34  | transforming growth factor beta 31                  |
| MAP3K35  | transforming growth factor beta 32                  |
| MAP3K36  | transforming growth factor beta 33                  |
| MAP3K37  | transforming growth factor beta 34                  |
| MAP3K38  | transforming growth factor beta 35                  |
| MAP3K39  | transforming growth factor beta 36                  |
| MAP3K40  | transforming growth factor beta 37                  |
| MAP3K41  | transforming growth factor beta 38                  |
| MAP3K42  | transforming growth factor beta 39                  |
| MAP3K43  | transforming growth factor beta 40                  |
| MAP3K44  | transforming growth factor beta 41                  |
| MAP3K45  | transforming growth factor beta 42                  |
| MAP3K46  | transforming growth factor beta 43                  |
| MAP3K47  | transforming growth factor beta 44                  |
| MAP3K48  | transforming growth factor beta 45                  |
| MAP3K49  | transforming growth factor beta 46                  |
| MAP3K50  | transforming growth factor beta 47                  |
| MAP3K51  | transforming growth factor beta 48                  |
| MAP3K52  | transforming growth factor beta 49                  |
| MAP3K53  | transforming growth factor beta 50                  |
| MAP3K54  | transforming growth factor beta 51                  |
| MAP3K55  | transforming growth factor beta 52                  |
| MAP3K56  | transforming growth factor beta 53                  |
| MAP3K57  | transforming growth factor beta 54                  |
| MAP3K58  | transforming growth factor beta 55                  |
| MAP3K59  | transforming growth factor beta 56                  |
| MAP3K60  | transforming growth factor beta 57                  |
| MAP3K61  | transforming growth factor beta 58                  |
| MAP3K62  | transforming growth factor beta 59                  |
| MAP3K63  | transforming growth factor beta 60                  |
| MAP3K64  | transforming growth factor beta 61                  |
| MAP3K65  | transforming growth factor beta 62                  |
| MAP3K66  | transforming growth factor beta 63                  |
| MAP3K67  | transforming growth factor beta 64                  |
| MAP3K68  | transforming growth factor beta 65                  |
| MAP3K69  | transforming growth factor beta 66                  |
| MAP3K70  | transforming growth factor beta 67                  |
| MAP3K71  | transforming growth factor beta 68                  |
| MAP3K72  | transforming growth factor beta 69                  |
| MAP3K73  | transforming growth factor beta 70                  |
| MAP3K74  | transforming growth factor beta 71                  |
| MAP3K75  | transforming growth factor beta 72                  |
| MAP3K76  | transforming growth factor beta 73                  |
| MAP3K77  | transforming growth factor beta 74                  |
| MAP3K78  | transforming growth factor beta 75                  |
| MAP3K79  | transforming growth factor beta 76                  |
| MAP3K80  | transforming growth factor beta 77                  |
| MAP3K81  | transforming growth factor beta 78                  |
| MAP3K82  | transforming growth factor beta 79                  |
| MAP3K83  | transforming growth factor beta 80                  |
| MAP3K84  | transforming growth factor beta 81                  |
| MAP3K85  | transforming growth factor beta 82                  |
| MAP3K86  | transforming growth factor beta 83                  |
| MAP3K87  | transforming growth factor beta 84                  |
| MAP3K88  | transforming growth factor beta 85                  |
| MAP3K89  | transforming growth factor beta 86                  |
| MAP3K90  | transforming growth factor beta 87                  |
| MAP3K91  | transforming growth factor beta 88                  |
| MAP3K92  | transforming growth factor beta 89                  |
| MAP3K93  | transforming growth factor beta 90                  |
| MAP3K94  | transforming growth factor beta 91                  |
| MAP3K95  | transforming growth factor beta 92                  |
| MAP3K96  | transforming growth factor beta 93                  |
| MAP3K97  | transforming growth factor beta 94                  |
| MAP3K98  | transforming growth factor beta 95                  |
| MAP3K99  | transforming growth factor beta 96                  |
| MAP3K100 | transforming growth factor beta 97                  |
| MAP3K101 | transforming growth factor beta 98                  |
| MAP3K102 | transforming growth factor beta 99                  |
| MAP3K103 | transforming growth factor beta 100                 |

Infectious disease

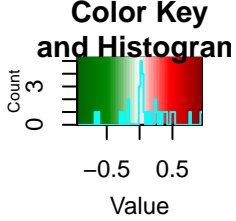

## Vitamin digestion and absorption hsa04977

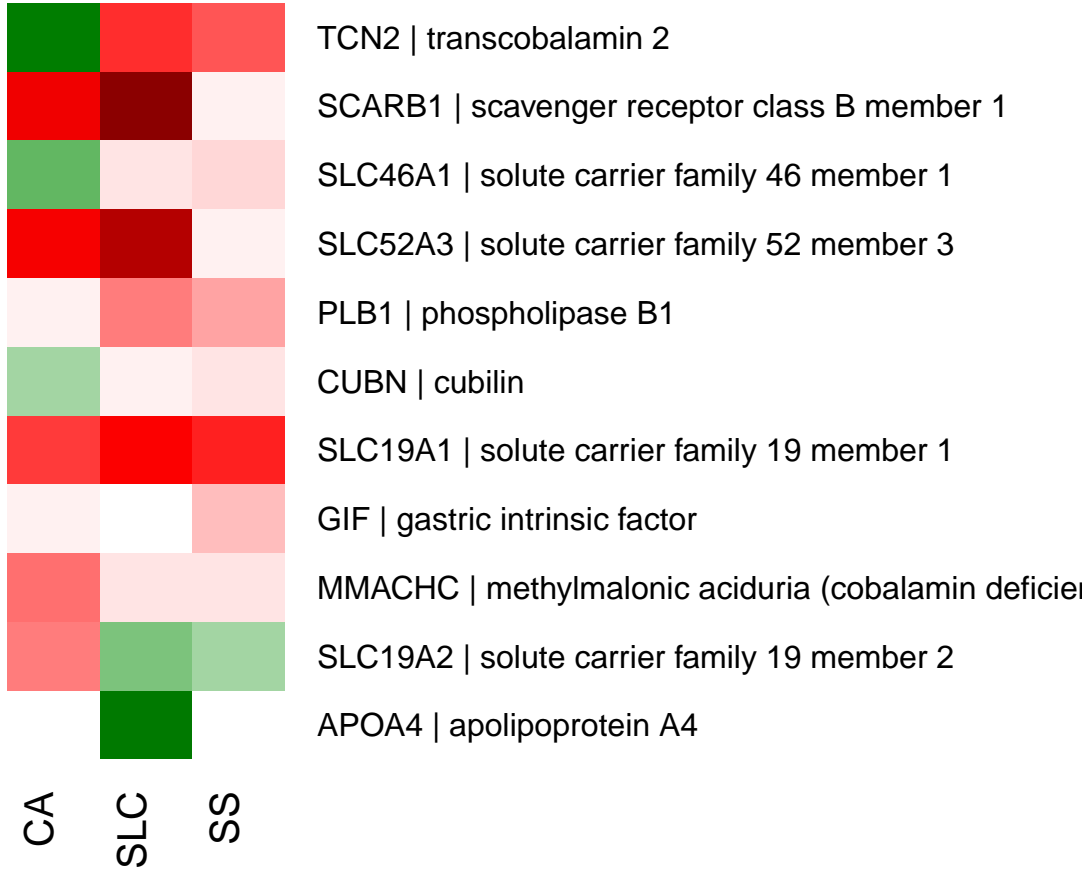

Other

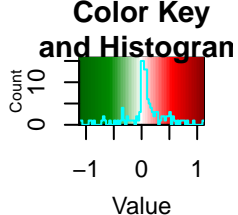

# Morphine addiction

## hsa05032

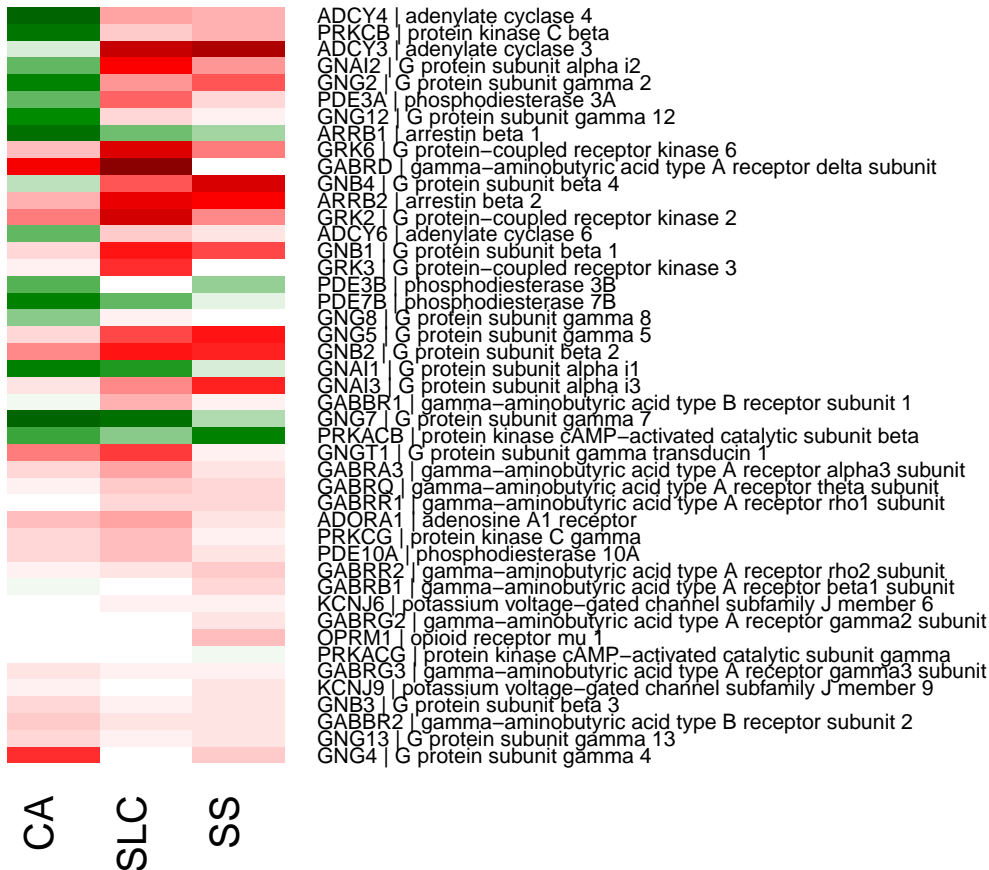

Other

# Ribosome biogenesis in eukaryotes

## hsa03008

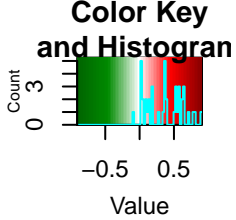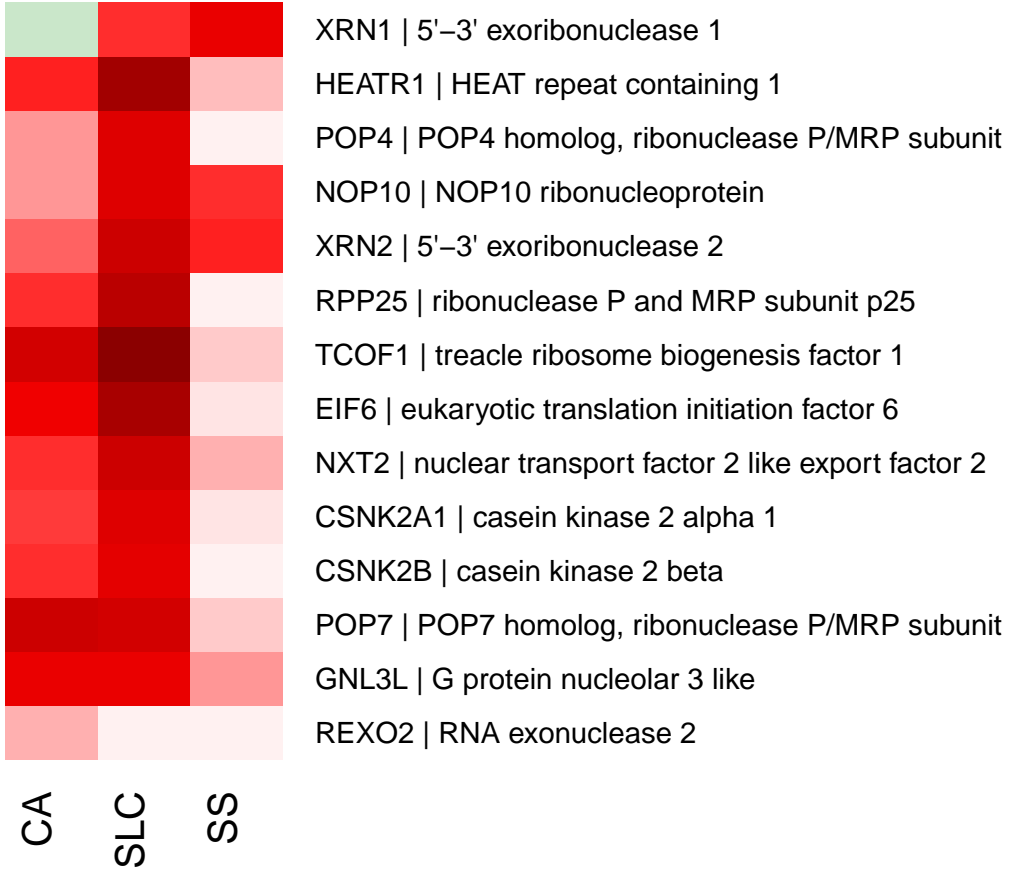

Other

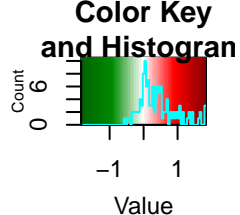

## p53 signaling pathway hsa04115

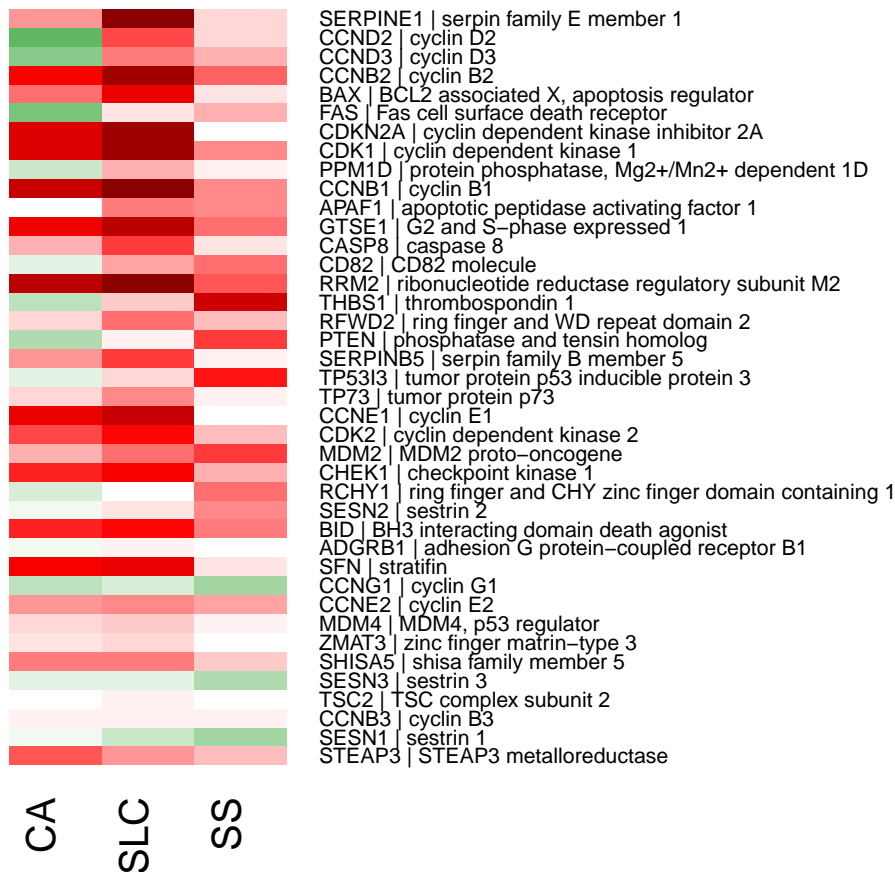

Other

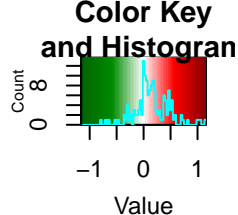

# Glycerophospholipid metabolism

## hsa00564

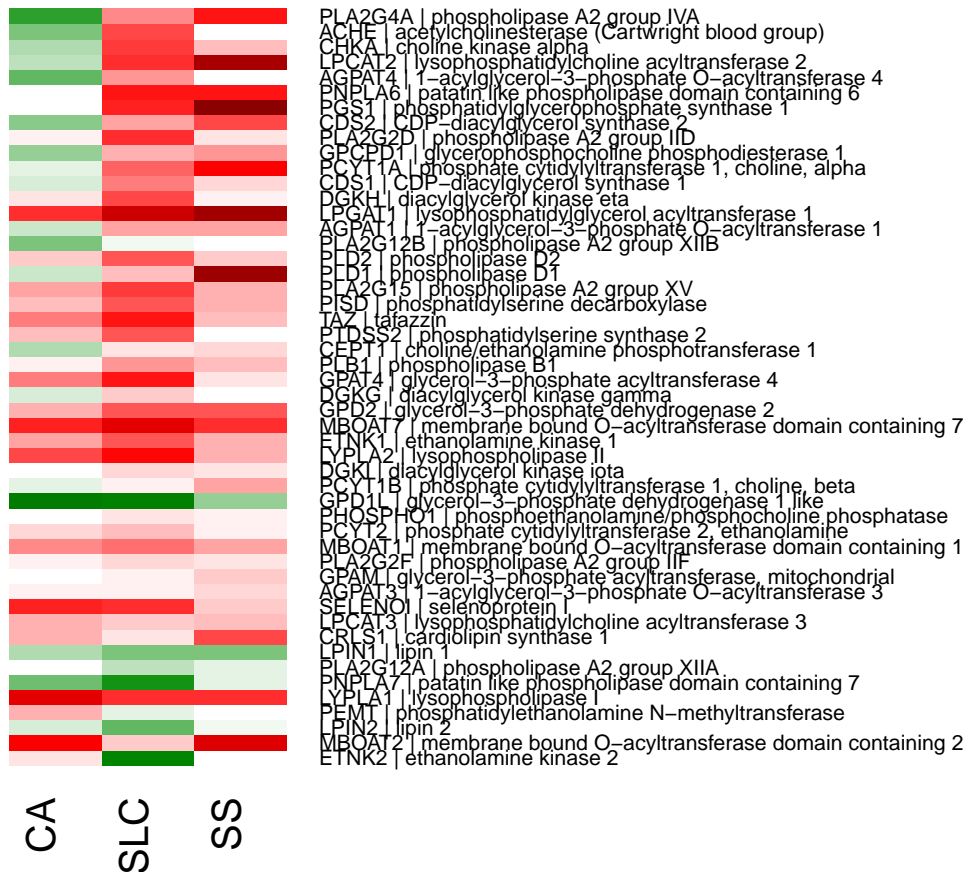

Other

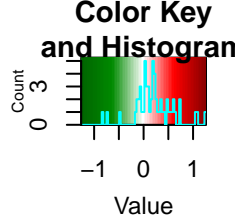

## Dorso-ventral axis formation

### hsa04320

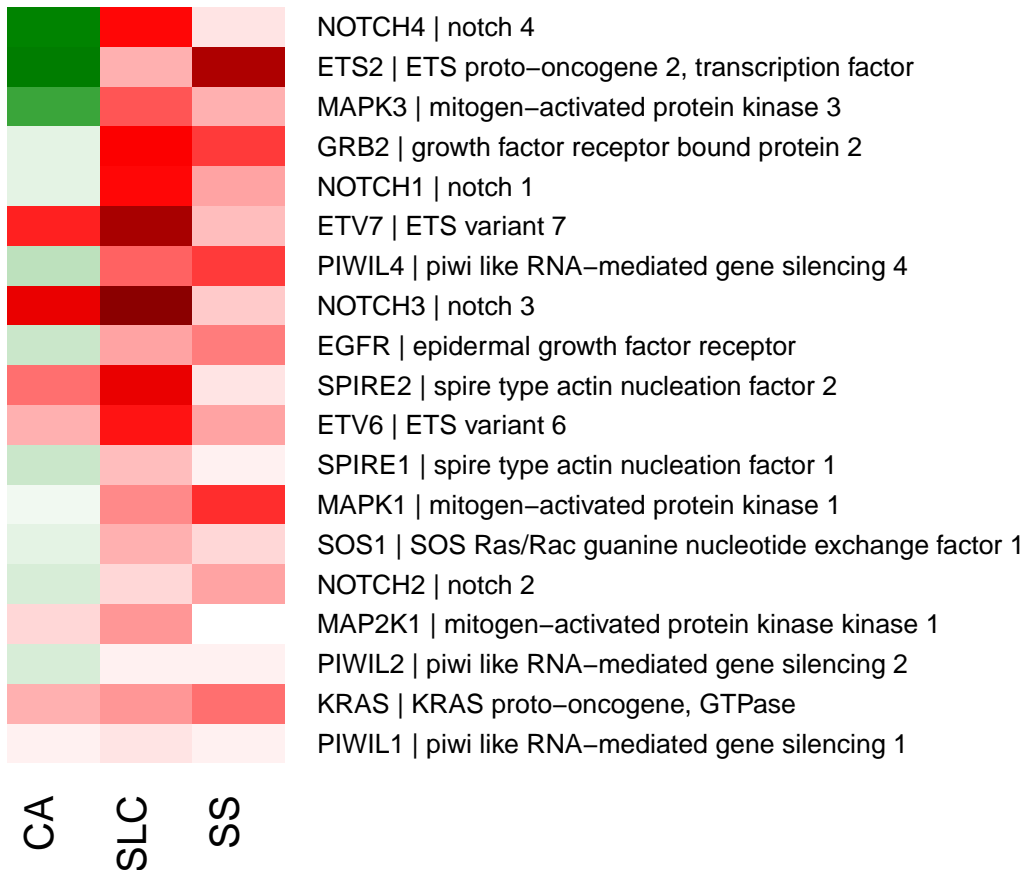

Other

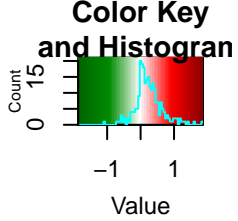

# Osteoclast differentiation

## hsa04380

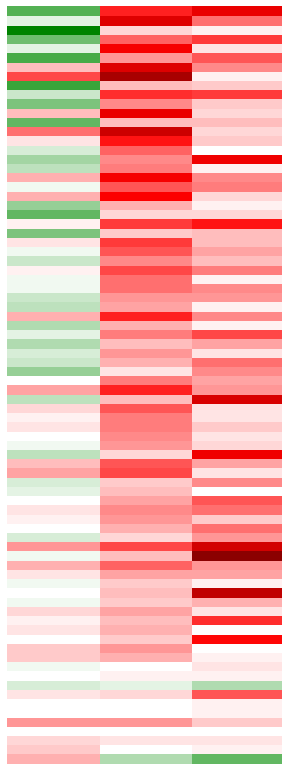

CA

SLC

SS

- SIRPA | signal regulatory protein alpha
- ITGAE | integrin alpha 4
- ITGAE2 | integrin alpha 4 receptor beta receptor 2
- KIT | KIT-like tyrosine kinase receptor 1
- KITLG | kit ligand
- KITLG2 | kit ligand subunit alpha chain
- CSF1M2 | colony-stimulating factor 1 receptor expressed on myeloid cells 2
- CSF1R | colony-stimulating factor 1 receptor
- CSF1R3 | colony-stimulating factor 1 receptor subunit gamma
- NFKB2 | nuclear factor kappa B subunit 2
- NFKB3 | nuclear factor kappa B subunit 3
- NFKB1 | nuclear factor kappa B subunit 1
- FOSL1 | fos-like 1 transcription factor
- FOSL2 | fos-like 2 transcription factor
- FOSL3 | fos-like 3 transcription factor
- FOSL4 | fos-like 4 transcription factor
- FOSL5 | fos-like 5 transcription factor
- FOSL6 | fos-like 6 transcription factor
- FOSL7 | fos-like 7 transcription factor
- FOSL8 | fos-like 8 transcription factor
- FOSL9 | fos-like 9 transcription factor
- FOSL10 | fos-like 10 transcription factor
- FOSL11 | fos-like 11 transcription factor
- FOSL12 | fos-like 12 transcription factor
- FOSL13 | fos-like 13 transcription factor
- FOSL14 | fos-like 14 transcription factor
- FOSL15 | fos-like 15 transcription factor
- FOSL16 | fos-like 16 transcription factor
- FOSL17 | fos-like 17 transcription factor
- FOSL18 | fos-like 18 transcription factor
- FOSL19 | fos-like 19 transcription factor
- FOSL20 | fos-like 20 transcription factor
- FOSL21 | fos-like 21 transcription factor
- FOSL22 | fos-like 22 transcription factor
- FOSL23 | fos-like 23 transcription factor
- FOSL24 | fos-like 24 transcription factor
- FOSL25 | fos-like 25 transcription factor
- FOSL26 | fos-like 26 transcription factor
- FOSL27 | fos-like 27 transcription factor
- FOSL28 | fos-like 28 transcription factor
- FOSL29 | fos-like 29 transcription factor
- FOSL30 | fos-like 30 transcription factor
- FOSL31 | fos-like 31 transcription factor
- FOSL32 | fos-like 32 transcription factor
- FOSL33 | fos-like 33 transcription factor
- FOSL34 | fos-like 34 transcription factor
- FOSL35 | fos-like 35 transcription factor
- FOSL36 | fos-like 36 transcription factor
- FOSL37 | fos-like 37 transcription factor
- FOSL38 | fos-like 38 transcription factor
- FOSL39 | fos-like 39 transcription factor
- FOSL40 | fos-like 40 transcription factor
- FOSL41 | fos-like 41 transcription factor
- FOSL42 | fos-like 42 transcription factor
- FOSL43 | fos-like 43 transcription factor
- FOSL44 | fos-like 44 transcription factor
- FOSL45 | fos-like 45 transcription factor
- FOSL46 | fos-like 46 transcription factor
- FOSL47 | fos-like 47 transcription factor
- FOSL48 | fos-like 48 transcription factor
- FOSL49 | fos-like 49 transcription factor
- FOSL50 | fos-like 50 transcription factor
- FOSL51 | fos-like 51 transcription factor
- FOSL52 | fos-like 52 transcription factor
- FOSL53 | fos-like 53 transcription factor
- FOSL54 | fos-like 54 transcription factor
- FOSL55 | fos-like 55 transcription factor
- FOSL56 | fos-like 56 transcription factor
- FOSL57 | fos-like 57 transcription factor
- FOSL58 | fos-like 58 transcription factor
- FOSL59 | fos-like 59 transcription factor
- FOSL60 | fos-like 60 transcription factor
- FOSL61 | fos-like 61 transcription factor
- FOSL62 | fos-like 62 transcription factor
- FOSL63 | fos-like 63 transcription factor
- FOSL64 | fos-like 64 transcription factor
- FOSL65 | fos-like 65 transcription factor
- FOSL66 | fos-like 66 transcription factor
- FOSL67 | fos-like 67 transcription factor
- FOSL68 | fos-like 68 transcription factor
- FOSL69 | fos-like 69 transcription factor
- FOSL70 | fos-like 70 transcription factor
- FOSL71 | fos-like 71 transcription factor
- FOSL72 | fos-like 72 transcription factor
- FOSL73 | fos-like 73 transcription factor
- FOSL74 | fos-like 74 transcription factor
- FOSL75 | fos-like 75 transcription factor
- FOSL76 | fos-like 76 transcription factor
- FOSL77 | fos-like 77 transcription factor
- FOSL78 | fos-like 78 transcription factor
- FOSL79 | fos-like 79 transcription factor
- FOSL80 | fos-like 80 transcription factor
- FOSL81 | fos-like 81 transcription factor
- FOSL82 | fos-like 82 transcription factor
- FOSL83 | fos-like 83 transcription factor
- FOSL84 | fos-like 84 transcription factor
- FOSL85 | fos-like 85 transcription factor
- FOSL86 | fos-like 86 transcription factor
- FOSL87 | fos-like 87 transcription factor
- FOSL88 | fos-like 88 transcription factor
- FOSL89 | fos-like 89 transcription factor
- FOSL90 | fos-like 90 transcription factor
- FOSL91 | fos-like 91 transcription factor
- FOSL92 | fos-like 92 transcription factor
- FOSL93 | fos-like 93 transcription factor
- FOSL94 | fos-like 94 transcription factor
- FOSL95 | fos-like 95 transcription factor
- FOSL96 | fos-like 96 transcription factor
- FOSL97 | fos-like 97 transcription factor
- FOSL98 | fos-like 98 transcription factor
- FOSL99 | fos-like 99 transcription factor
- FOSL100 | fos-like 100 transcription factor

Other





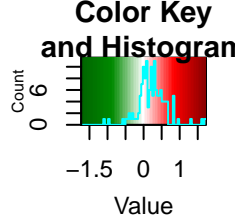

# Adherens junction hsa04520

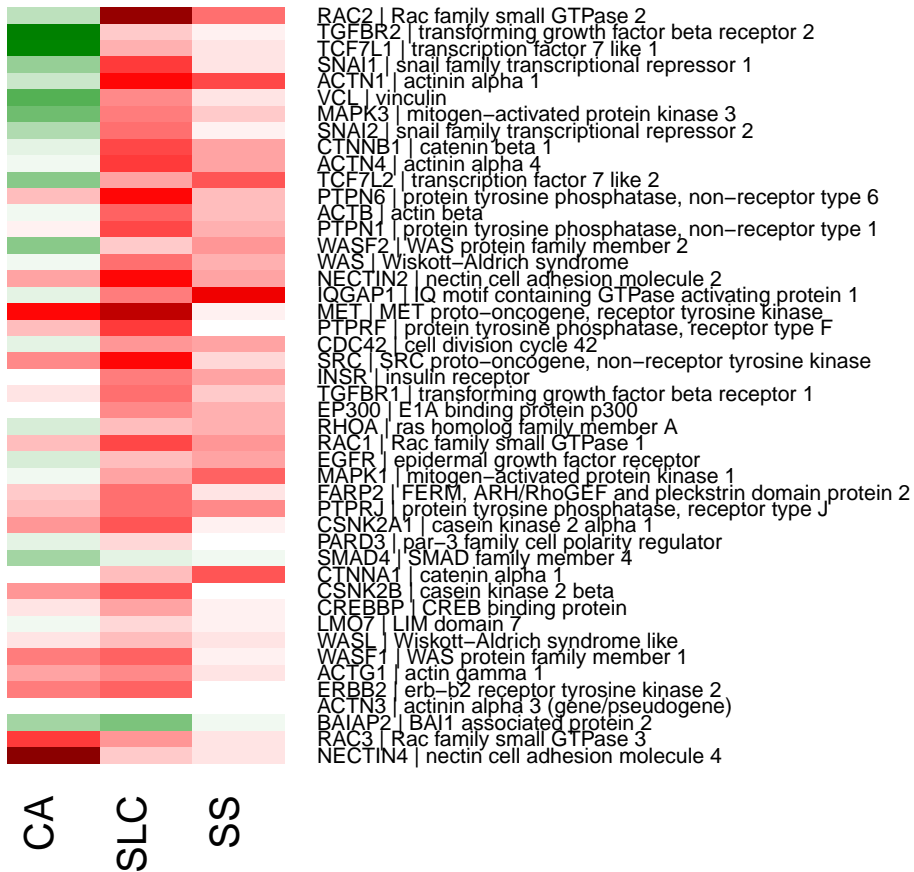

Other

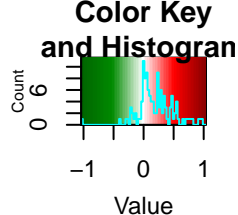

# Synaptic vesicle cycle

## hsa04721

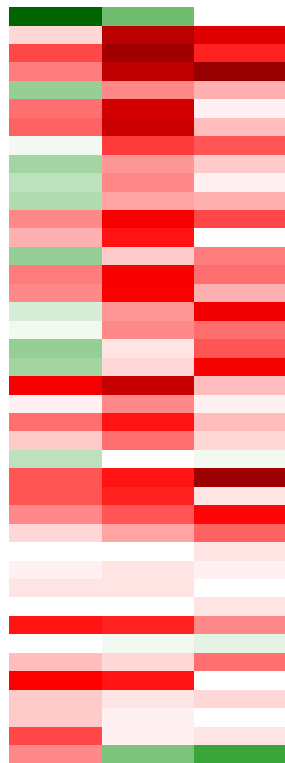

CA

SLC

SS

VAMP2 | vesicle associated membrane protein 2  
 AP2B1 | adaptor related protein complex 2 beta 1 subunit  
 TCIRG1 | T-cell immune regulator 1, ATPase H+ transporting V0 subunit a3  
 ATP6V1C1 | ATPase H+ transporting V1 subunit C1  
 ATP6V1E1 | ATPase H+ transporting V1 subunit E1  
 CPLX1 | complexin 1  
 AP2M1 | adaptor related protein complex 2 mu 1 subunit  
 DNM2 | dynamin 2  
 SYT1 | synaptotagmin 1  
 AP2A2 | adaptor related protein complex 2 alpha 2 subunit  
 ATP6V0A1 | ATPase H+ transporting V0 subunit a1  
 ATP6V0B | ATPase H+ transporting V0 subunit b  
 DNM1 | dynamin 1  
 CLTB | clathrin light chain B  
 CLTC | clathrin heavy chain  
 AP2A1 | adaptor related protein complex 2 alpha 1 subunit  
 ATP6V0E1 | ATPase H+ transporting V0 subunit e1  
 ATP6V1B2 | ATPase H+ transporting V1 subunit B2  
 NAPA | NSF attachment protein alpha  
 ATP6V0D1 | ATPase H+ transporting V0 subunit d1  
 STX1A | syntaxin 1A  
 SNAP25 | synaptosome associated protein 25  
 AP2S1 | adaptor related protein complex 2 sigma 1 subunit  
 ATP6V0C | ATPase H+ transporting V0 subunit c  
 DNM3 | dynamin 3  
 STX3 | syntaxin 3  
 CLTA | clathrin light chain A  
 ATP6V1A | ATPase H+ transporting V1 subunit A  
 ATP6V1H | ATPase H+ transporting V1 subunit H  
 SLC18A1 | solute carrier family 18 member A1  
 STX1B | syntaxin 1B  
 ATP6V1B1 | ATPase H+ transporting V1 subunit B1  
 SLC17A6 | solute carrier family 17 member 6  
 NSF | N-ethylmaleimide sensitive factor, vesicle fusing ATPase  
 RIMS1 | regulating synaptic membrane exocytosis 1  
 CLTCL1 | clathrin heavy chain like 1  
 ATP6V1F | ATPase H+ transporting V1 subunit F  
 UNC13A | unc-13 homolog A  
 SLC18A3 | solute carrier family 18 member A3  
 ATP6V1C2 | ATPase H+ transporting V1 subunit C2  
 ATP6V0E2 | ATPase H+ transporting V0 subunit e2

Other



# Amyotrophic lateral sclerosis (ALS)

hsa05014

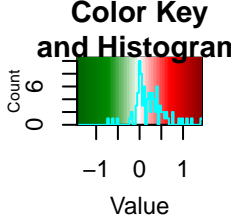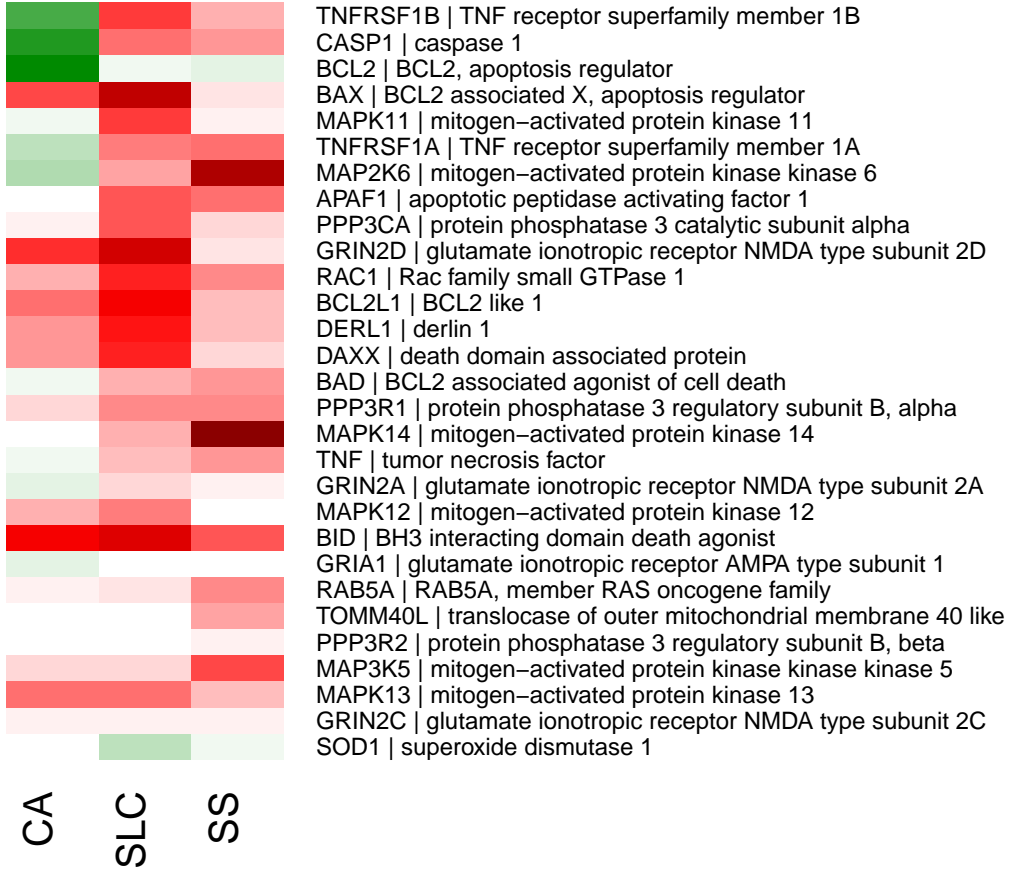

Other



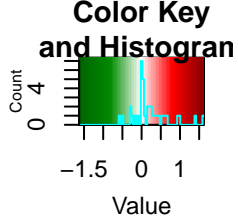

## Primary immunodeficiency hsa05340

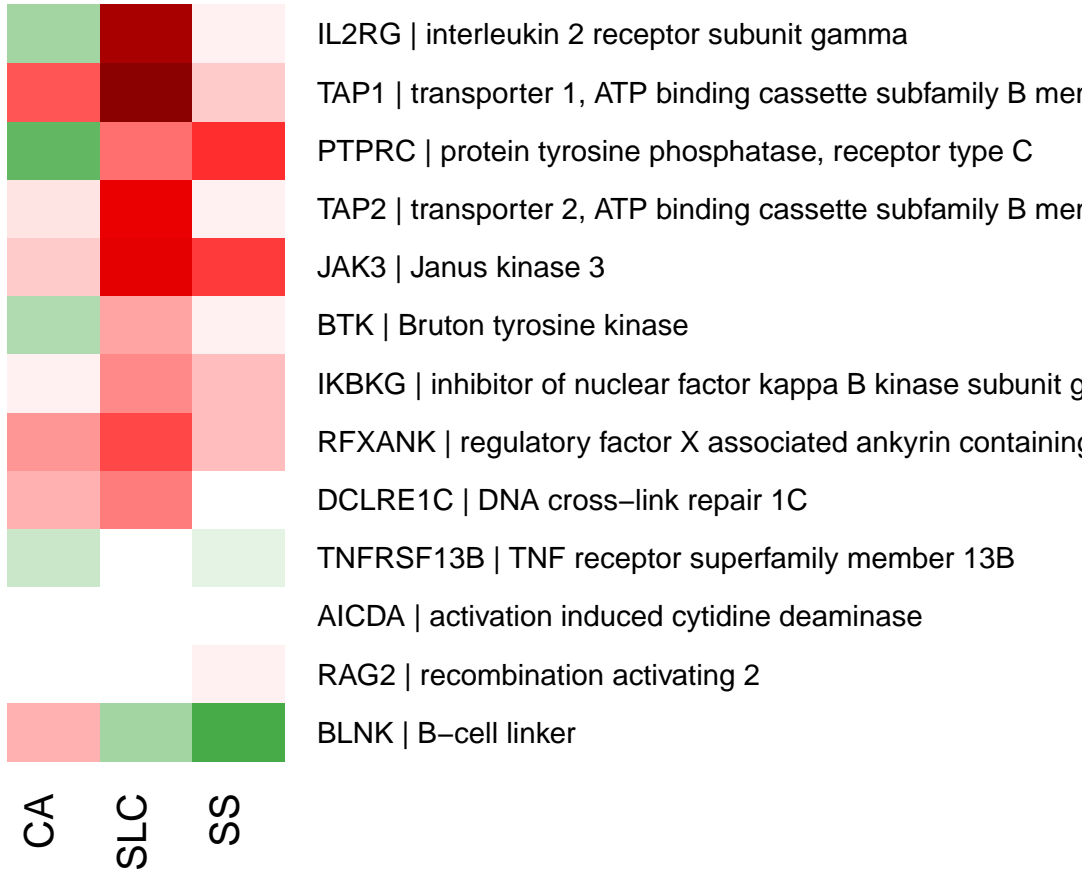

Other





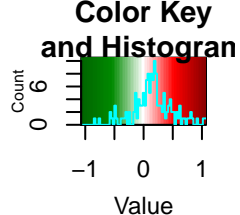

# ErbB signaling pathway hsa04012

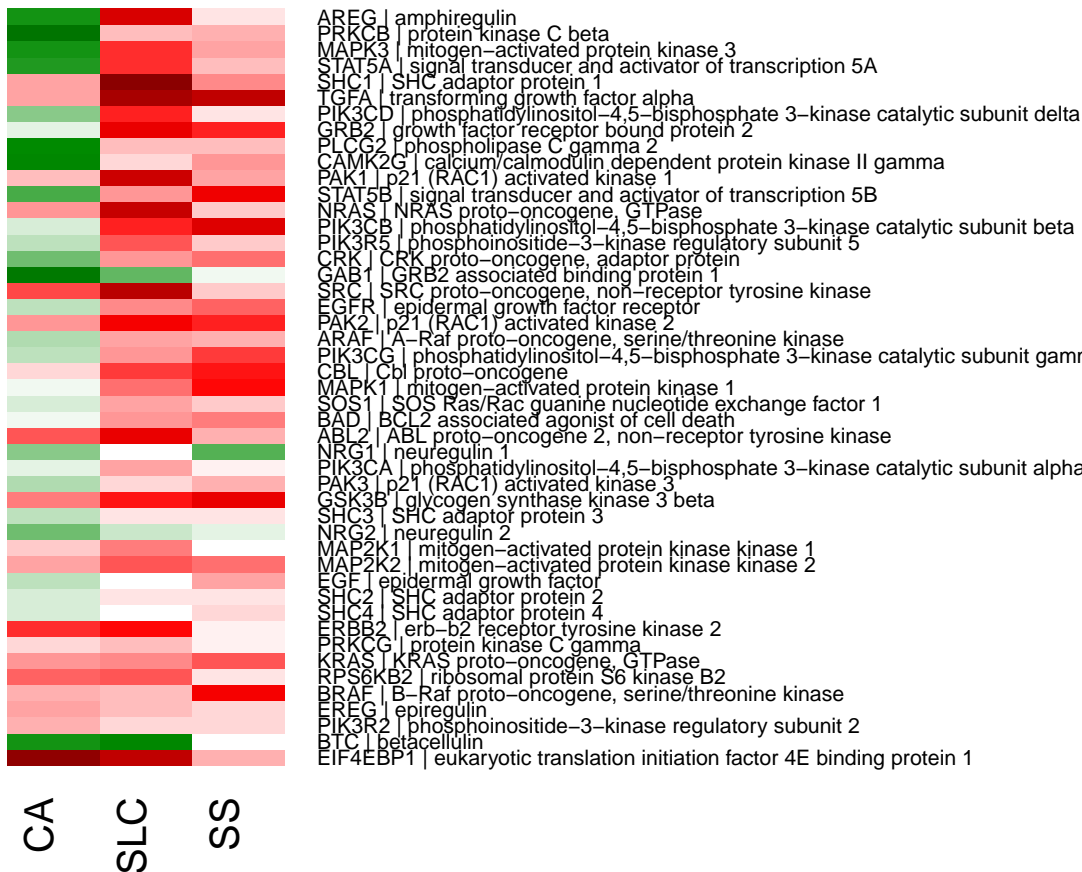

Signal transduction

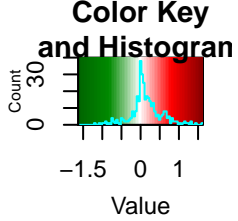

# Rap1 signaling pathway hsa04015

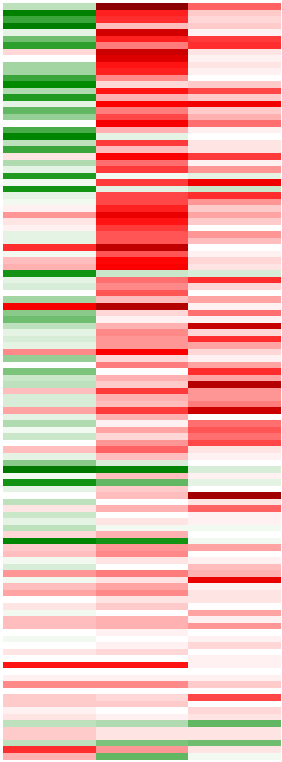

CA  
SLC  
SS

- RAC2 | Rac family small GTPase 2
- GRB2 | Ras guanine nucleotide exchange factor 2
- SHC1 | Src homology 2 domain, ankyrin repeat and PH domain 3
- PIP3 | Phosphatidylinositol (3-OH) precursor of protein-binding family B member 1 interacting protein
- PIP2 | Phosphatidylinositol (4,5)-bisphosphate
- PLD1 | Phospholipase C domain containing protein 1
- PLD2 | Phospholipase C domain containing protein 2
- PLD3 | Phospholipase C domain containing protein 3
- PLD4 | Phospholipase C domain containing protein 4
- PLD5 | Phospholipase C domain containing protein 5
- PLD6 | Phospholipase C domain containing protein 6
- PLD7 | Phospholipase C domain containing protein 7
- PLD8 | Phospholipase C domain containing protein 8
- PLD9 | Phospholipase C domain containing protein 9
- PLD10 | Phospholipase C domain containing protein 10
- PLD11 | Phospholipase C domain containing protein 11
- PLD12 | Phospholipase C domain containing protein 12
- PLD13 | Phospholipase C domain containing protein 13
- PLD14 | Phospholipase C domain containing protein 14
- PLD15 | Phospholipase C domain containing protein 15
- PLD16 | Phospholipase C domain containing protein 16
- PLD17 | Phospholipase C domain containing protein 17
- PLD18 | Phospholipase C domain containing protein 18
- PLD19 | Phospholipase C domain containing protein 19
- PLD20 | Phospholipase C domain containing protein 20
- PLD21 | Phospholipase C domain containing protein 21
- PLD22 | Phospholipase C domain containing protein 22
- PLD23 | Phospholipase C domain containing protein 23
- PLD24 | Phospholipase C domain containing protein 24
- PLD25 | Phospholipase C domain containing protein 25
- PLD26 | Phospholipase C domain containing protein 26
- PLD27 | Phospholipase C domain containing protein 27
- PLD28 | Phospholipase C domain containing protein 28
- PLD29 | Phospholipase C domain containing protein 29
- PLD30 | Phospholipase C domain containing protein 30
- PLD31 | Phospholipase C domain containing protein 31
- PLD32 | Phospholipase C domain containing protein 32
- PLD33 | Phospholipase C domain containing protein 33
- PLD34 | Phospholipase C domain containing protein 34
- PLD35 | Phospholipase C domain containing protein 35
- PLD36 | Phospholipase C domain containing protein 36
- PLD37 | Phospholipase C domain containing protein 37
- PLD38 | Phospholipase C domain containing protein 38
- PLD39 | Phospholipase C domain containing protein 39
- PLD40 | Phospholipase C domain containing protein 40
- PLD41 | Phospholipase C domain containing protein 41
- PLD42 | Phospholipase C domain containing protein 42
- PLD43 | Phospholipase C domain containing protein 43
- PLD44 | Phospholipase C domain containing protein 44
- PLD45 | Phospholipase C domain containing protein 45
- PLD46 | Phospholipase C domain containing protein 46
- PLD47 | Phospholipase C domain containing protein 47
- PLD48 | Phospholipase C domain containing protein 48
- PLD49 | Phospholipase C domain containing protein 49
- PLD50 | Phospholipase C domain containing protein 50
- PLD51 | Phospholipase C domain containing protein 51
- PLD52 | Phospholipase C domain containing protein 52
- PLD53 | Phospholipase C domain containing protein 53
- PLD54 | Phospholipase C domain containing protein 54
- PLD55 | Phospholipase C domain containing protein 55
- PLD56 | Phospholipase C domain containing protein 56
- PLD57 | Phospholipase C domain containing protein 57
- PLD58 | Phospholipase C domain containing protein 58
- PLD59 | Phospholipase C domain containing protein 59
- PLD60 | Phospholipase C domain containing protein 60
- PLD61 | Phospholipase C domain containing protein 61
- PLD62 | Phospholipase C domain containing protein 62
- PLD63 | Phospholipase C domain containing protein 63
- PLD64 | Phospholipase C domain containing protein 64
- PLD65 | Phospholipase C domain containing protein 65
- PLD66 | Phospholipase C domain containing protein 66
- PLD67 | Phospholipase C domain containing protein 67
- PLD68 | Phospholipase C domain containing protein 68
- PLD69 | Phospholipase C domain containing protein 69
- PLD70 | Phospholipase C domain containing protein 70
- PLD71 | Phospholipase C domain containing protein 71
- PLD72 | Phospholipase C domain containing protein 72
- PLD73 | Phospholipase C domain containing protein 73
- PLD74 | Phospholipase C domain containing protein 74
- PLD75 | Phospholipase C domain containing protein 75
- PLD76 | Phospholipase C domain containing protein 76
- PLD77 | Phospholipase C domain containing protein 77
- PLD78 | Phospholipase C domain containing protein 78
- PLD79 | Phospholipase C domain containing protein 79
- PLD80 | Phospholipase C domain containing protein 80
- PLD81 | Phospholipase C domain containing protein 81
- PLD82 | Phospholipase C domain containing protein 82
- PLD83 | Phospholipase C domain containing protein 83
- PLD84 | Phospholipase C domain containing protein 84
- PLD85 | Phospholipase C domain containing protein 85
- PLD86 | Phospholipase C domain containing protein 86
- PLD87 | Phospholipase C domain containing protein 87
- PLD88 | Phospholipase C domain containing protein 88
- PLD89 | Phospholipase C domain containing protein 89
- PLD90 | Phospholipase C domain containing protein 90
- PLD91 | Phospholipase C domain containing protein 91
- PLD92 | Phospholipase C domain containing protein 92
- PLD93 | Phospholipase C domain containing protein 93
- PLD94 | Phospholipase C domain containing protein 94
- PLD95 | Phospholipase C domain containing protein 95
- PLD96 | Phospholipase C domain containing protein 96
- PLD97 | Phospholipase C domain containing protein 97
- PLD98 | Phospholipase C domain containing protein 98
- PLD99 | Phospholipase C domain containing protein 99
- PLD100 | Phospholipase C domain containing protein 100

Signal transduction

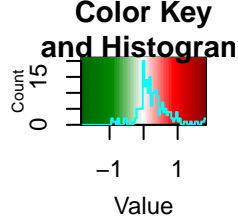

# HIF-1 signaling pathway hsa04066

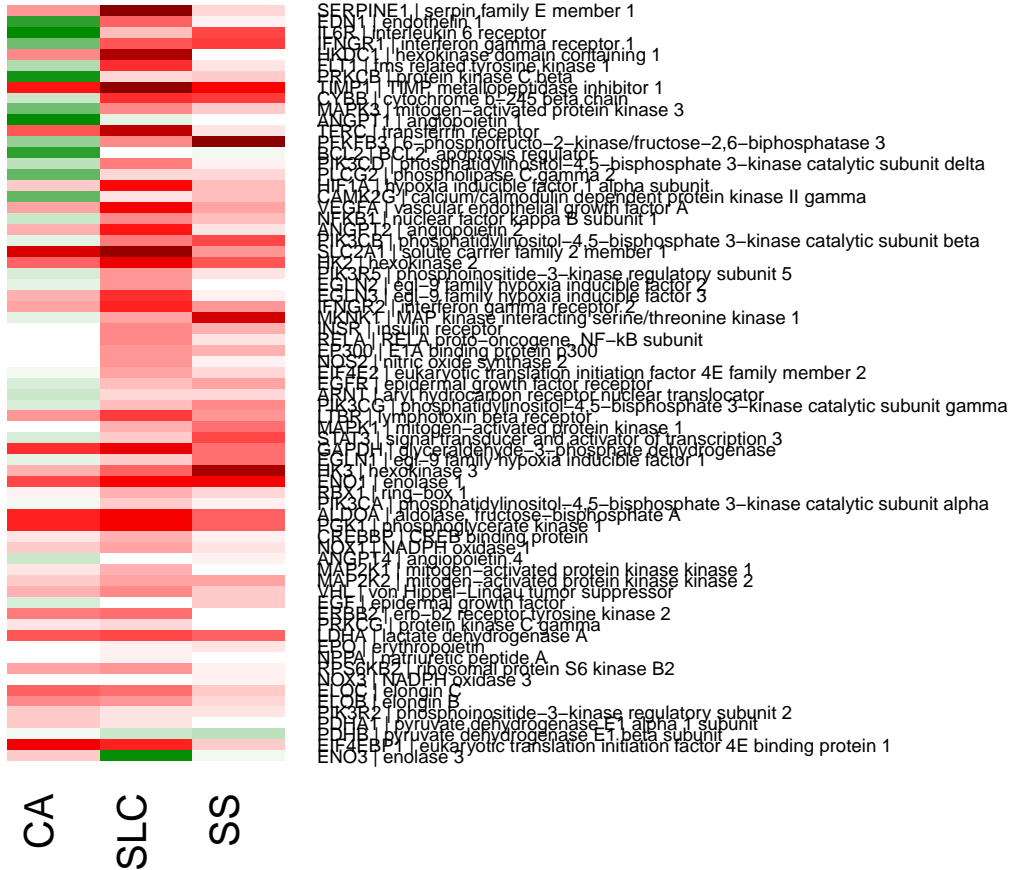

Signal transduction

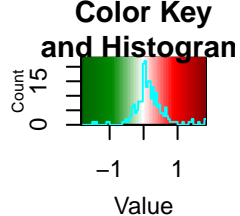

## FoxO signaling pathway hsa04068

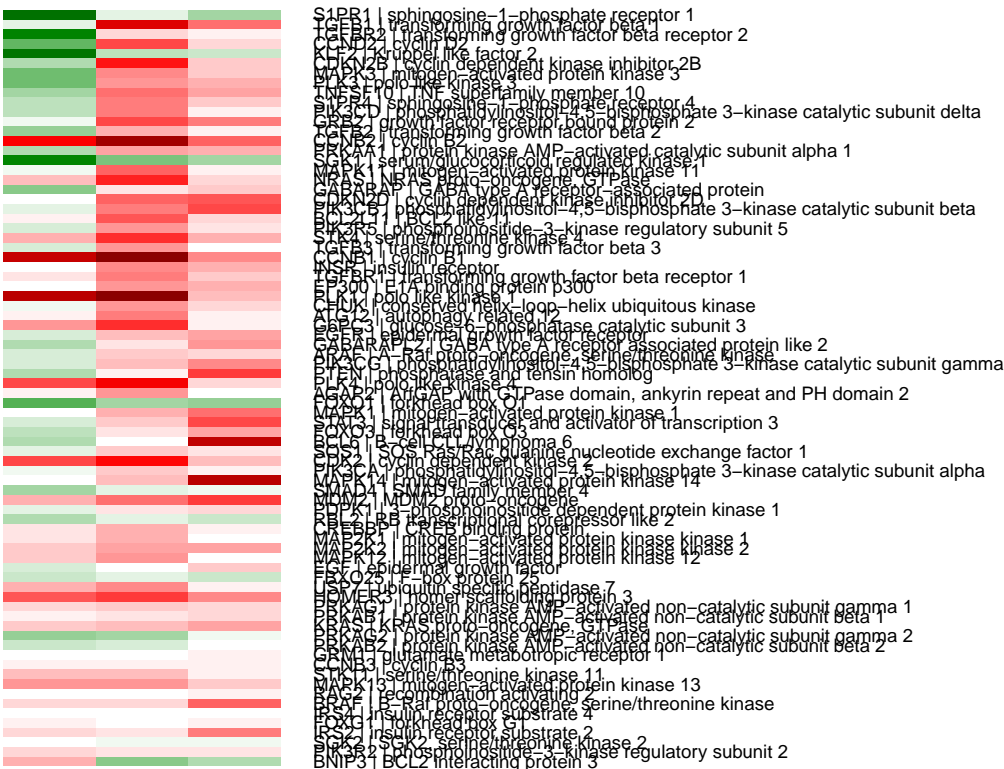

CA  
SLC  
SS

Signal transduction



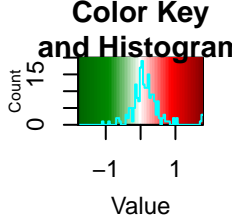

## AMPK signaling pathway hsa04152

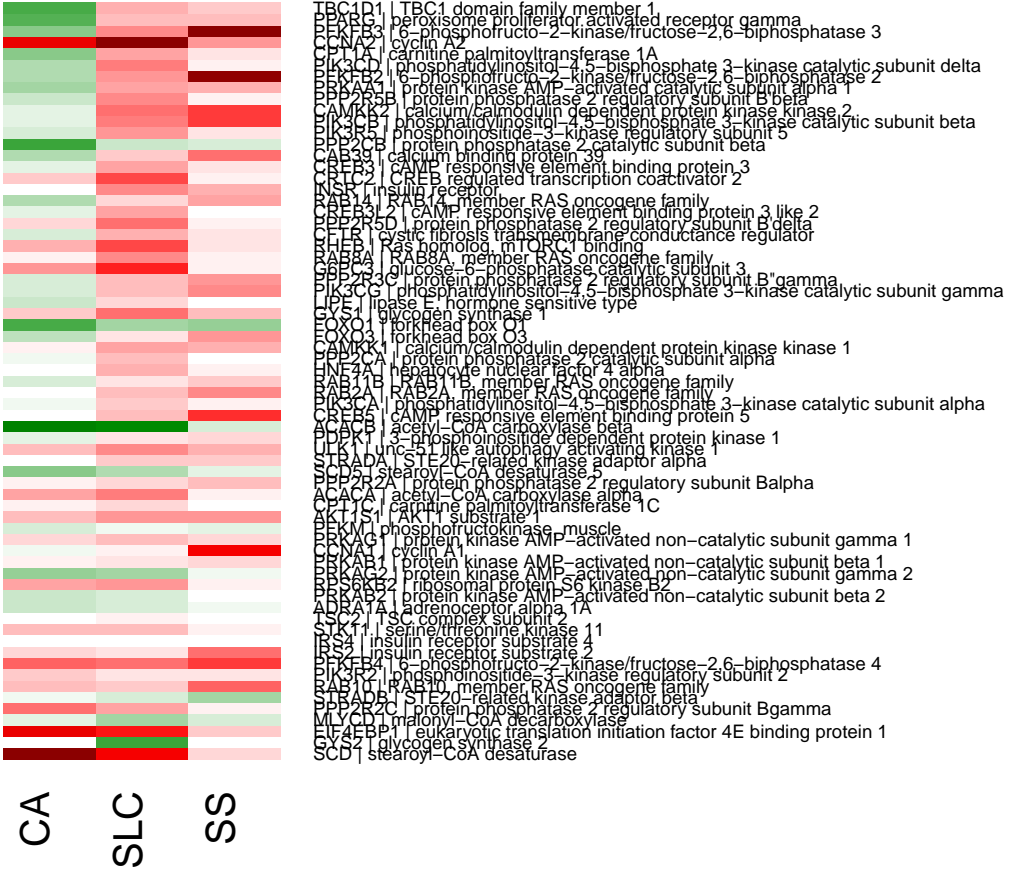

Signal transduction

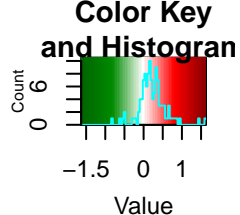

# VEGF signaling pathway

## hsa04370

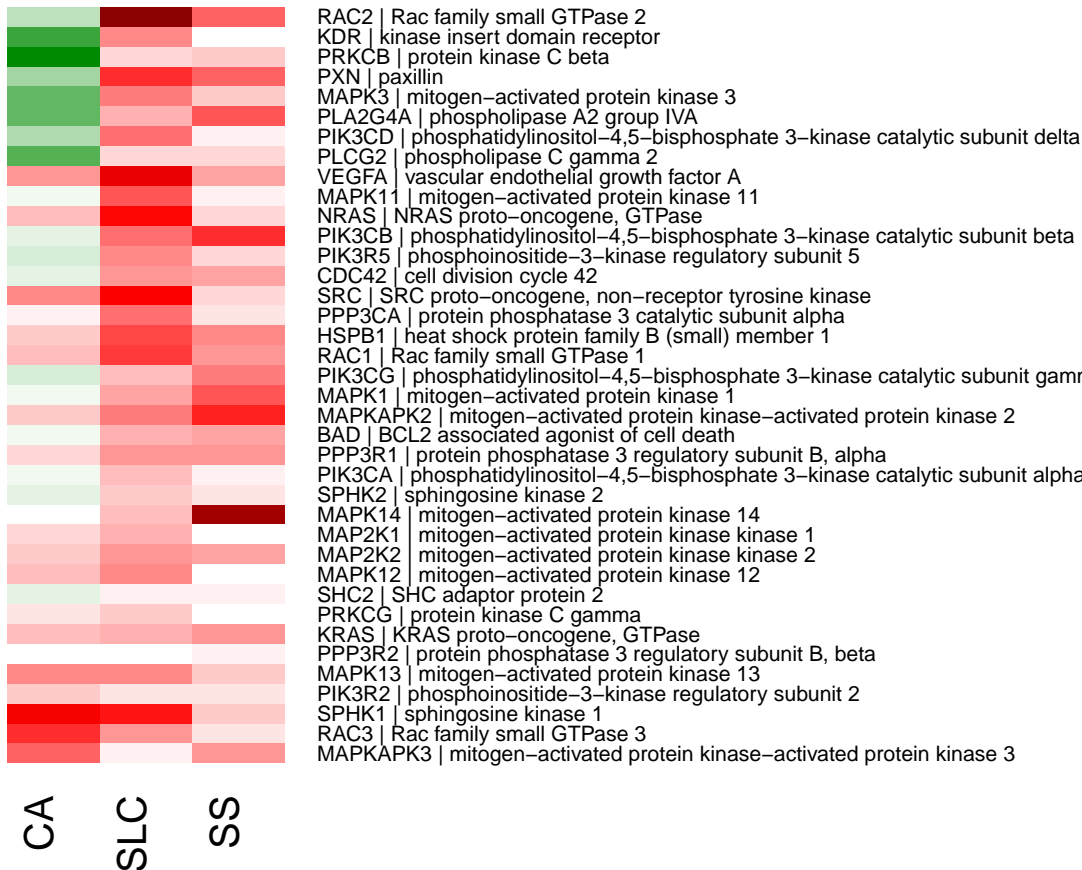

Signal transduction



# Jak-STAT signaling pathway

## hsa04630

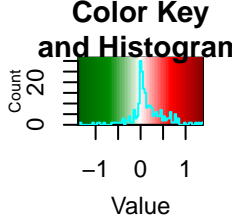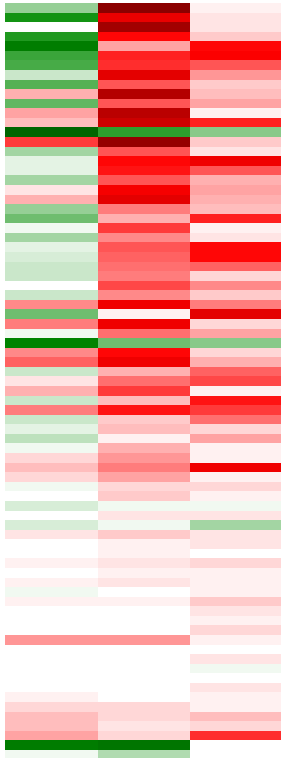

CA

SLC

SS

IL2BG1 interleukin 2 receptor subunit gamma  
 IL2RA2 interleukin 2 receptor subunit alpha 2  
 IL2RA1 interleukin 2 receptor subunit alpha 1  
 IL6R1 interleukin 6 receptor  
 IL15RA interleukin 15 receptor subunit alpha  
 IL15RB2 interleukin 15 receptor subunit beta 2  
 IL15RB1 interleukin 15 receptor subunit beta 1  
 IL6 family cytokine  
 JAK2 Janus kinase 2  
 STAT3 signal transducer and activator of transcription 3  
 STAT1 signal transducer and activator of transcription 1  
 STAT2 signal transducer and activator of transcription 2  
 SH2B1 SH2 domain containing protein 1  
 SH2B2 SH2 domain containing protein 2  
 SH2B3 SH2 domain containing protein 3  
 SH2B4 SH2 domain containing protein 4  
 SH2B5 SH2 domain containing protein 5  
 SH2B6 SH2 domain containing protein 6  
 SH2B7 SH2 domain containing protein 7  
 SH2B8 SH2 domain containing protein 8  
 SH2B9 SH2 domain containing protein 9  
 SH2B10 SH2 domain containing protein 10  
 SH2B11 SH2 domain containing protein 11  
 SH2B12 SH2 domain containing protein 12  
 SH2B13 SH2 domain containing protein 13  
 SH2B14 SH2 domain containing protein 14  
 SH2B15 SH2 domain containing protein 15  
 SH2B16 SH2 domain containing protein 16  
 SH2B17 SH2 domain containing protein 17  
 SH2B18 SH2 domain containing protein 18  
 SH2B19 SH2 domain containing protein 19  
 SH2B20 SH2 domain containing protein 20  
 SH2B21 SH2 domain containing protein 21  
 SH2B22 SH2 domain containing protein 22  
 SH2B23 SH2 domain containing protein 23  
 SH2B24 SH2 domain containing protein 24  
 SH2B25 SH2 domain containing protein 25  
 SH2B26 SH2 domain containing protein 26  
 SH2B27 SH2 domain containing protein 27  
 SH2B28 SH2 domain containing protein 28  
 SH2B29 SH2 domain containing protein 29  
 SH2B30 SH2 domain containing protein 30  
 SH2B31 SH2 domain containing protein 31  
 SH2B32 SH2 domain containing protein 32  
 SH2B33 SH2 domain containing protein 33  
 SH2B34 SH2 domain containing protein 34  
 SH2B35 SH2 domain containing protein 35  
 SH2B36 SH2 domain containing protein 36  
 SH2B37 SH2 domain containing protein 37  
 SH2B38 SH2 domain containing protein 38  
 SH2B39 SH2 domain containing protein 39  
 SH2B40 SH2 domain containing protein 40  
 SH2B41 SH2 domain containing protein 41  
 SH2B42 SH2 domain containing protein 42  
 SH2B43 SH2 domain containing protein 43  
 SH2B44 SH2 domain containing protein 44  
 SH2B45 SH2 domain containing protein 45  
 SH2B46 SH2 domain containing protein 46  
 SH2B47 SH2 domain containing protein 47  
 SH2B48 SH2 domain containing protein 48  
 SH2B49 SH2 domain containing protein 49  
 SH2B50 SH2 domain containing protein 50  
 SH2B51 SH2 domain containing protein 51  
 SH2B52 SH2 domain containing protein 52  
 SH2B53 SH2 domain containing protein 53  
 SH2B54 SH2 domain containing protein 54  
 SH2B55 SH2 domain containing protein 55  
 SH2B56 SH2 domain containing protein 56  
 SH2B57 SH2 domain containing protein 57  
 SH2B58 SH2 domain containing protein 58  
 SH2B59 SH2 domain containing protein 59  
 SH2B60 SH2 domain containing protein 60  
 SH2B61 SH2 domain containing protein 61  
 SH2B62 SH2 domain containing protein 62  
 SH2B63 SH2 domain containing protein 63  
 SH2B64 SH2 domain containing protein 64  
 SH2B65 SH2 domain containing protein 65  
 SH2B66 SH2 domain containing protein 66  
 SH2B67 SH2 domain containing protein 67  
 SH2B68 SH2 domain containing protein 68  
 SH2B69 SH2 domain containing protein 69  
 SH2B70 SH2 domain containing protein 70  
 SH2B71 SH2 domain containing protein 71  
 SH2B72 SH2 domain containing protein 72  
 SH2B73 SH2 domain containing protein 73  
 SH2B74 SH2 domain containing protein 74  
 SH2B75 SH2 domain containing protein 75  
 SH2B76 SH2 domain containing protein 76  
 SH2B77 SH2 domain containing protein 77  
 SH2B78 SH2 domain containing protein 78  
 SH2B79 SH2 domain containing protein 79  
 SH2B80 SH2 domain containing protein 80  
 SH2B81 SH2 domain containing protein 81  
 SH2B82 SH2 domain containing protein 82  
 SH2B83 SH2 domain containing protein 83  
 SH2B84 SH2 domain containing protein 84  
 SH2B85 SH2 domain containing protein 85  
 SH2B86 SH2 domain containing protein 86  
 SH2B87 SH2 domain containing protein 87  
 SH2B88 SH2 domain containing protein 88  
 SH2B89 SH2 domain containing protein 89  
 SH2B90 SH2 domain containing protein 90  
 SH2B91 SH2 domain containing protein 91  
 SH2B92 SH2 domain containing protein 92  
 SH2B93 SH2 domain containing protein 93  
 SH2B94 SH2 domain containing protein 94  
 SH2B95 SH2 domain containing protein 95  
 SH2B96 SH2 domain containing protein 96  
 SH2B97 SH2 domain containing protein 97  
 SH2B98 SH2 domain containing protein 98  
 SH2B99 SH2 domain containing protein 99  
 SH2B100 SH2 domain containing protein 100

Signal transduction



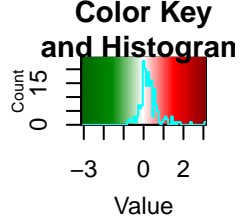

# TNF signaling pathway

## hsa04668

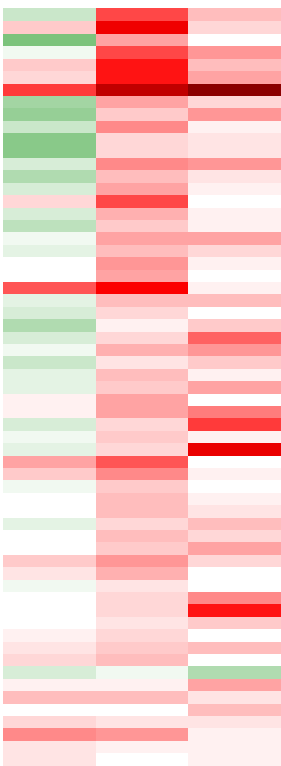

CA

SLC

SS

TNFAIP3 | TNF alpha induced protein 3  
EDN1 | endothelin 1  
JAG1 | jagged 1  
CXCL1 | e-x-c motif chemokine ligand 1  
ICAM1 | intercellular adhesion molecule 1  
TNFRSF1B | TNF receptor superfamily member 1B  
NFKB1A | NFKB inhibitor alpha  
MAP3K8 | mitogen-activated protein kinase kinase 8  
CEBPB | CCAAT/enhancer binding protein beta  
MAPK3 | mitogen-activated protein kinase 3  
VCAM1 | vascular cell adhesion molecule 1  
PLK3CD1 | phosphatidylinositol-4,5-bisphosphate 3-kinase catalytic subunit delta  
CASP7 | caspase 7  
MLK3 | mixed lineage kinase domain like pseudokinase  
CXCL3 | e-x-c motif chemokine ligand 3  
MAPK11 | mitogen-activated protein kinase 11  
MMP14 | matrix metalloproteinase 14  
TNFRSF1A | TNF receptor superfamily member 1A  
FAS | Fas cell surface death receptor  
CASP8 | CASP8 and FADD like apoptosis regulator  
PLK3CB1 | phosphatidylinositol-4,5-bisphosphate 3-kinase catalytic subunit beta  
PLK3R1 | receptor interacting serine/threonine kinase 3  
IL1B | interleukin 1 beta  
ATF6B | activating transcription factor 6 beta  
MAP2K6 | mitogen-activated protein kinase kinase 6  
CREB3 | cAMP responsive element binding protein 3  
IL18R1 | interleukin 18 receptor 1  
MMP9 | matrix metalloproteinase 3  
C/EBPB3 | cAMP responsive element binding protein 3 like 2  
RELA | RELA proto-oncogene, NF-kB subunit  
ULK1 | conserved helix-loop-helix ubiquitous kinase  
IKKG | inositol trisphosphate 3-kinase catalytic subunit gamma  
MAPK1 | mitogen-activated protein kinase 1  
FADD1 | Fas associated via death domain  
BIN3A | binamylin like  
PLK3CA | phosphatidylinositol-4,5-bisphosphate 3-kinase catalytic subunit alpha  
CREB5 | cAMP responsive element binding protein 5  
MAPK14 | mitogen-activated protein kinase 14  
MMP2 | tumor necrosis factor  
BAG4 | BC1 associated aminoacyl-tRNA synthetase 4  
MAPK12 | mitogen-activated protein kinase 12  
MAPK4 | ribosomal protein S6 kinase A5  
MAPK9 | mitogen-activated protein kinase kinase kinase 5  
MAPK13 | mitogen-activated protein kinase 13  
UCHL1 | itchy E3 ubiquitin protein ligase  
NOD2 | nucleotide binding oligomerization domain containing 2  
BCLAM5 | BCLAM family member 5 mitochondrial serine/threonine protein phosphatase  
TAB3 | TGF-beta activated kinase 1 and MAP3K7 binding protein 3

Signal transduction



### Color Key and Histogram

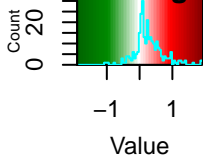

### Phagosome hsa04145

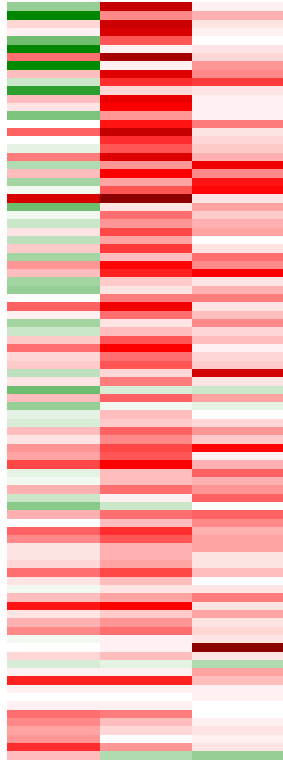

CA

SLC

SS

ITGA5 | integrin subunit alpha 5  
HLA-DP1 | major histocompatibility complex, class I, B  
HLA-EP1 | major histocompatibility complex, class I, E  
LYAR1 | tyrosine receptor kinase cassette subfamily B member  
CYBB | cytochrome b-245 beta chain  
MICA | complement C5 compatibility complex class I, C  
CD22 | B cell surface antigen binding cassette subfamily B member  
FRS3 | fibroblast growth factor receptor-like tyrosine kinase  
G12A2 | G12A RAS oncogene family  
G12A3 | G12A RAS oncogene family  
NFY2 | neutrophil cytosolic factor 2  
HTRV1 | histiocyte trophoblast integrin alpha M  
MUC20 | mucin type 2 receptor with collagenous structure  
G12A1 | G12A RAS oncogene family  
G12A4 | G12A RAS oncogene family  
G12A5 | G12A RAS oncogene family  
TAF9L | vesicle associated membrane protein 3  
ATP6V0C1 | ATPase H+ transporting V0 subunit c1  
DYNLC1 | dynactin cytoplasmic 1 light intermediate chain 2  
SEPA2 | RAB2A cytoskeleton organizing family  
G12A7 | G12A RAS oncogene family  
G12A8 | G12A RAS oncogene family  
WDR57 | WD repeat domain containing 7A  
ATP6V0E1 | ATPase H+ transporting V1 subunit E1  
LYAR2 | tyrosine receptor class B member 1  
MUC31 | mucin type 3 scavenger receptor chain 1  
HLA-DQ1 | major histocompatibility complex, class I, G  
DYNLC2 | dynactin cytoplasmic 2 light intermediate chain 2  
RAB2B | RAB2B small GTPase  
ATP6V0B1 | ATPase H+ transporting V0 subunit b1  
ITPS3 | toll like receptor 3  
GABK | gamma-aminobutyric acid receptor 1  
ATP6V0E2 | ATPase H+ transporting V1 subunit E2  
ATP6V0D1 | ATPase H+ transporting V0 subunit d1  
RAB23 | RAB23 small GTPase  
DYNLC3 | dynactin cytoplasmic 3 light intermediate chain 3  
GAB2 | toll like receptor 6  
ATP6V0F1 | ATPase H+ transporting accessory protein 1  
ATP6V0C2 | ATPase H+ transporting V0 subunit c2  
SEPC1A1 | SEC11 transmembrane alpha 1 subunit  
SEPC2 | SEC22 homolog B, vesicle trafficking protein (gene/pseudogene)  
ATP6V1H1 | ATPase H+ transporting V1 subunit H  
ATP6V1G1 | ATPase H+ transporting V1 subunit G  
HRS | ubiquitin ligase factor-regulated tyrosine kinase substrate  
DYNLC1L1 | dynactin cytoplasmic 1 light intermediate chain 1  
G12A6 | G12A RAS oncogene family  
G12A9 | G12A RAS oncogene family  
G12A10 | G12A RAS oncogene family  
ATP6V0E1 | ATPase H+ transporting V1 subunit E1  
SEPC1A2 | SEC11 transmembrane alpha 2 subunit  
ATP6V1C2 | ATPase H+ transporting V1 subunit C2  
ATP6V0E2 | ATPase H+ transporting V0 subunit e2

Transport and catabolism
