# Supplementary material for: Sepsis-associated pathways segregate cancer groups
Source: BMC Cancer. 2020 Apr 15;20:309. doi: 10.1186/s12885-020-06774-9 (PMC7160985; doi:10.1186/s12885-020-06774-9)
Supplement: Supplementary file 6 — Additional file 6: Table S3. Three SLC cancers were selected for survival analysis. The value in each cell corresponds to the p-value for association of the pathway with the cancer type. At a threshold of p < 0.1, the cell has been high-lighted, noting significant association of the pathway with survival from cancer. For each cancer, the proportion of pathways associated with survival was calculated and converted to percentage (bottom row of the table). [file 12885_2020_6774_MOESM6_ESM.xlsx]

## Sheet: comparison_with_ss
Supplementary Table S3: Three SLC cancers were selected for survival analysis. The value in each cell corresponds to the p-value for association of the pathway with the cancer type. At a threshold of p < 0.1, the cell has been high-lighted, noting significant association of the pathway with survival from cancer. Direction of pathway expression score was estimated from visual inspection of surviva…
	P-value				Direction in Survivors
Association with survival	SLC group				SLC group			Septic Shock
	HNSC	KIRC	LIHC		HNSC	KIRC	LIHC
Glycolysis / Gluconeogenesis | hsa00010	0.0727897	0.841861	0.243717		Low	-	Low	High
Pentose phosphate pathway | hsa00030	0.810714	0.740626	0.26361		-	-	Low	High
Galactose metabolism | hsa00052	0.985441	0.608648	0.993985		-	High	-	High
Glycerophospholipid metabolism | hsa00564	0.63243	0.652095	0.880825		-	-	-	High
Ribosome biogenesis in eukaryotes | hsa03008	0.261733	0.399092	0.62252		High	-	-	High
MAPK signaling pathway | hsa04010	0.530272	0.116194	0.0448393		-	High	High	High
ErbB signaling pathway | hsa04012	0.0778418	0.0818684	0.223748		High	High	-	High
Rap1 signaling pathway | hsa04015	0.51195	0.0275798	0.011291		-	High	High	High
HIF-1 signaling pathway | hsa04066	0.22139	0.035918	0.156877		Low	High	-	High
FoxO signaling pathway | hsa04068	0.272109	0.00308716	0.744637		Low	High	-	High
p53 signaling pathway | hsa04115	0.498044	0.238324	0.436657		-	High	-	Low
Lysosome | hsa04142	0.546265	0.307152	0.131216		-	High	High	High
Phagosome | hsa04145	0.979182	0.917451	0.145214		-	-	High	High
PI3K-Akt signaling pathway | hsa04151	0.881528	0.145876	0.000979116		-	High	High	High
AMPK signaling pathway | hsa04152	0.807001	0.00106656	0.948014		-	High	-	High
Dorso-ventral axis formation | hsa04320	0.00586613	0.0132962	0.0435899		High	High	High	High
VEGF signaling pathway | hsa04370	0.267896	0.0402166	0.0194145		-	High	High	High
Osteoclast differentiation | hsa04380	0.87846	0.207251	0.0794087		-	High	High	High
Focal adhesion | hsa04510	0.772882	0.117343	0.00133591		-	High	High	High
Adherens junction | hsa04520	0.196513	0.0102091	0.0133375		High	High	High	High
Platelet activation | hsa04611	0.957446	0.102553	0.00254249		-	High	High	High
Antigen processing and presentation | hsa04612	0.742439	0.140662	0.0190601		-	High	High	High
Toll-like receptor signaling pathway | hsa04620	0.851125	0.166655	0.548011		-	High	High	High
RIG-I-like receptor signaling pathway | hsa04622	0.915052	0.107912	0.437345		-	High	-	High
Jak-STAT signaling pathway | hsa04630	0.960591	0.0818449	0.617659		-	High	-	High
Fc epsilon RI signaling pathway | hsa04664	0.0607612	0.0366853	0.0555973		High	High	High	High
Fc gamma R-mediated phagocytosis | hsa04666	0.0953728	0.0123637	0.00702248		High	High	High	High
TNF signaling pathway | hsa04668	0.495724	0.0615324	0.475378		High	High	High	High
Leukocyte transendothelial migration | hsa04670	0.430575	0.00499741	0.0487312		-	High	High	High
Synaptic vesicle cycle | hsa04721	0.779626	0.96755	0.113423		-	-	High	High
Regulation of actin cytoskeleton | hsa04810	0.763424	0.0101305	0.010675		-	High	High	High
Insulin signaling pathway | hsa04910	0.720684	0.0110404	0.473853		-	High	High	High
GnRH signaling pathway | hsa04912	0.0752146	0.206275	0.150758		High	High	High	High
Ovarian steroidogenesis | hsa04913	0.994767	0.0181031	0.799316		-	High	-	High
Progesterone-mediated oocyte maturation | hsa04914	0.799336	0.0312152	0.181388		-	High	-	High
Prolactin signaling pathway | hsa04917	0.120924	0.0228423	0.534797		High	High	-	High
Vitamin digestion and absorption | hsa04977	0.837201	0.350955	0.972744		-	Low	-	High
Amyotrophic lateral sclerosis (ALS) | hsa05014	0.137984	0.106094	0.256495		-	High	High	High
Morphine addiction | hsa05032	0.200342	0.282824	0.021959		-	High	High	High
Alcoholism | hsa05034	0.283014	0.030986	0.106923		High	High	High	High
Bacterial invasion of epithelial cells | hsa05100	0.487214	0.102929	0.0385112		-	High	High	High
Vibrio cholerae infection | hsa05110	0.205073	0.667459	0.243757		High	-	High	High
Epithelial cell signaling in Helicobacter pylori infection | hsa05120	0.115861	0.20692	0.569452		High	High	High	High
Salmonella infection | hsa05132	0.0733221	0.545726	0.378411		High	-	High	High
Pertussis | hsa05133	0.977081	0.49679	0.392564		-	-	High	High
Legionellosis | hsa05134	0.305542	0.978791	0.630614		High	-	High	High
Chagas disease (American trypanosomiasis) | hsa05142	0.706572	0.0958155	0.116929		-	High	High	High
Amoebiasis | hsa05146	0.673732	0.923941	0.0291908		-	-	High	High
Tuberculosis | hsa05152	0.993694	0.957408	0.00916157		-	-	High	High
Hepatitis C | hsa05160	0.315219	0.0346588	0.322656		High	High	High	High
Hepatitis B | hsa05161	0.194184	0.0501635	0.139491		High	High	High	High
Pathways in cancer | hsa05200	0.665464	0.0135581	0.00559619		-	High	High	High
Transcriptional misregulation in cancer | hsa05202	0.797045	0.439502	0.0606719		-	-	High	High
Chemical carcinogenesis | hsa05204	0.79557	0.0536799	0.0220364		-	Low	Low	High
Proteoglycans in cancer | hsa05205	0.842439	0.0582754	0.0448393		-	High	High	High
Renal cell carcinoma | hsa05211	0.598757	0.0365487	0.0826951		-	High	High	High
Pancreatic cancer | hsa05212	0.450333	0.00943192	0.279122		High	High	High	High
Glioma | hsa05214	0.608717	0.159007	0.0713886		-	High	High	High
Prostate cancer | hsa05215	0.386373	0.0129075	0.0211414		-	High	High	High
Melanoma | hsa05218	0.59337	0.0962321	0.00899609		-	High	High	High
Bladder cancer | hsa05219	0.00403461	0.00475717	0.0286572		High	High	High	High
Acute myeloid leukemia | hsa05221	0.472847	0.00436954	0.762278		-	High	-	High
Non-small cell lung cancer | hsa05223	0.570162	0.0236803	0.56901		High	High	-	High
Central carbon metabolism in cancer | hsa05230	0.690455	0.0202685	0.103158		-	High	High	High
Choline metabolism in cancer | hsa05231	0.0357772	0.010103	0.0289819		High	High	High	High
Primary immunodeficiency | hsa05340	0.765471	0.223679	0.308439		-	High	High	High
Fraction of pathways associated with survial	0.136364	0.515152	0.424242
