# Supplementary material for: Sepsis-associated pathways segregate cancer groups
Source: BMC Cancer. 2020 Apr 15;20:309. doi: 10.1186/s12885-020-06774-9 (PMC7160985; doi:10.1186/s12885-020-06774-9)
Supplement: Supplementary file 7 — Additional file 7: Table S4. List of additional cancer data sets for machine learning-based prediction of cancer samples. [file 12885_2020_6774_MOESM7_ESM.xls]

## Sheet: Sheet1
Supplementary Table S4: List of additional cancer data sets for machine learning-based prediction of cancer samples.
GEO_ID	Cancer	Type of tumour	Number of samples	Number of tumour samples used in analysis	Number of control samples used in analysis	Platform	Normalization
GSE103512	Breast, Colorectal, Prostate, And Non-Small Cell Lung Cancer	Solid Tumor	280	242	38	GPL13158[HT_HG-U133_Plus_PM] Affymetrix HT HG-U133+ PM Array Plate	Quantile
GSE112790	Hepatocellular Carcinoma	Solid Tumor	198	183	15	GPL570 [HG-U133_Plus_2] Affymetrix Human Genome U133 Plus 2.0 Array	Quantile
GSE32665	Lung adenocarcinoma	Solid Tumor	170	85	85	GPL6102Illumina human-6 v2.0 expression beadchip	Quantile
GSE33479	Lung squamous carcinogenesis	Solid Tumor	122	14	27	GPL6480 Agilent-014850 Whole Human Genome Microarray 4x44K G4112F (Probe Name version)	Natural log of (Cy5/Cy3)
GSE84984	Colorectal Cancer	Solid Tumor	15	9	6	GPL17586 [HTA-2_0] Affymetrix Human Transcriptome Array 2.0 [transcript (gene) version]	RMA
GSE103236	Gastric Cancer	Solid Tumor	19	9	9	GPL4133Agilent-014850 Whole Human Genome Microarray 4x44K G4112F (Feature Number version)	Lowess
