# Supplementary material for: Sepsis-associated pathways segregate cancer groups
Source: BMC Cancer. 2020 Apr 15;20:309. doi: 10.1186/s12885-020-06774-9 (PMC7160985; doi:10.1186/s12885-020-06774-9)
Supplement: Supplementary file 8 — Additional file 8: Table S5. Viral integration in TCGA samples. [file 12885_2020_6774_MOESM8_ESM.xls]

## Sheet: Sheet1
Sr. No.	Title	Author_year	PMID	Source of Samples: TCGA	Data Availability for re-analysis	Evidence	source	overlap	Percentage of Viral presence in TCGA samples	Note
1	The landscape of viral expression and host gene fusion and adaptation in human cancer	Tang 2013	24085110	yes	Yes	4,433 tumours and 19 cancer types, for known and novel expressed viruses based on 4700 billion transcriptome sequencing reads from The Cancer Genome Atlas Research Network.	TCGA	sample Ids don’t match	CESC and LIHC showed the highest proportion of virus-positive tumours (96.6% and 32.4%, respectively, 42 p.p.m.), followed by head and neck squamous cell carcinoma (HNSC, 14.8%)	Viruses can cause cellular transformation by expression of viral oncogenes, by genomic integration to alter the activity of cellular proto-oncogenes or tumour suppressors, and by inducing inflammation that promotes oncogenesis.
2	Possible Human Papillomavirus 38 Contamination of Endometrial Cancer RNA Sequencing Samples in The Cancer Genome Atlas Database	Kazemian2015	26085148	yes	No (Summary data from paper are re-analyzed)	We found HPV38 sequences specifically present in RNA-Seq samples from endometrial cancer patients from TCGA, a virus not previously associated with this type of cancer.	TCGA	very few ids match	the most com monly observed viral sequences in our 2,102 compiled RNA-Seq data sets comprising 21 cancers belonged to HPV, hepatitis virus, and herpesviruses, which collectively were present in ~9.5% of cancer patients	However, multiple lines of evidence suggest possible cross-contamination in these samples, which were processed together in the same batch. Despite this potential cross-contamination, our data indicate that we have detected a new isolate of HPV38 that appears to be integrated into the human genome. We also provide general guidelines for computational detection and interpretation of pathogen-disea…
3	Divergent viral presentation among human tumors and adjacent normal tissues	Cao 2016	27339696	yes		viral basis of 6,813 human tumors and 559 adjacent normal samples across 23 cancer types and identified 505 virus positive samples with distinctive, organ system- and cancer type-specific distributions	TCGA	NA	liver hepatocellular carcinoma (LIHC), cervical carcinoma and endocer- vical adenocarcinoma (CESC), and head/neck squamous cell carcinoma (HNSC) all show frequent viral presence (>5%)
4	Viral Sequences in Human Cancer	Cantalupo 2019	31465960	yes	No	We analyzed a collection of whole genome (WGS), exome (WXS), and RNA (RNA-Seq) sequencing libraries from 3,052 participants across 22 different cancers.	TCGA	NA	Viruses were detected in 7.5 - 98.8% of patients of seven cancers (BLCA, CESC, COAD, HNSC, LIHC, READ, and STAD)
5	Viral expression associated with gastrointestinal adenocarcinomas in TCGA high-throughput sequencing data	Salyakina 2013	24279398	yes	No	The Cancer Genome Atlas (TCGA). Nine hundred fifty eight primary tumors in nine common cancers with poor prognosis were screened against a non-redundant database of virus sequences	TCGA	NA	0.4 to 3.8 % of the human genome of some cancers are infected with viruses (Table 2 ).	Our comprehensive screening for viruses in multiple cancer types using next-generation sequencing data clearly demonstrates the presence of viral sequences in GIA. EBV, CMV, and HPV-18 are potentially causal for GIA, although their oncogenic role is yet to be established.
6
7

## Sheet: Supp.Table.4
	Supplemental Table S5: Viral integration in TCGA samples. Results are derived from published data.
		Tang2013 [a]		Cao2016 [b]		Kazemina2015 [c] **
		N (%)	P-value	N (%)	P-value	N (%)	P-value
	Samples analysed in current manuscript	687	0.0003	687	0.001	N.A.	4.1e-13
	Overlap with published study	425 (61.9%)		533 (77.6%)		N.A.
	SLC samples	120 (28.2%)		200 (37.5%)		305
	CA samples	305 (71.8%)		333 (62.5%)		1175
	Viral integration in SLC	9 (7.5%)		60 (30%)		57 (18.7%)
	Viral integration in CA	2 (0.66 %)		58 (17.4 %)		66 (5.6%)
						** Sample-level data are not available. Number and proportion of viral integration in SLC and CA samples are calculated from summary data provided in the publication (Table 1 of [c]).
[a]	Tang KW, Alaei-Mahabadi B, Samuelsson T, Lindh M, Larsson E. The landscape of viral expression and host gene fusion and adaptation in human cancer. Nature Communications. 2013;4:1–9.
[b]	Cao S, Wendl MC, Wyczalkowski MA, Wylie K, Ye K, Jayasinghe R, et al. Divergent viral presentation among human tumors and adjacent normal tissues. Scientific Reports. 2016;6 June:1–12.
[c]	Kazemian M, Ren M, Lin J-X, Liao W, Spolski R, Leonard WJ. Possible Human Papillomavirus 38 Contamination of Endometrial Cancer RNA Sequencing Samples in The Cancer Genome Atlas Database. Journal of Virology. 2015;89:8967–73.
